## SUPPLEMENTARY DATA

Fig. S1. (A) A binary scan of the area of a lobed *M. laciniatus* × *M. guttatus*  $F_2$  leaf. (B) The convex hull area of the  $F_2$  leaf from (A) is indicated by the red line. (C) The convex hull measurement of a round *M. guttatus*. Note the greater difference between the true area of a lobed leaf and its convex hull than that between the area of a round leaf and its convex hull.

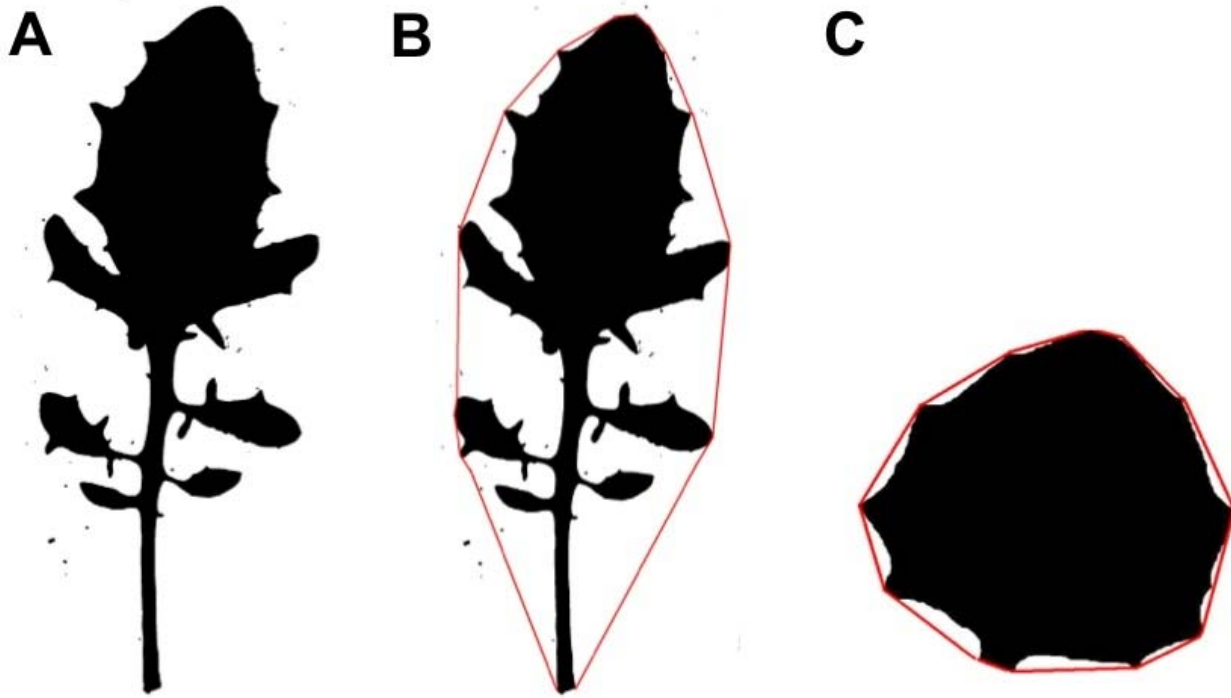

Table S1. The length of and number of genes in each significant *M. laciniatus* × *M. guttatus* QTL region.

| QTL Region | Length (kb) | No. of genes |
|------------|-------------|--------------|
| LG2.1      | 1075        | 105          |
| LG2.2      | 1029        | 210          |
| LG4.1      | 5108        | 906          |
| LG4.2      | 578         | 40           |
| LG11       | 2589        | 494          |

Table S2. A complete list of annotated *Mimulus* genes located under each of the three significant bulk segregant QTL regions including *Mimulus* ID number, *A. thaliana* ortholog, and predicted gene function. Genes related to leaf development are highlighted in green.

| <i>M. guttatus</i> ID | Linkage Group | Position | <i>A. thaliana</i> ID | <i>A. thaliana</i> name                                           | <i>A. thaliana</i> function                           |
|-----------------------|---------------|----------|-----------------------|-------------------------------------------------------------------|-------------------------------------------------------|
| <i>Migut.B01176</i>   | LG2           | 13894257 | <i>AT3G15605.4</i>    | Symbols:                                                          | nucleic acid binding                                  |
| <i>Migut.B01177</i>   | LG2           | 13916320 | <i>AT2G38720.1</i>    | Symbols: MAP65-5                                                  | microtubule-associated protein 65-5                   |
| <i>Migut.B01178</i>   | LG2           | 13922912 | <i>AT5G07050.1</i>    | Symbols:                                                          | nodulin MtN21 /EamA-like transporter family protein   |
| <i>Migut.B01179</i>   | LG2           | 13986823 | <i>AT5G06570.2</i>    | Symbols:                                                          | alpha/beta-Hydrolases superfamily protein             |
| <i>Migut.B01180</i>   | LG2           | 13992262 | <i>AT5G45140.1</i>    | Symbols: NRPC2                                                    | nuclear RNA polymerase C2                             |
| <i>Migut.B01181</i>   | LG2           | 14005108 | <i>AT5G45140.1</i>    | Symbols: NRPC2                                                    | nuclear RNA polymerase C2                             |
| <i>Migut.B01182</i>   | LG2           | 14020899 | <i>AT5G07020.1</i>    | Symbols:                                                          | proline-rich family protein                           |
| <i>Migut.B01183</i>   | LG2           | 14027355 | <i>AT2G40840.1</i>    | Symbols: DPE2                                                     | disproportionating enzyme 2                           |
| <i>Migut.B01184</i>   | LG2           | 14029542 | <i>AT5G03450.1</i>    | Symbols:                                                          | Transducin/WD40 repeat-like superfamily protein       |
| <i>Migut.B01185</i>   | LG2           | 14031502 | <i>AT5G38430.1</i>    | Symbols:                                                          | Ribulose biphosphate carboxylase (small chain)        |
| <i>Migut.B01186</i>   | LG2           | 14035161 | <i>AT5G07010.1</i>    | Symbols: ATST2A, ST2A<br>Symbols: AGL20, SOC1,<br>ATSOC1          | sulfotransferase 2A<br>AGAMOUS-like 20                |
| <i>Migut.B01187</i>   | LG2           | 14045250 | <i>AT2G45660.1</i>    | Symbols: AMS                                                      | basic helix-loop-helix (bHLH) DNA-binding superfamily |
| <i>Migut.B01188</i>   | LG2           | 14048511 | <i>AT2G16910.1</i>    | Symbols:                                                          | unknown protein; BEST Arabidopsis thaliana protein    |
| <i>Migut.B01189</i>   | LG2           | 14067763 | <i>AT3G12320.1</i>    | Symbols:                                                          | D-aminoacid aminotransferase-like PLP-dependent       |
| <i>Migut.B01190</i>   | LG2           | 14085170 | <i>AT5G27410.1</i>    | Symbols:                                                          | 5'-3' exonuclease family protein                      |
| <i>Migut.B01191</i>   | LG2           | 14102766 | <i>AT1G01880.2</i>    | Symbols:                                                          | unknown protein; FUNCTIONS IN: molecular_function     |
| <i>Migut.B01192</i>   | LG2           | 14116245 | <i>AT3G12300.1</i>    | Symbols:                                                          | unknown protein; FUNCTIONS IN: molecular_function     |
| <i>Migut.B01193</i>   | LG2           | 14118885 | <i>AT5G09860.1</i>    | Symbols: AtTHO1, THO1,<br>AtHPR1, HPR1                            | nuclear matrix protein-related                        |
| <i>Migut.B01194</i>   | LG2           | 14142764 | <i>AT5G13460.1</i>    | Symbols: IQD11                                                    | IQ-domain 11                                          |
| <i>Migut.B01195</i>   | LG2           | 14145992 | <i>AT1G74470.1</i>    | Symbols:                                                          | Pyridine nucleotide-disulphide oxidoreductase family  |
| <i>Migut.B01196</i>   | LG2           | 14149069 | <i>AT5G03990.1</i>    | Symbols:                                                          | unknown protein; BEST Arabidopsis thaliana protein    |
| <i>Migut.B01197</i>   | LG2           | 14152427 | <i>AT3G08550.1</i>    | Symbols: ELD1, ABI8,<br>KOB1                                      | elongation defective 1 protein                        |
| <i>Migut.B01198</i>   | LG2           | 14186797 | <i>AT3G51930.1</i>    | Symbols:                                                          | Transducin/WD40 repeat-like superfamily protein       |
| <i>Migut.B01199</i>   | LG2           | 14239965 | <i>AT5G63940.1</i>    | Symbols:                                                          | Protein kinase protein with adenine nucleotide        |
| <i>Migut.B01200</i>   | LG2           | 14249557 | <i>AT5G09270.2</i>    | Symbols:                                                          | unknown protein; Has 25 Blast hits to 25 proteins     |
| <i>Migut.B01201</i>   | LG2           | 14251547 | <i>AT5G63950.1</i>    | Symbols: CHR24                                                    | chromatin remodeling 24                               |
| <i>Migut.B01202</i>   | LG2           | 14264870 | <i>AT1G64890.1</i>    | Symbols:                                                          | Major facilitator superfamily protein                 |
| <i>Migut.B01203</i>   | LG2           | 14267629 | <i>AT4G33830.1</i>    | Symbols:                                                          | Glycosyl hydrolase family 10 protein                  |
| <i>Migut.B01204</i>   | LG2           | 14274207 | <i>AT2G21100.1</i>    | Symbols:                                                          | Disease resistance-responsive (dirigent-like protein) |
| <i>Migut.B01205</i>   | LG2           | 14277087 | <i>AT3G15750.1</i>    | Symbols:                                                          | Essential protein Yae1, N-terminal                    |
| <i>Migut.B01206</i>   | LG2           | 14279672 | <i>AT2G38780.1</i>    | Symbols:                                                          | unknown protein; FUNCTIONS IN: molecular_function     |
| <i>Migut.B01207</i>   | LG2           | 14285463 | <i>AT4G36950.1</i>    | Symbols: MAPKKK21                                                 | mitogen-activated protein kinase kinase               |
| <i>Migut.B01208</i>   | LG2           | 14287773 | <i>AT4G30880.1</i>    | Symbols:                                                          | Bifunctional inhibitor/lipid-transfer protein/seed    |
| <i>Migut.B01209</i>   | LG2           | 14294697 | <i>AT1G52340.1</i>    | Symbols: ABA2, SIS4,<br>GIN1, SDR1, ISI4, SRE1,<br>ATABA2, ATSDR1 |                                                       |
| <i>Migut.B01210</i>   | LG2           | 14300635 | <i>AT5G23395.1</i>    | Symbols: MIA40                                                    | Cox19-like CHCH family protein                        |
| <i>Migut.B01211</i>   | LG2           | 14303383 | <i>AT3G54510.2</i>    | Symbols:                                                          | Early-responsive to dehydration stress protein        |
| <i>Migut.B01212</i>   | LG2           | 14308636 | <i>AT2G38760.1</i>    | Symbols: ANNAT3, ANN3                                             | annexin 3                                             |

|                     |     |          |                    |                                              |                                                             |
|---------------------|-----|----------|--------------------|----------------------------------------------|-------------------------------------------------------------|
| <i>Migut.B01213</i> | LG2 | 14316081 | <i>AT2G38750.1</i> | Symbols: ANNAT4                              | annexin 4                                                   |
| <i>Migut.B01214</i> | LG2 | 14325555 | <i>AT5G12380.1</i> | Symbols: ANNAT8                              | annexin 8                                                   |
| <i>Migut.B01215</i> | LG2 | 14334407 | <i>AT3G54500.1</i> | Symbols:                                     | BEST Arabidopsis thaliana protein match is: dentin          |
| <i>Migut.B01216</i> | LG2 | 14348232 | <i>AT3G63480.2</i> | Symbols:                                     | ATP binding microtubule motor family protein                |
| <i>Migut.B01217</i> | LG2 | 14353460 | <i>AT3G54490.1</i> | Symbols: RPB5E                               | RNA polymerase II fifth largest subunit, E                  |
| <i>Migut.B01218</i> | LG2 | 14360216 | <i>AT3G07300.2</i> | Symbols:                                     | NagB/RpiA/CoA transferase-like superfamily protein          |
| <i>Migut.B01219</i> | LG2 | 14377224 | <i>AT3G61790.1</i> | Symbols:                                     | Protein with RING/U-box and TRAF-like domains               |
| <i>Migut.B01220</i> | LG2 | 14384839 | <i>AT3G54470.1</i> | Symbols:                                     | uridine 5'-monophosphate synthase / UMP synthase            |
| <i>Migut.B01221</i> | LG2 | 14404017 | <i>AT3G07940.1</i> | Symbols:                                     | Calcium-dependent ARF-type GTPase activating protein        |
| <i>Migut.B01222</i> | LG2 | 14410357 | <i>AT5G13810.1</i> | Symbols:                                     | Glutaredoxin family protein                                 |
| <i>Migut.B01223</i> | LG2 | 14423757 | <i>AT5G13480.1</i> | Symbols: FY                                  | Transducin/WD40 repeat-like superfamily protein             |
| <i>Migut.B01224</i> | LG2 | 14434492 | <i>AT3G57040.1</i> | Symbols: ARR9, ATRR4                         | response regulator 9                                        |
| <i>Migut.B01225</i> | LG2 | 14437470 | <i>AT3G54460.1</i> | Symbols:                                     | SNF2 domain-containing protein / helicase domain-containing |
| <i>Migut.B01226</i> | LG2 | 14447992 | <i>AT3G54450.1</i> | Symbols:                                     | Major facilitator superfamily protein                       |
| <i>Migut.B01227</i> | LG2 | 14473813 | <i>AT2G40030.1</i> | Symbols: NRPD1B, DRD3, ATNRPD1B, DMS5, NRPE1 | nuclear RNA                                                 |
| <i>Migut.B01228</i> | LG2 | 14489579 | <i>AT3G54440.1</i> | Symbols:                                     | glycoside hydrolase family 2 protein                        |
| <i>Migut.B01229</i> | LG2 | 14498300 | <i>AT5G63320.1</i> | Symbols: NPX1                                | nuclear protein X1                                          |
| <i>Migut.B01230</i> | LG2 | 14505367 | <i>AT5G63320.1</i> | Symbols: NPX1                                | nuclear protein X1                                          |
| <i>Migut.B01231</i> | LG2 | 14512400 | <i>AT5G63320.1</i> | Symbols: NPX1                                | nuclear protein X1                                          |
| <i>Migut.B01232</i> | LG2 | 14521154 | <i>AT4G15236.1</i> | Symbols:                                     | ABC-2 and Plant PDR ABC-type transporter family             |
| <i>Migut.B01233</i> | LG2 | 14524472 | <i>AT1G49250.1</i> | Symbols:                                     | ATP-dependent DNA ligase                                    |
| <i>Migut.B01234</i> | LG2 | 14527309 | <i>AT3G07960.1</i> | Symbols:                                     | Phosphatidylinositol-4-phosphate 5-kinase family            |
| <i>Migut.B01235</i> | LG2 | 14561115 | <i>AT3G54400.1</i> | Symbols:                                     | Eukaryotic aspartyl protease family protein                 |
| <i>Migut.B01236</i> | LG2 | 14568219 | <i>AT3G54390.1</i> | Symbols:                                     | sequence-specific DNA binding transcription factors         |
| <i>Migut.B01237</i> | LG2 | 14572583 | <i>AT1G08315.1</i> | Symbols:                                     | ARM repeat superfamily protein                              |
| <i>Migut.B01238</i> | LG2 | 14574142 | <i>AT4G38490.1</i> | Symbols:                                     | unknown protein; Has 30201 Blast hits to 17322              |
| <i>Migut.B01239</i> | LG2 | 14577820 | <i>AT3G06730.1</i> | Symbols: TRX P, TRX z                        | Thioredoxin z                                               |
| <i>Migut.B01240</i> | LG2 | 14580495 | <i>AT3G56710.1</i> | Symbols: SIB1                                | sigma factor binding protein 1                              |
| <i>Migut.B01241</i> | LG2 | 14591061 | <i>AT2G38730.1</i> | Symbols:                                     | Cyclophilin-like peptidyl-prolyl cis-trans isomerase        |
| <i>Migut.B01242</i> | LG2 | 14594811 | <i>AT5G06970.1</i> | Symbols:                                     | Protein of unknown function (DUF810)                        |
| <i>Migut.B01243</i> | LG2 | 14619050 |                    |                                              |                                                             |
| <i>Migut.B01244</i> | LG2 | 14634332 | <i>AT1G20160.2</i> | Symbols: ATSBT5.2                            | Subtilisin-like serine endopeptidase family                 |
| <i>Migut.B01245</i> | LG2 | 14643465 | <i>AT5G65750.1</i> | Symbols:                                     | 2-oxoglutarate dehydrogenase, E1 component                  |
| <i>Migut.B01246</i> | LG2 | 14649268 | <i>AT1G05490.1</i> | Symbols: chr31                               | chromatin remodeling 31                                     |
| <i>Migut.B01247</i> | LG2 | 14658470 | <i>AT1G05490.1</i> | Symbols: chr31                               | chromatin remodeling 31                                     |
| <i>Migut.B01248</i> | LG2 | 14667609 | <i>AT1G78830.1</i> | Symbols:                                     | Curculin-like (mannose-binding) lectin family protein       |
| <i>Migut.B01249</i> | LG2 | 14675292 | <i>AT3G15140.1</i> | Symbols:                                     | Polynucleotidyl transferase, ribonuclease H-like            |
| <i>Migut.B01250</i> | LG2 | 14704530 | <i>AT2G41510.1</i> | Symbols: ATCKX1, CKX1                        | cytokinin oxidase/dehydrogenase 1                           |
| <i>Migut.B01251</i> | LG2 | 14714275 | <i>AT1G12830.1</i> | Symbols:                                     | unknown protein; FUNCTIONS IN: molecular_function           |
| <i>Migut.B01252</i> | LG2 | 14718064 | <i>AT5G18475.1</i> | Symbols:                                     | Pentatricopeptide repeat (PPR) superfamily protein          |
| <i>Migut.B01253</i> | LG2 | 14728888 | <i>AT2G41540.3</i> | Symbols: GPDHC1                              | 6-phosphogluconate dehydrogenase family protein             |
| <i>Migut.B01254</i> | LG2 | 14735706 | <i>AT5G13470.1</i> | Symbols:                                     | unknown protein; Has 1807 Blast hits to 1807 proteins       |
| <i>Migut.B01255</i> | LG2 | 14737241 | <i>AT5G13800.1</i> | Symbols: PPH, CRN1                           | pheophytinase                                               |
| <i>Migut.B01256</i> | LG2 | 14745394 | <i>AT3G63460.1</i> | Symbols:                                     | transducin family protein / WD-40 repeat family             |

|                     |     |          |                    |                           |                                                                  |
|---------------------|-----|----------|--------------------|---------------------------|------------------------------------------------------------------|
| <i>Migut.B01257</i> | LG2 | 14758458 | <i>AT3G51990.1</i> | Symbols:                  | Protein kinase superfamily protein                               |
| <i>Migut.B01258</i> | LG2 | 14768796 | <i>AT1G01550.2</i> | Symbols: BPS1             | Protein of unknown function (DUF793)                             |
| <i>Migut.B01259</i> | LG2 | 14772575 | <i>AT1G01550.2</i> | Symbols: BPS1             | Protein of unknown function (DUF793)                             |
| <i>Migut.B01260</i> | LG2 | 14803023 | <i>AT5G13780.1</i> | Symbols:                  | Acyl-CoA N-acyltransferases (NAT) superfamily protein            |
| <i>Migut.B01261</i> | LG2 | 14805649 | <i>AT5G45500.2</i> | Symbols:                  | RNI-like superfamily protein                                     |
| <i>Migut.B01262</i> | LG2 | 14806564 | <i>AT5G45480.1</i> | Symbols:                  | Protein of unknown function (DUF594)                             |
| <i>Migut.B01263</i> | LG2 | 14827302 | <i>AT3G50950.1</i> | Symbols: ZAR1             | HOPZ-ACTIVATED RESISTANCE 1                                      |
| <i>Migut.B01264</i> | LG2 | 14828395 | <i>AT2G02250.1</i> | Symbols: AtPP2-B2, PP2-B2 | phloem protein 2-B2                                              |
| <i>Migut.B01265</i> | LG2 | 14837163 | <i>AT5G13760.1</i> | Symbols:                  | Plasma-membrane choline transporter family protein               |
| <i>Migut.B01266</i> | LG2 | 14850594 | <i>AT3G24090.1</i> | Symbols:                  | glutamine-fructose-6-phosphate transaminase (isomerizing)s;sugar |
| <i>Migut.B01267</i> | LG2 | 14856983 | <i>AT3G43800.1</i> | Symbols: ATGSTU27, GSTU27 | glutathione S-transferase tau 27                                 |
| <i>Migut.B01268</i> | LG2 | 14865815 | <i>AT3G48530.1</i> | Symbols: KING1            | SNF1-related protein kinase regulatory subunit                   |
| <i>Migut.B01269</i> | LG2 | 14891781 | <i>AT3G63490.1</i> | Symbols:                  | Ribosomal protein L1p/L10e family                                |
| <i>Migut.B01270</i> | LG2 | 14894703 | <i>AT5G15920.1</i> | Symbols: SMC5             | structural maintenance of chromosomes 5                          |
| <i>Migut.B01271</i> | LG2 | 14910482 | <i>AT5G13730.1</i> | Symbols: SIG4, SIGD       | sigma factor 4                                                   |
| <i>Migut.B01272</i> | LG2 | 14914733 | <i>AT5G13720.1</i> | Symbols:                  | Uncharacterised protein family (UPF0114)                         |
| <i>Migut.B01273</i> | LG2 | 14922578 | <i>AT1G51410.1</i> | Symbols:                  | NAD(P)-binding Rossmann-fold superfamily protein                 |
| <i>Migut.B01274</i> | LG2 | 14933239 | <i>AT5G19440.1</i> | Symbols:                  | NAD(P)-binding Rossmann-fold superfamily protein                 |
| <i>Migut.B01275</i> | LG2 | 14941352 | <i>AT1G51410.1</i> | Symbols:                  | NAD(P)-binding Rossmann-fold superfamily protein                 |
| <i>Migut.B01276</i> | LG2 | 14947991 | <i>AT5G13690.1</i> | Symbols: CYL1, NAGLU      | alpha-N-acetylglucosaminidase family                             |
| <i>Migut.B01277</i> | LG2 | 14956262 | <i>AT3G15660.2</i> | Symbols: ATGRX4, GRX4     | glutaredoxin 4                                                   |
| <i>Migut.B01278</i> | LG2 | 14964291 | <i>AT3G57450.1</i> | Symbols:                  | unknown protein; Has 65 Blast hits to 65 proteins                |
| <i>Migut.B01279</i> | LG2 | 14967913 | <i>AT5G42510.1</i> | Symbols:                  | Disease resistance-responsive (dirigent-like protein)            |
| <i>Migut.B01280</i> | LG2 | 14969446 | <i>AT5G13710.2</i> | Symbols: SMT1, CPH        | sterol methyltransferase 1                                       |
| <i>Migut.B01711</i> | LG2 | 18034024 | <i>AT3G61220.1</i> | Symbols:                  | NAD(P)-binding Rossmann-fold superfamily protein                 |
| <i>Migut.B01712</i> | LG2 | 18035950 | <i>AT3G61220.1</i> | Symbols:                  | NAD(P)-binding Rossmann-fold superfamily protein                 |
| <i>Migut.B01713</i> | LG2 | 18037955 | <i>AT3G61220.1</i> | Symbols:                  | NAD(P)-binding Rossmann-fold superfamily protein                 |
| <i>Migut.B01714</i> | LG2 | 18040016 | <i>AT3G61220.1</i> | Symbols:                  | NAD(P)-binding Rossmann-fold superfamily protein                 |
| <i>Migut.B01715</i> | LG2 | 18046258 | <i>AT3G61220.1</i> | Symbols:                  | NAD(P)-binding Rossmann-fold superfamily protein                 |
| <i>Migut.B01716</i> | LG2 | 18049373 | <i>AT4G00660.1</i> | Symbols: RH8, ATRH8       | RNAhelicase-like 8                                               |
| <i>Migut.B01717</i> | LG2 | 18055426 | <i>AT2G26680.1</i> | Symbols:                  | CONTAINS InterPro DOMAIN/s: Methyltransferase FkbM               |
| <i>Migut.B01718</i> | LG2 | 18060152 | <i>AT3G61250.1</i> | Symbols: AtMYB17, MYB17   | myb domain protein 17                                            |
| <i>Migut.B01719</i> | LG2 | 18062846 | <i>AT5G23750.2</i> | Symbols:                  | Remorin family protein                                           |
| <i>Migut.B01720</i> | LG2 | 18064664 | <i>AT1G01800.1</i> | Symbols:                  | NAD(P)-binding Rossmann-fold superfamily protein                 |
| <i>Migut.B01721</i> | LG2 | 18067736 | <i>AT3G61220.1</i> | Symbols:                  | NAD(P)-binding Rossmann-fold superfamily protein                 |
| <i>Migut.B01722</i> | LG2 | 18070670 | <i>AT4G00590.1</i> | Symbols:                  | N-terminal nucleophile aminohydrolases (Ntn hydrolases)          |
| <i>Migut.B01723</i> | LG2 | 18074357 | <i>AT4G00620.1</i> | Symbols:                  | Amino acid dehydrogenase family protein                          |
| <i>Migut.B01724</i> | LG2 | 18077319 | <i>AT4G00630.1</i> | Symbols: KEA2, ATKEA2     | K+ efflux antiporter 2                                           |
| <i>Migut.B01725</i> | LG2 | 18088356 | <i>AT2G45800.1</i> | Symbols:                  | GATA type zinc finger transcription factor family                |
| <i>Migut.B01726</i> | LG2 | 18092694 | <i>AT5G20165.1</i> | Symbols:                  | unknown protein; FUNCTIONS IN: molecular_function                |
| <i>Migut.B01727</i> | LG2 | 18093032 | <i>AT4G19990.2</i> | Symbols: FRS1             | FAR1-related sequence 1                                          |
| <i>Migut.B01728</i> | LG2 | 18108196 | <i>AT3G61270.1</i> | Symbols:                  | Arabidopsis thaliana protein of unknown function                 |
| <i>Migut.B01729</i> | LG2 | 18112853 | <i>AT5G23850.1</i> | Symbols:                  | Arabidopsis thaliana protein of unknown function                 |

|                     |     |          |                    |                                           |                                                          |
|---------------------|-----|----------|--------------------|-------------------------------------------|----------------------------------------------------------|
| <i>Migut.B01730</i> | LG2 | 18115520 | <i>AT1G01750.1</i> | Symbols: ADF11                            | actin depolymerizing factor 11                           |
| <i>Migut.B01731</i> | LG2 | 18118393 | <i>AT3G48480.1</i> | Symbols:                                  | Cysteine proteinases superfamily protein                 |
| <i>Migut.B01732</i> | LG2 | 18122894 | <i>AT4G11610.1</i> | Symbols:                                  | C2 calcium/lipid-binding plant phosphoribosyltransferase |
| <i>Migut.B01733</i> | LG2 | 18127350 | <i>AT5G31412.1</i> | Symbols:                                  | hAT transposon superfamily protein                       |
| <i>Migut.B01734</i> | LG2 | 18128900 | <i>AT2G38710.2</i> | Symbols:                                  | AMMECR1 family                                           |
| <i>Migut.B01735</i> | LG2 | 18141832 | <i>AT1G35660.1</i> | Symbols:                                  | unknown protein; FUNCTIONS IN: molecular_function        |
| <i>Migut.B01736</i> | LG2 | 18143209 | <i>AT1G26520.1</i> | Symbols:                                  | Cobalamin biosynthesis CobW-like protein                 |
| <i>Migut.B01737</i> | LG2 | 18144443 | <i>AT2G10440.2</i> | Symbols:                                  | unknown protein; FUNCTIONS IN: molecular_function        |
| <i>Migut.B01738</i> | LG2 | 18145552 | <i>AT2G29910.1</i> | Symbols:                                  | F-box/RNI-like superfamily protein                       |
| <i>Migut.B01739</i> | LG2 | 18146651 | <i>AT2G45850.2</i> | Symbols:                                  | AT hook motif DNA-binding family protein                 |
| <i>Migut.B01740</i> | LG2 | 18151012 | <i>AT2G45860.1</i> | Symbols:                                  | unknown protein; Has 32 Blast hits to 32 proteins        |
| <i>Migut.B01741</i> | LG2 | 18152747 | <i>AT4G15900.1</i> | Symbols: PRL1                             | pleiotropic regulatory locus 1                           |
| <i>Migut.B01742</i> | LG2 | 18159932 | <i>AT1G01730.1</i> | Symbols:                                  | unknown protein; FUNCTIONS IN: molecular_function        |
| <i>Migut.B01743</i> | LG2 | 18163529 | <i>AT4G20960.1</i> | Symbols:                                  | Cytidine/deoxycytidylate deaminase family protein        |
| <i>Migut.B01744</i> | LG2 | 18165925 | <i>AT3G58760.1</i> | Symbols:                                  | Integrin-linked protein kinase family                    |
| <i>Migut.B01745</i> | LG2 | 18170173 | <i>AT3G61350.1</i> | Symbols: SKIP4                            | SKP1 interacting partner 4                               |
| <i>Migut.B01746</i> | LG2 | 18173074 | <i>AT1G32360.1</i> | Symbols:                                  | Zinc finger (CCCH-type) family protein                   |
| <i>Migut.B01747</i> | LG2 | 18180014 | <i>AT3G49050.1</i> | Symbols:                                  | alpha/beta-Hydrolases superfamily protein                |
| <i>Migut.B01748</i> | LG2 | 18190472 | <i>AT4G00490.1</i> | Symbols: BAM2, BMY9                       | beta-amylase 2                                           |
| <i>Migut.B01749</i> | LG2 | 18197073 | <i>AT4G23340.1</i> | Symbols:                                  | 2-oxoglutarate (2OG) and Fe(II)-dependent oxygenase      |
| <i>Migut.B01750</i> | LG2 | 18213497 | <i>AT4G18750.1</i> | Symbols: DOT4                             | Pentatricopeptide repeat (PPR) superfamily               |
| <i>Migut.B01751</i> | LG2 | 18216013 | <i>AT4G00467.1</i> | Symbols:                                  | Calcium-dependent lipid-binding (CaLB domain) family     |
| <i>Migut.B01752</i> | LG2 | 18219350 | <i>AT1G01700.1</i> | Symbols: ATROPGEF2,<br>ROPGEF2            | RHO guanyl-nucleotide exchange                           |
| <i>Migut.B01753</i> | LG2 | 18225241 | <i>AT4G00490.1</i> | Symbols: BAM2, BMY9                       | beta-amylase 2                                           |
| <i>Migut.B01754</i> | LG2 | 18232214 | <i>AT1G32360.1</i> | Symbols:                                  | Zinc finger (CCCH-type) family protein                   |
| <i>Migut.B01755</i> | LG2 | 18235144 | <i>AT3G61370.1</i> | Symbols:                                  | Protein of unknown function (DUF3245)                    |
| <i>Migut.B01756</i> | LG2 | 18237283 | <i>AT2G45900.1</i> | Symbols:                                  | Phosphatidylinositol N-acetylglucosaminyltransferase     |
| <i>Migut.B01757</i> | LG2 | 18247154 | <i>AT1G01690.1</i> | Symbols: ATPRD3, PRD3                     | putative recombination initiation defects                |
| <i>Migut.B01758</i> | LG2 | 18256596 | <i>AT2G45910.1</i> | Symbols:                                  | U-box domain-containing protein kinase family protein    |
| <i>Migut.B01759</i> | LG2 | 18262191 | <i>AT4G05450.1</i> | Symbols: ATMFDX1,<br>MFDX1                | mitochondrial ferredoxin 1                               |
| <i>Migut.B01760</i> | LG2 | 18266954 | <i>AT1G01650.1</i> | Symbols: SPPL4, ATSPPL4                   | SIGNAL PEPTIDE PEPTIDASE-LIKE 4                          |
| <i>Migut.B01761</i> | LG2 | 18271650 | <i>AT3G61415.2</i> | Symbols: ASK21, SK21                      | SKP1-like 21                                             |
| <i>Migut.B01762</i> | LG2 | 18281743 | <i>AT2G45960.1</i> | Symbols: PIP1B, TMP-A,<br>ATHH2, PIP1;2   | plasma membrane intrinsic                                |
| <i>Migut.B01763</i> | LG2 | 18284575 | <i>AT1G01610.1</i> | Symbols: ATGPAT4,<br>GPAT4                | glycerol-3-phosphate acyltransferase                     |
| <i>Migut.B01764</i> | LG2 | 18288930 | <i>AT4G00370.1</i> | Symbols: ANTR2, PHT4;4                    | Major facilitator superfamily protein                    |
| <i>Migut.B01765</i> | LG2 | 18293796 | <i>AT2G45970.1</i> | Symbols: CYP86A8, LCR                     | cytochrome P450, family 86, subfamily                    |
| <i>Migut.B01766</i> | LG2 | 18297203 | <i>AT4G29910.1</i> | Symbols: ORC5, ATORC5                     | origin recognition complex protein                       |
| <i>Migut.B01767</i> | LG2 | 18300374 | <i>AT4G00355.2</i> | Symbols:                                  | unknown protein; BEST Arabidopsis thaliana protein       |
| <i>Migut.B01768</i> | LG2 | 18303574 | <i>AT2G45990.2</i> | Symbols:                                  | unknown protein; FUNCTIONS IN: molecular_function        |
| <i>Migut.B01769</i> | LG2 | 18306431 | <i>AT2G45990.3</i> | Symbols:                                  | unknown protein; FUNCTIONS IN: molecular_function        |
| <i>Migut.B01770</i> | LG2 | 18308707 | <i>AT2G46000.1</i> | Symbols:                                  | FUNCTIONS IN: molecular_function unknown; INVOLVED       |
| <i>Migut.B01771</i> | LG2 | 18312364 | <i>AT3G61440.1</i> | Symbols: ATCYSC1,<br>ARATH;BSAS3;1, CYSC1 | cysteine synthase                                        |

|                     |     |          |                    |                                 |                                                      |
|---------------------|-----|----------|--------------------|---------------------------------|------------------------------------------------------|
| <i>Migut.B01772</i> | LG2 | 18316740 | <i>AT2G46020.2</i> | Symbols: CHR2, ATBRM, BRM, CHA2 | transcription regulatory                             |
| <i>Migut.B01773</i> | LG2 | 18327087 | <i>AT4G11400.1</i> | Symbols:                        | ARID/BRIGHT DNA-binding domain;ELM2 domain protein   |
| <i>Migut.B01774</i> | LG2 | 18331344 | <i>AT4G00340.1</i> | Symbols: RLK4                   | receptor-like protein kinase 4                       |
| <i>Migut.B01775</i> | LG2 | 18338559 | <i>AT5G41350.1</i> | Symbols:                        | RING/U-box superfamily protein                       |
| <i>Migut.B01776</i> | LG2 | 18340784 | <i>AT5G26960.1</i> | Symbols:                        | Galactose oxidase/kelch repeat superfamily protein   |
| <i>Migut.B01777</i> | LG2 | 18344407 | <i>AT4G00330.1</i> | Symbols: CRCK2                  | calmodulin-binding receptor-like cytoplasmic         |
| <i>Migut.B01778</i> | LG2 | 18347618 | <i>AT2G46060.1</i> | Symbols:                        | transmembrane protein-related                        |
| <i>Migut.B01779</i> | LG2 | 18354940 | <i>AT5G28350.1</i> | Symbols:                        | Quinoprotein amine dehydrogenase, beta chain-like;   |
| <i>Migut.B01780</i> | LG2 | 18366197 | <i>AT1G01580.1</i> | Symbols: FRO2, FRD1, ATFRO2     | ferric reduction oxidase 2                           |
| <i>Migut.B01781</i> | LG2 | 18371946 | <i>AT1G01580.1</i> | Symbols: FRO2, FRD1, ATFRO2     | ferric reduction oxidase 2                           |
| <i>Migut.B01782</i> | LG2 | 18379169 | <i>AT1G01580.1</i> | Symbols: FRO2, FRD1, ATFRO2     | ferric reduction oxidase 2                           |
| <i>Migut.B01783</i> | LG2 | 18385339 | <i>AT1G01580.1</i> | Symbols: FRO2, FRD1, ATFRO2     | ferric reduction oxidase 2                           |
| <i>Migut.B01784</i> | LG2 | 18389485 | <i>AT4G00300.2</i> | Symbols:                        | fringe-related protein                               |
| <i>Migut.B01785</i> | LG2 | 18393918 | <i>AT1G01540.2</i> | Symbols:                        | Protein kinase superfamily protein                   |
| <i>Migut.B01786</i> | LG2 | 18400271 | <i>AT4G01370.1</i> | Symbols: ATPMK4, MPK4           | MAP kinase 4                                         |
| <i>Migut.B01787</i> | LG2 | 18405502 | <i>AT5G49690.1</i> | Symbols:                        | UDP-Glycosyltransferase superfamily protein          |
| <i>Migut.B01788</i> | LG2 | 18408047 | <i>AT4G00290.1</i> | Symbols:                        | Mechanosensitive ion channel protein                 |
| <i>Migut.B01789</i> | LG2 | 18413419 | <i>AT2G46090.1</i> | Symbols:                        | Diacylglycerol kinase family protein                 |
| <i>Migut.B01790</i> | LG2 | 18417957 | <i>AT4G01310.1</i> | Symbols:                        | Ribosomal L5P family protein                         |
| <i>Migut.B01791</i> | LG2 | 18420970 | <i>AT4G01290.2</i> | Symbols:                        | unknown protein; FUNCTIONS IN: molecular_function    |
| <i>Migut.B01792</i> | LG2 | 18428129 | <i>AT5G64130.1</i> | Symbols:                        | cAMP-regulated phosphoprotein 19-related protein     |
| <i>Migut.B01793</i> | LG2 | 18431432 | <i>AT1G01500.1</i> | Symbols:                        | Erythronate-4-phosphate dehydrogenase family protein |
| <i>Migut.B01794</i> | LG2 | 18436033 | <i>AT1G01490.2</i> | Symbols:                        | Heavy metal transport/detoxification superfamily     |
| <i>Migut.B01795</i> | LG2 | 18439650 | <i>AT3G61510.1</i> | Symbols: ACS1, AT-ACS1          | ACC synthase 1                                       |
| <i>Migut.B01796</i> | LG2 | 18444293 | <i>AT4G01270.1</i> | Symbols:                        | RING/U-box superfamily protein                       |
| <i>Migut.B01797</i> | LG2 | 18451733 | <i>AT4G01250.1</i> | Symbols: WRKY22, AtWRKY22       | WRKY family transcription factor                     |
| <i>Migut.B01798</i> | LG2 | 18454813 | <i>AT3G61520.1</i> | Symbols:                        | Pentatricopeptide repeat (PPR) superfamily protein   |
| <i>Migut.B01799</i> | LG2 | 18457426 | <i>AT3G61530.2</i> | Symbols: PANB2                  | Phosphoenolpyruvate carboxylase family protein       |
| <i>Migut.B01800</i> | LG2 | 18463415 | <i>AT3G61540.1</i> | Symbols:                        | alpha/beta-Hydrolases superfamily protein            |
| <i>Migut.B01801</i> | LG2 | 18465155 | <i>AT1G14620.1</i> | Symbols: DECOY                  | decoy                                                |
| <i>Migut.B01802</i> | LG2 | 18468469 | <i>AT1G01470.1</i> | Symbols: LEA14, LSR3            | Late embryogenesis abundant protein                  |
| <i>Migut.B01803</i> | LG2 | 18471091 | <i>AT3G61550.1</i> | Symbols:                        | RING/U-box superfamily protein                       |
| <i>Migut.B01804</i> | LG2 | 18473898 | <i>AT4G01240.1</i> | Symbols:                        | S-adenosyl-L-methionine-dependent methyltransferases |
| <i>Migut.B01805</i> | LG2 | 18476740 | <i>AT4G23630.1</i> | Symbols: BTI1, RTNLB1           | VIRB2-interacting protein 1                          |
| <i>Migut.B01806</i> | LG2 | 18479937 | <i>AT2G46180.1</i> | Symbols: GC4                    | golgin candidate 4                                   |
| <i>Migut.B01807</i> | LG2 | 18489227 | <i>AT2G46200.2</i> | Symbols:                        | unknown protein; Has 35333 Blast hits to 34131       |
| <i>Migut.B01808</i> | LG2 | 18497397 | <i>AT2G46200.2</i> | Symbols:                        | unknown protein; Has 35333 Blast hits to 34131       |
| <i>Migut.B01809</i> | LG2 | 18503595 | <i>AT5G52900.1</i> | Symbols:                        | unknown protein; Has 30201 Blast hits to 17322       |
| <i>Migut.B01810</i> | LG2 | 18512384 | <i>AT2G46210.1</i> | Symbols:                        | Fatty acid/sphingolipid desaturase                   |
| <i>Migut.B01811</i> | LG2 | 18514947 | <i>AT5G24090.1</i> | Symbols: ATCHIA, CHIA           | chitinase A                                          |
| <i>Migut.B01812</i> | LG2 | 18516394 | <i>AT2G46220.1</i> | Symbols:                        | Uncharacterized conserved protein (DUF2358)          |
| <i>Migut.B01813</i> | LG2 | 18519856 | <i>AT2G46225.1</i> | Symbols: ABIL1                  | ABI-1-like 1                                         |

|                     |     |          |                    |                                           |                                                                  |
|---------------------|-----|----------|--------------------|-------------------------------------------|------------------------------------------------------------------|
| <i>Migut.B01814</i> | LG2 | 18522685 | <i>AT2G46230.1</i> | Symbols:                                  | PIN domain-like family protein                                   |
| <i>Migut.B01815</i> | LG2 | 18524807 | <i>AT4G01210.1</i> | Symbols:                                  | glycosyl transferase family 1 protein                            |
| <i>Migut.B01816</i> | LG2 | 18546629 | <i>AT3G61590.2</i> | Symbols: HWS                              | Galactose oxidase/kelch repeat superfamily protein               |
| <i>Migut.B01817</i> | LG2 | 18551944 | <i>AT5G41620.1</i> | Symbols:                                  | FUNCTIONS IN: molecular_function unknown; INVOLVED               |
| <i>Migut.B01818</i> | LG2 | 18554123 | <i>AT5G41620.1</i> | Symbols:                                  | FUNCTIONS IN: molecular_function unknown; INVOLVED               |
| <i>Migut.B01819</i> | LG2 | 18556314 | <i>AT5G41650.1</i> | Symbols:                                  | Lactoylglutathione lyase / glyoxalase I family                   |
| <i>Migut.B01820</i> | LG2 | 18559315 | <i>AT3G61600.1</i> | Symbols: ATPOB1, POB1                     | POZ/BTB containin G-protein 1                                    |
| <i>Migut.B01821</i> | LG2 | 18563001 | <i>AT2G04520.1</i> | Symbols:                                  | Nucleic acid-binding, OB-fold-like protein                       |
| <i>Migut.B01822</i> | LG2 | 18564677 | <i>AT5G35680.3</i> | Symbols:                                  | Nucleic acid-binding, OB-fold-like protein                       |
| <i>Migut.B01823</i> | LG2 | 18566012 | <i>AT4G05400.2</i> | Symbols:                                  | copper ion binding                                               |
| <i>Migut.B01824</i> | LG2 | 18569328 | <i>AT4G01150.1</i> | Symbols:                                  | unknown protein; FUNCTIONS IN: molecular_function                |
| <i>Migut.B01825</i> | LG2 | 18572845 | <i>AT4G01140.1</i> | Symbols:                                  | Protein of unknown function (DUF1191)                            |
| <i>Migut.B01826</i> | LG2 | 18573880 | <i>AT4G01130.1</i> | Symbols:                                  | GDSL-like Lipase/Acylhydrolase superfamily protein               |
| <i>Migut.B01827</i> | LG2 | 18576302 | <i>AT4G01130.1</i> | Symbols:                                  | GDSL-like Lipase/Acylhydrolase superfamily protein               |
| <i>Migut.B01828</i> | LG2 | 18584141 | <i>AT2G46270.1</i> | Symbols: GBF3                             | G-box binding factor 3                                           |
| <i>Migut.B01829</i> | LG2 | 18591793 | <i>AT3G61610.1</i> | Symbols:                                  | Galactose mutarotase-like superfamily protein                    |
| <i>Migut.B01830</i> | LG2 | 18595018 | <i>AT3G61620.2</i> | Symbols: RRP41                            | 3'-5'-exoribonuclease family protein                             |
| <i>Migut.B01831</i> | LG2 | 18592505 | <i>AT1G64230.2</i> | Symbols: UBC28                            | ubiquitin-conjugating enzyme 28                                  |
| <i>Migut.B01832</i> | LG2 | 18600965 | <i>AT4G27950.1</i> | Symbols: CRF4                             | cytokinin response factor 4                                      |
| <i>Migut.B01833</i> | LG2 | 18603638 | <i>AT2G16070.2</i> | Symbols: PDV2<br>Symbols: ATMTM1,<br>MTM1 | plastid division2<br>manganese tracking factor for mitochondrial |
| <i>Migut.B01834</i> | LG2 | 18605301 | <i>AT4G27940.1</i> |                                           |                                                                  |
| <i>Migut.B01835</i> | LG2 | 18608351 | <i>AT5G41761.1</i> | Symbols:                                  | unknown protein; FUNCTIONS IN: molecular_function                |
| <i>Migut.B01836</i> | LG2 | 18610136 | <i>AT5G41760.2</i> | Symbols:                                  | Nucleotide-sugar transporter family protein                      |
| <i>Migut.B01837</i> | LG2 | 18614025 | <i>AT1G64300.2</i> | Symbols:                                  | Protein kinase family protein                                    |
| <i>Migut.B01838</i> | LG2 | 18617455 | <i>AT1G61560.2</i> | Symbols: MLO6                             | Seven transmembrane MLO family protein                           |
| <i>Migut.B01839</i> | LG2 | 18618094 | <i>AT4G01100.1</i> | Symbols: ADNT1                            | adenine nucleotide transporter 1                                 |
| <i>Migut.B01840</i> | LG2 | 18625650 | <i>AT2G46370.2</i> | Symbols: JAR1, FIN219                     | Auxin-responsive GH3 family protein                              |
| <i>Migut.B01841</i> | LG2 | 18633142 | <i>AT3G61660.1</i> | Symbols:                                  | unknown protein; BEST Arabidopsis thaliana protein               |
| <i>Migut.B01842</i> | LG2 | 18639376 | <i>AT3G61670.1</i> | Symbols:                                  | Protein of unknown function (DUF3133)                            |
| <i>Migut.B01843</i> | LG2 | 18646285 | <i>AT3G61670.1</i> | Symbols:                                  | Protein of unknown function (DUF3133)                            |
| <i>Migut.B01844</i> | LG2 | 18650663 | <i>AT2G46390.1</i> | Symbols:                                  | unknown protein; FUNCTIONS IN: molecular_function                |
| <i>Migut.B01845</i> | LG2 | 18658775 | <i>AT4G01070.1</i> | Symbols: GT72B1,<br>UGT72B1               | UDP-Glycosyltransferase superfamily                              |
| <i>Migut.B01846</i> | LG2 | 18666837 | <i>AT2G45400.1</i> | Symbols: BEN1                             | NAD(P)-binding Rossmann-fold superfamily protein                 |
| <i>Migut.B01847</i> | LG2 | 18668773 | <i>AT4G11070.1</i> | Symbols: WRKY41,<br>AtWRKY41              | WRKY family transcription factor                                 |
| <i>Migut.B01848</i> | LG2 | 18674282 | <i>AT1G05950.1</i> | Symbols:                                  | unknown protein; Has 50 Blast hits to 45 proteins                |
| <i>Migut.B01849</i> | LG2 | 18679203 | <i>AT4G01060.2</i> | Symbols: ETC3, CPL3                       | CAPRICE-like MYB3                                                |
| <i>Migut.B01850</i> | LG2 | 18681823 | <i>AT4G01037.1</i> | Symbols: WTF1, AtWTF1                     | Ubiquitin carboxyl-terminal hydrolase                            |
| <i>Migut.B01851</i> | LG2 | 18687008 | <i>AT4G01030.1</i> | Symbols:                                  | pentatricopeptide (PPR) repeat-containing protein                |
| <i>Migut.B01852</i> | LG2 | 18690020 | <i>AT1G01350.1</i> | Symbols:                                  | Zinc finger (CCCH-type/C3HC4-type RING finger)                   |
| <i>Migut.B01853</i> | LG2 | 18692605 | <i>AT1G01360.1</i> | Symbols: RCAR1, PYL9                      | regulatory component of ABA receptor                             |
| <i>Migut.B01854</i> | LG2 | 18702011 | <i>AT3G61690.1</i> | Symbols:                                  | nucleotidyltransferases                                          |
| <i>Migut.B01855</i> | LG2 | 18707132 | <i>AT5G63630.1</i> | Symbols:                                  | P-loop containing nucleoside triphosphate hydrolases             |
| <i>Migut.B01856</i> | LG2 | 18719763 | <i>AT2G46420.1</i> | Symbols:                                  | Plant protein 1589 of unknown function                           |

|                     |     |          |                    |                                                                       |                                                            |
|---------------------|-----|----------|--------------------|-----------------------------------------------------------------------|------------------------------------------------------------|
| <i>Migut.B01857</i> | LG2 | 18722866 | <i>AT4G23850.1</i> | Symbols: LACS4                                                        | AMP-dependent synthetase and ligase family                 |
| <i>Migut.B01858</i> | LG2 | 18728523 | <i>AT5G59310.1</i> | Symbols: LTP4                                                         | lipid transfer protein 4                                   |
| <i>Migut.B01859</i> | LG2 | 18729433 | <i>AT3G61710.1</i> | Symbols: ATATG6, ATG6, BECLIN1, AtBECLIN1                             | AUTOPHAGY 6                                                |
| <i>Migut.B01860</i> | LG2 | 18734573 | <i>AT3G28460.1</i> | Symbols:                                                              | methyltransferases                                         |
| <i>Migut.B01861</i> | LG2 | 18736739 | <i>AT2G25410.1</i> | Symbols:                                                              | RING/U-box superfamily protein                             |
| <i>Migut.B01862</i> | LG2 | 18741031 | <i>AT5G36001.1</i> | Symbols:                                                              | RING/U-box superfamily protein                             |
| <i>Migut.B01863</i> | LG2 | 18743116 | <i>AT2G46494.1</i> | Symbols:                                                              | RING/U-box superfamily protein                             |
| <i>Migut.B01864</i> | LG2 | 18745303 | <i>AT2G46495.1</i> | Symbols:                                                              | RING/U-box superfamily protein                             |
| <i>Migut.B01865</i> | LG2 | 18746782 | <i>AT2G46494.1</i> | Symbols:                                                              | RING/U-box superfamily protein                             |
| <i>Migut.B01866</i> | LG2 | 18748330 | <i>AT5G53110.1</i> | Symbols:                                                              | RING/U-box superfamily protein                             |
| <i>Migut.B01867</i> | LG2 | 18750643 | <i>AT2G46494.1</i> | Symbols:                                                              | RING/U-box superfamily protein                             |
| <i>Migut.B01868</i> | LG2 | 18752037 | <i>AT2G46495.1</i> | Symbols:                                                              | RING/U-box superfamily protein                             |
| <i>Migut.B01869</i> | LG2 | 18754386 | <i>AT2G46495.1</i> | Symbols:                                                              | RING/U-box superfamily protein                             |
| <i>Migut.B01870</i> | LG2 | 18756900 | <i>AT5G36000.1</i> | Symbols:                                                              | BEST Arabidopsis thaliana protein match is: reduced        |
| <i>Migut.B01871</i> | LG2 | 18764416 | <i>AT1G01320.2</i> | Symbols:                                                              | Tetratricopeptide repeat (TPR)-like superfamily            |
| <i>Migut.B01872</i> | LG2 | 18777919 | <i>AT5G42080.1</i> | Symbols: ADL1, ADL1A, AG68, DRP1A, RSW9, DL1                          | dynamnin-like                                              |
| <i>Migut.B01873</i> | LG2 | 18785784 | <i>AT3G61770.1</i> | Symbols:<br>Symbols: ATP14K<br>GAMMA 4, UBDK<br>GAMMA 4, PI4K GAMMA 4 | Acid phosphatase/vanadium-dependent haloperoxidase-related |
| <i>Migut.B01874</i> | LG2 | 18788261 | <i>AT2G46500.2</i> | Symbols:                                                              | phosphoinositide                                           |
| <i>Migut.B01875</i> | LG2 | 18792146 | <i>AT4G23930.1</i> | Symbols:                                                              | Late embryogenesis abundant (LEA) hydroxyproline-rich      |
| <i>Migut.B01876</i> | LG2 | 18793180 | <i>AT3G61780.1</i> | Symbols: emb1703                                                      | embryo defective 1703                                      |
| <i>Migut.B01877</i> | LG2 | 18798120 | <i>AT3G61790.1</i> | Symbols:                                                              | Protein with RING/U-box and TRAF-like domains              |
| <i>Migut.B01878</i> | LG2 | 18801743 | <i>AT3G61800.1</i> | Symbols:                                                              | CONTAINS InterPro DOMAIN/s: Protein of unknown             |
| <i>Migut.B01879</i> | LG2 | 18805732 | <i>AT1G01300.1</i> | Symbols:                                                              | Eukaryotic aspartyl protease family protein                |
| <i>Migut.B01880</i> | LG2 | 18809612 | <i>AT1G01290.2</i> | Symbols: CNX3                                                         | cofactor of nitrate reductase and xanthine                 |
| <i>Migut.B01881</i> | LG2 | 18811924 | <i>AT1G01280.1</i> | Symbols: CYP703A2, CYP703                                             | cytochrome P450, family 703, subfamily                     |
| <i>Migut.B01882</i> | LG2 | 18814283 | <i>AT4G30990.1</i> | Symbols:                                                              | ARM repeat superfamily protein                             |
| <i>Migut.B01883</i> | LG2 | 18839623 | <i>AT4G00980.1</i> | Symbols:                                                              | zinc knuckle (CCHC-type) family protein                    |
| <i>Migut.B01884</i> | LG2 | 18842701 | <i>AT2G46510.1</i> | Symbols: ATAIB, AIB                                                   | ABA-inducible BHLH-type transcription                      |
| <i>Migut.B01885</i> | LG2 | 18849344 | <i>AT2G46520.1</i> | Symbols:                                                              | cellular apoptosis susceptibility protein, putative        |
| <i>Migut.B01886</i> | LG2 | 18857515 | <i>AT4G23980.2</i> | Symbols: ARF9                                                         | auxin response factor 9                                    |
| <i>Migut.B01887</i> | LG2 | 18863112 | <i>AT5G53030.2</i> | Symbols:                                                              | unknown protein; CONTAINS InterPro DOMAIN/s: Protein       |
| <i>Migut.B01888</i> | LG2 | 18864357 | <i>AT2G46550.1</i> | Symbols:                                                              | unknown protein; BEST Arabidopsis thaliana protein         |
| <i>Migut.B01889</i> | LG2 | 18866988 | <i>AT1G01220.1</i> | Symbols: FKGP, AtFKGP                                                 | L-fucokinase/GDP-L-fucose pyrophosphorylase                |
| <i>Migut.B01890</i> | LG2 | 18872521 | <i>AT2G46560.1</i> | Symbols:                                                              | transducin family protein / WD-40 repeat family            |
| <i>Migut.B01891</i> | LG2 | 18884500 | <i>AT4G09510.1</i> | Symbols: CINV2                                                        | cytosolic invertase 2                                      |
| <i>Migut.B01892</i> | LG2 | 18887720 | <i>AT4G10810.1</i> | Symbols:                                                              | unknown protein; FUNCTIONS IN: molecular_function          |
| <i>Migut.B01893</i> | LG2 | 18888912 | <i>AT5G08510.1</i> | Symbols:                                                              | Pentatricopeptide repeat (PPR) superfamily protein         |
| <i>Migut.B01894</i> | LG2 | 18892548 | <i>AT2G46590.1</i> | Symbols: DAG2                                                         | Dof-type zinc finger DNA-binding family protein            |
| <i>Migut.B01895</i> | LG2 | 18895613 | <i>AT1G01230.1</i> | Symbols:                                                              | ORMDL family protein                                       |
| <i>Migut.B01896</i> | LG2 | 18903851 | <i>AT4G00910.1</i> | Symbols:                                                              | Aluminium activated malate transporter family protein      |
| <i>Migut.B01897</i> | LG2 | 18906026 | <i>AT1G01225.1</i> | Symbols:                                                              | NC domain-containing protein-related                       |



|                     |     |          |                    |                                        |                                                            |
|---------------------|-----|----------|--------------------|----------------------------------------|------------------------------------------------------------|
| <i>Migut.B01898</i> | LG2 | 18908130 | <i>AT3G18750.3</i> | Symbols: WNK6                          | with no lysine (K) kinase 6                                |
| <i>Migut.B01899</i> | LG2 | 18912155 | <i>AT4G07950.1</i> | Symbols:                               | DNA-directed RNA polymerase, subunit M, archaeal           |
| <i>Migut.B01900</i> | LG2 | 18914578 | <i>AT2G46600.1</i> | Symbols:                               | Calcium-binding EF-hand family protein                     |
| <i>Migut.B01901</i> | LG2 | 18915364 | <i>AT3G61860.1</i> | Symbols: ATRSP31, RSP31, At-RS31, RS31 | RNA-binding (RRM/RBD/RNP                                   |
| <i>Migut.B01902</i> | LG2 | 18920798 | <i>AT4G00900.1</i> | Symbols: ECA2, ATECA2                  | ER-type Ca <sup>2+</sup> -ATPase 2                         |
| <i>Migut.B01903</i> | LG2 | 18925004 | <i>AT1G76390.2</i> | Symbols:                               | ARM repeat superfamily protein                             |
| <i>Migut.B01904</i> | LG2 | 18939820 | <i>AT4G09650.1</i> | Symbols: ATPD                          | ATP synthase delta-subunit gene                            |
| <i>Migut.B01905</i> | LG2 | 18942891 | <i>AT1G01200.1</i> | Symbols: ATRABA3, ATRAB-A3, RABA3      | RAB GTPase homolog A3                                      |
| <i>Migut.B01906</i> | LG2 | 18949300 |                    |                                        |                                                            |
| <i>Migut.B01907</i> | LG2 | 18955077 | <i>AT3G61880.2</i> | Symbols: CYP78A9                       | cytochrome p450 78a9                                       |
| <i>Migut.B01908</i> | LG2 | 18963031 | <i>AT3G52590.1</i> | Symbols: UBQ1, EMB2167, ERD16, HAP4    | ubiquitin extension protein                                |
| <i>Migut.B01909</i> | LG2 | 18971780 | <i>AT2G46700.2</i> | Symbols: ATCRK3, CRK3                  | CDPK-related kinase 3                                      |
| <i>Migut.B01910</i> | LG2 | 18979804 | <i>AT5G60490.1</i> | Symbols: FLA12                         | FASCICLIN-like arabinogalactan-protein 12                  |
| <i>Migut.B01911</i> | LG2 | 18989731 | <i>AT2G46710.1</i> | Symbols:                               | Rho GTPase activating protein with PAK-box/P21-Rho-binding |
| <i>Migut.B01912</i> | LG2 | 18996298 | <i>AT4G00870.1</i> | Symbols:                               | basic helix-loop-helix (bHLH) DNA-binding superfamily      |
| <i>Migut.B01913</i> | LG2 | 18999476 | <i>AT1G01180.1</i> | Symbols:                               | S-adenosyl-L-methionine-dependent methyltransferases       |
| <i>Migut.B01914</i> | LG2 | 19009515 | <i>AT1G01180.1</i> | Symbols:                               | S-adenosyl-L-methionine-dependent methyltransferases       |
| <i>Migut.B01915</i> | LG2 | 19042200 | <i>AT4G00840.1</i> | Symbols:                               | DHHC-type zinc finger family protein                       |
| <i>Migut.B01916</i> | LG2 | 19049590 | <i>AT1G01140.1</i> | Symbols: CIPK9, SnRK3.12, PKS6         | CBL-interacting protein kinase                             |
| <i>Migut.B01917</i> | LG2 | 19054791 | <i>AT1G01120.1</i> | Symbols: KCS1                          | 3-ketoacyl-CoA synthase 1                                  |
| <i>Migut.B01918</i> | LG2 | 19057634 |                    |                                        |                                                            |
| <i>Migut.B01919</i> | LG2 | 19058190 | <i>AT4G00830.2</i> | Symbols:                               | RNA-binding (RRM/RBD/RNP motifs) family protein            |
| <i>Migut.B01920</i> | LG2 | 19062993 | <i>AT2G46760.1</i> | Symbols:                               | D-arabinono-1,4-lactone oxidase family protein             |
| <i>Migut.D00335</i> | LG4 | 1516251  | <i>AT1G09550.1</i> | Symbols:                               | Pectinacetyltransferase family protein                     |
| <i>Migut.D00336</i> | LG4 | 1518932  | <i>AT3G51895.1</i> | Symbols: SULTR3;1, AST12               | sulfate transporter 3;1                                    |
| <i>Migut.D00337</i> | LG4 | 1529891  | <i>AT3G63280.2</i> | Symbols: ATNEK4, NEK4                  | NIMA-related kinase 4                                      |
| <i>Migut.D00338</i> | LG4 | 1534361  | <i>AT3G63290.1</i> | Symbols:                               | 2-oxoglutarate (2OG) and Fe(II)-dependent oxygenase        |
| <i>Migut.D00339</i> | LG4 | 1538450  | <i>AT3G63300.1</i> | Symbols: FKD1                          | FORKED 1                                                   |
| <i>Migut.D00340</i> | LG4 | 1550406  | <i>AT3G26922.1</i> | Symbols:                               | F-box/RNI-like superfamily protein                         |
| <i>Migut.D00341</i> | LG4 | 1554914  | <i>AT1G03160.2</i> | Symbols: FZL                           | FZO-like                                                   |
| <i>Migut.D00342</i> | LG4 | 1559370  | <i>AT2G38840.1</i> | Symbols:                               | Guanylate-binding family protein                           |
| <i>Migut.D00343</i> | LG4 | 1565287  | <i>AT2G38830.1</i> | Symbols:                               | Ubiquitin-conjugating enzyme/RWD-like protein              |
| <i>Migut.D00344</i> | LG4 | 1571622  | <i>AT3G22970.1</i> | Symbols:                               | Protein of unknown function (DUF506)                       |
| <i>Migut.D00345</i> | LG4 | 1575350  | <i>AT3G54560.1</i> | Symbols: HTA11                         | histone H2A 11                                             |
| <i>Migut.D00346</i> | LG4 | 1578682  | <i>AT1G03055.1</i> | Symbols:                               | unknown protein; BEST Arabidopsis thaliana protein         |
| <i>Migut.D00347</i> | LG4 | 1583724  | <i>AT3G63430.1</i> | Symbols:                               | unknown protein; BEST Arabidopsis thaliana protein         |
| <i>Migut.D00348</i> | LG4 | 1592814  | <i>AT2G38290.1</i> | Symbols: ATAMT2, AMT2;1, AMT2          | ammonium transporter 2                                     |
| <i>Migut.D00349</i> | LG4 | 1597623  | <i>AT3G63410.1</i> | Symbols: APG1, VTE3, IEP37, E37        | S-adenosyl-L-methionine-dependent                          |
| <i>Migut.D00350</i> | LG4 | 1599800  | <i>AT3G63400.2</i> | Symbols:                               | Cyclophilin-like peptidyl-prolyl cis-trans isomerase       |
| <i>Migut.D00351</i> | LG4 | 1606446  | <i>AT5G37780.1</i> | Symbols: CAM1, TCH1, ACAM-1            | calmodulin 1                                               |

|                     |     |         |                    |                                                  |                                                                                     |
|---------------------|-----|---------|--------------------|--------------------------------------------------|-------------------------------------------------------------------------------------|
| <i>Migut.D00352</i> | LG4 | 1607799 | <i>AT3G63380.1</i> | Symbols:<br>Symbols: ERMO2,<br>SEC24A            | ATPase E1-E2 type family protein / haloacid<br>dehalogenase-like                    |
| <i>Migut.D00353</i> | LG4 | 1619021 | <i>AT3G07100.1</i> |                                                  | Sec23/Sec24 protein transport family                                                |
| <i>Migut.D00354</i> | LG4 | 1632108 | <i>AT3G63370.1</i> | Symbols: OTP86                                   | Tetratricopeptide repeat (TPR)-like superfamily                                     |
| <i>Migut.D00355</i> | LG4 | 1636125 | <i>AT1G03060.1</i> | Symbols: SPI                                     | Beige/BEACH domain ;WD domain, G-beta repeat                                        |
| <i>Migut.D00356</i> | LG4 | 1656830 | <i>AT5G19840.1</i> | Symbols:                                         | 2-oxoglutarate (2OG) and Fe(II)-dependent oxygenase                                 |
| <i>Migut.D00357</i> | LG4 | 1665434 | <i>AT1G03840.1</i> | Symbols: MGP<br>Symbols: AT-HSFA6B,<br>HSFA6B    | C2H2 and C2HC zinc fingers superfamily protein<br>heat shock transcription factor   |
| <i>Migut.D00358</i> | LG4 | 1671377 | <i>AT3G22830.1</i> |                                                  |                                                                                     |
| <i>Migut.D00359</i> | LG4 | 1674940 | <i>AT3G63340.1</i> | Symbols:                                         | Protein phosphatase 2C family protein                                               |
| <i>Migut.D00360</i> | LG4 | 1684426 | <i>AT4G02680.1</i> | Symbols: EOL1                                    | ETO1-like 1                                                                         |
| <i>Migut.D00361</i> | LG4 | 1690476 | <i>AT3G63340.1</i> | Symbols:                                         | Protein phosphatase 2C family protein                                               |
| <i>Migut.D00362</i> | LG4 | 1707853 | <i>AT3G49790.1</i> | Symbols:                                         | Carbohydrate-binding protein                                                        |
| <i>Migut.D00363</i> | LG4 | 1708637 | <i>AT2G25800.1</i> | Symbols:                                         | Protein of unknown function (DUF810)                                                |
| <i>Migut.D00364</i> | LG4 | 1710687 | <i>AT5G44690.1</i> | Symbols:                                         | unknown protein; BEST Arabidopsis thaliana protein                                  |
| <i>Migut.D00365</i> | LG4 | 1711450 | <i>AT3G63310.1</i> | Symbols: BIL4                                    | Bax inhibitor-1 family protein                                                      |
| <i>Migut.D00366</i> | LG4 | 1713306 | <i>AT1G03070.2</i> | Symbols:                                         | Bax inhibitor-1 family protein                                                      |
| <i>Migut.D00367</i> | LG4 | 1715317 | <i>AT4G02620.1</i> | Symbols:                                         | vacuolar ATPase subunit F family protein                                            |
| <i>Migut.D00368</i> | LG4 | 1717826 | <i>AT3G54640.1</i> | Symbols: TSA1, TRP3                              | tryptophan synthase alpha chain                                                     |
| <i>Migut.D00369</i> | LG4 | 1721348 | <i>AT5G43680.2</i> | Symbols:                                         | unknown protein; EXPRESSED IN: 21 plant structures;                                 |
| <i>Migut.D00370</i> | LG4 | 1724532 | <i>AT4G02590.2</i> | Symbols: UNE12                                   | basic helix-loop-helix (bHLH) DNA-binding                                           |
| <i>Migut.D00371</i> | LG4 | 1729514 | <i>AT4G02580.1</i> | Symbols:<br>Symbols: ATAUX2-11,<br>IAA4          | NADH-ubiquinone oxidoreductase 24 kDa subunit,<br>AUX/IAA transcriptional regulator |
| <i>Migut.D00372</i> | LG4 | 1735387 | <i>AT5G43700.1</i> |                                                  |                                                                                     |
| <i>Migut.D00373</i> | LG4 | 1748817 | <i>AT3G04730.1</i> | Symbols: IAA16                                   | indoleacetic acid-induced protein 16                                                |
| <i>Migut.D00374</i> | LG4 | 1751894 | <i>AT1G03030.1</i> | Symbols:                                         | P-loop containing nucleoside triphosphate hydrolases                                |
| <i>Migut.D00375</i> | LG4 | 1755995 | <i>AT3G54650.1</i> | Symbols: FBL17<br>Symbols: GR, EMB2360,<br>ATGR2 | RNI-like superfamily protein<br>glutathione reductase                               |
| <i>Migut.D00376</i> | LG4 | 1760601 | <i>AT3G54660.1</i> |                                                  |                                                                                     |
| <i>Migut.D00377</i> | LG4 | 1765355 | <i>AT1G06790.1</i> | Symbols:                                         | RNA polymerase Rpb7 N-terminal domain-containing                                    |
| <i>Migut.D00378</i> | LG4 | 1774110 | <i>AT2G30570.1</i> | Symbols: PSBW                                    | photosystem II reaction center W                                                    |
| <i>Migut.D00379</i> | LG4 | 1775389 | <i>AT1G06780.1</i> | Symbols: GAUT6                                   | galacturonosyltransferase 6                                                         |
| <i>Migut.D00380</i> | LG4 | 1784774 | <i>AT2G30580.1</i> | Symbols: DRIP2                                   | DREB2A-interacting protein 2                                                        |
| <i>Migut.D00381</i> | LG4 | 1790054 | <i>AT1G55190.1</i> | Symbols: PRA1.F2, PRA7                           | PRA1 (Prenylated rab acceptor) family                                               |
| <i>Migut.D00382</i> | LG4 | 1791279 | <i>AT3G04710.2</i> | Symbols: TPR10                                   | ankyrin repeat family protein                                                       |
| <i>Migut.D00383</i> | LG4 | 1794477 | <i>AT3G04710.1</i> | Symbols: TPR10                                   | ankyrin repeat family protein                                                       |
| <i>Migut.D00384</i> | LG4 | 1798778 | <i>AT3G04710.1</i> | Symbols: TPR10                                   | ankyrin repeat family protein                                                       |
| <i>Migut.D00385</i> | LG4 | 1801791 | <i>AT1G08230.2</i> | Symbols:                                         | Transmembrane amino acid transporter family protein                                 |
| <i>Migut.D00386</i> | LG4 | 1805215 | <i>AT1G06760.1</i> | Symbols:                                         | winged-helix DNA-binding transcription factor family                                |
| <i>Migut.D00387</i> | LG4 | 1807979 | <i>AT2G30590.1</i> | Symbols: WRKY21                                  | WRKY DNA-binding protein 21                                                         |
| <i>Migut.D00388</i> | LG4 | 1809108 | <i>AT3G49100.1</i> | Symbols:                                         | Signal recognition particle, SRP9/SRP14 subunit                                     |
| <i>Migut.D00389</i> | LG4 | 1815877 | <i>AT2G30620.2</i> | Symbols:                                         | winged-helix DNA-binding transcription factor family                                |
| <i>Migut.D00390</i> | LG4 | 1818896 | <i>AT1G06750.1</i> | Symbols:                                         | P-loop containing nucleoside triphosphate hydrolases                                |
| <i>Migut.D00391</i> | LG4 | 1825330 | <i>AT3G22470.1</i> | Symbols:                                         | Pentatricopeptide repeat (PPR) superfamily protein                                  |
| <i>Migut.D00392</i> | LG4 | 1830095 | <i>AT2G24950.1</i> | Symbols:                                         | Protein of Unknown Function (DUF239)                                                |
| <i>Migut.D00393</i> | LG4 | 1831950 | <i>AT1G06620.1</i> | Symbols:                                         | 2-oxoglutarate (2OG) and Fe(II)-dependent oxygenase                                 |
| <i>Migut.D00394</i> | LG4 | 1834339 | <i>AT1G06730.1</i> | Symbols:                                         | pfkB-like carbohydrate kinase family protein                                        |

|                     |     |         |                    |                                      |                                                       |
|---------------------|-----|---------|--------------------|--------------------------------------|-------------------------------------------------------|
| <i>Migut.D00395</i> | LG4 | 1838073 | <i>AT4G19540.1</i> | Symbols: INDL                        | IND1(iron-sulfur protein required for NADH            |
| <i>Migut.D00396</i> | LG4 | 1853057 | <i>AT1G08800.2</i> | Symbols:                             | Protein of unknown function, DUF593                   |
| <i>Migut.D00397</i> | LG4 | 1857061 | <i>AT5G63450.1</i> | Symbols: CYP94B1                     | cytochrome P450, family 94, subfamily B,              |
| <i>Migut.D00398</i> | LG4 | 1860096 | <i>AT5G43580.1</i> | Symbols:                             | Serine protease inhibitor, potato inhibitor I-type    |
| <i>Migut.D00399</i> | LG4 | 1862157 | <i>AT2G38870.1</i> | Symbols:                             | Serine protease inhibitor, potato inhibitor I-type    |
| <i>Migut.D00400</i> | LG4 | 1864229 | <i>AT2G38870.1</i> | Symbols:                             | Serine protease inhibitor, potato inhibitor I-type    |
| <i>Migut.D00401</i> | LG4 | 1865269 | <i>AT4G16430.1</i> | Symbols:                             | basic helix-loop-helix (bHLH) DNA-binding superfamily |
| <i>Migut.D00402</i> | LG4 | 1876683 | <i>AT1G54560.1</i> | Symbols: XIE, ATXIE                  | Myosin family protein with Dil domain                 |
| <i>Migut.D00403</i> | LG4 | 1886662 | <i>AT2G42410.1</i> | Symbols: ZFP11, ATZFP11              | zinc finger protein 11                                |
| <i>Migut.D00404</i> | LG4 | 1890523 | <i>AT5G43540.1</i> | Symbols:                             | C2H2 and C2HC zinc fingers superfamily protein        |
| <i>Migut.D00405</i> | LG4 | 1891694 | <i>AT3G55600.1</i> | Symbols:                             | Membrane fusion protein Use1                          |
| <i>Migut.D00406</i> | LG4 | 1895021 | <i>AT3G58180.1</i> | Symbols:                             | ARM repeat superfamily protein                        |
| <i>Migut.D00407</i> | LG4 | 1897706 | <i>AT2G31320.1</i> | Symbols: PARP2, ATPARP2              | poly(ADP-ribose) polymerase 2                         |
| <i>Migut.D00408</i> | LG4 | 1906435 | <i>AT3G58190.1</i> | Symbols: LBD29, ASL16                | lateral organ boundaries-domain 29                    |
| <i>Migut.D00409</i> | LG4 | 1911045 | <i>AT2G26200.1</i> | Symbols:                             | S-adenosyl-L-methionine-dependent methyltransferases  |
| <i>Migut.D00410</i> | LG4 | 1914922 | <i>AT5G11980.1</i> | Symbols:                             | conserved oligomeric Golgi complex component-related  |
| <i>Migut.D00411</i> | LG4 | 1919024 | <i>AT5G12000.1</i> | Symbols:                             | Protein kinase protein with adenine nucleotide        |
| <i>Migut.D00412</i> | LG4 | 1927381 | <i>AT5G52820.1</i> | Symbols:                             | WD-40 repeat family protein / notchless protein,      |
| <i>Migut.D00413</i> | LG4 | 1933231 | <i>AT1G19800.1</i> | Symbols: TGD1                        | trigalactosyldiacylglycerol 1                         |
| <i>Migut.D00414</i> | LG4 | 1935957 | <i>AT2G31260.1</i> | Symbols: APG9, ATAPG9                | autophagy 9 (APG9)                                    |
| <i>Migut.D00415</i> | LG4 | 1941865 | <i>AT2G31240.1</i> | Symbols:                             | Tetratricopeptide repeat (TPR)-like superfamily       |
| <i>Migut.D00416</i> | LG4 | 1945030 | <i>AT5G43420.1</i> | Symbols:                             | RING/U-box superfamily protein                        |
| <i>Migut.D00417</i> | LG4 | 1949160 | <i>AT4G10490.1</i> | Symbols:                             | 2-oxoglutarate (2OG) and Fe(II)-dependent oxygenase   |
| <i>Migut.D00418</i> | LG4 | 1952111 | <i>AT1G04370.1</i> | Symbols: ATERF14, ERF14              | Ethylene-responsive element binding                   |
| <i>Migut.D00419</i> | LG4 | 1957133 | <i>AT3G23230.1</i> | Symbols:                             | Integrase-type DNA-binding superfamily protein        |
| <i>Migut.D00420</i> | LG4 | 1961654 | <i>AT3G23240.1</i> | Symbols: ERF1, ATERF1                | ethylene response factor 1                            |
| <i>Migut.D00421</i> | LG4 | 1963243 | <i>AT4G24490.2</i> | Symbols:                             | RAB geranylgeranyl transferase alpha subunit 1        |
| <i>Migut.D00422</i> | LG4 | 1969583 | <i>AT3G54700.1</i> | Symbols: PHT1;7                      | phosphate transporter 1;7                             |
| <i>Migut.D00423</i> | LG4 | 1971776 | <i>AT4G14385.2</i> | Symbols:                             | FUNCTIONS IN: molecular_function unknown; INVOLVED    |
| <i>Migut.D00424</i> | LG4 | 1975065 | <i>AT2G31190.1</i> | Symbols: RUS2, WXR1                  | Protein of unknown function, DUF647                   |
| <i>Migut.D00425</i> | LG4 | 1978868 | <i>AT5G44120.3</i> | Symbols: CRA1, ATCRA1, CRU1          | RmlC-like cupins superfamily                          |
| <i>Migut.D00426</i> | LG4 | 1982709 | <i>AT5G44120.3</i> | Symbols: CRA1, ATCRA1, CRU1          | RmlC-like cupins superfamily                          |
| <i>Migut.D00427</i> | LG4 | 1994096 | <i>AT1G30690.2</i> | Symbols:                             | Sec14p-like phosphatidylinositol transfer family      |
| <i>Migut.D00428</i> | LG4 | 1996692 | <i>AT1G06210.1</i> | Symbols:                             | ENTH/VHS/GAT family protein                           |
| <i>Migut.D00429</i> | LG4 | 1998894 | <i>AT2G31140.1</i> | Symbols:                             | Peptidase S24/S26A/S26B/S26C family protein           |
| <i>Migut.D00430</i> | LG4 | 2001391 | <i>AT1G06190.1</i> | Symbols:                             | Rho termination factor                                |
| <i>Migut.D00431</i> | LG4 | 2003939 | <i>AT5G16320.1</i> | Symbols: FRL1                        | FRIGIDA like 1                                        |
| <i>Migut.D00432</i> | LG4 | 2009673 |                    |                                      |                                                       |
| <i>Migut.D00433</i> | LG4 | 2011639 | <i>AT5G27220.1</i> | Symbols:                             | Frigida-like protein                                  |
| <i>Migut.D00434</i> | LG4 | 2019866 | <i>AT3G54790.2</i> | Symbols:                             | ARM repeat superfamily protein                        |
| <i>Migut.D00435</i> | LG4 | 2025830 | <i>AT2G31160.1</i> | Symbols: LSH3                        | Protein of unknown function (DUF640)                  |
| <i>Migut.D00436</i> | LG4 | 2038564 | <i>AT1G08620.2</i> | Symbols: PKDM7D<br>Symbols: anac074, | Transcription factor jumonji (jmi) family             |
| <i>Migut.D00437</i> | LG4 | 2044260 | <i>AT4G28530.1</i> | NAC074                               | NAC domain containing protein 74                      |

|                     |     |         |                    |                                              |                                                                         |
|---------------------|-----|---------|--------------------|----------------------------------------------|-------------------------------------------------------------------------|
| <i>Migut.D00438</i> | LG4 | 2050188 | <i>AT2G20495.1</i> | Symbols:                                     | CONTAINS InterPro DOMAIN/s: Serine-threonine protein                    |
| <i>Migut.D00439</i> | LG4 | 2053497 | <i>AT4G21150.3</i> | Symbols: HAP6                                | ribophorin II (RPN2) family protein                                     |
| <i>Migut.D00440</i> | LG4 | 2060840 | <i>AT1G03900.1</i> | Symbols: ATNAP4, NAP4                        | non-intrinsic ABC protein 4                                             |
| <i>Migut.D00441</i> | LG4 | 2070576 | <i>AT1G03905.1</i> | Symbols:                                     | P-loop containing nucleoside triphosphate hydrolases                    |
| <i>Migut.D00442</i> | LG4 | 2074533 | <i>AT2G20470.1</i> | Symbols:                                     | AGC (cAMP-dependent, cGMP-dependent and protein                         |
| <i>Migut.D00443</i> | LG4 | 2079764 | <i>AT3G54220.1</i> | Symbols: SCR, SGR1                           | GRAS family transcription factor                                        |
| <i>Migut.D00444</i> | LG4 | 2081646 | <i>AT4G28540.1</i> | Symbols: CKL6, PAK1                          | casein kinase I-like 6                                                  |
| <i>Migut.D00445</i> | LG4 | 2097629 | <i>AT4G28540.1</i> | Symbols: CKL6, PAK1                          | casein kinase I-like 6                                                  |
| <i>Migut.D00446</i> | LG4 | 2104163 | <i>AT1G03950.1</i> | Symbols: VPS2.3                              | vacuolar protein sorting-associated protein                             |
| <i>Migut.D00447</i> | LG4 | 2106585 | <i>AT4G27090.1</i> | Symbols:                                     | Ribosomal protein L14                                                   |
| <i>Migut.D00448</i> | LG4 | 2111830 | <i>AT4G28550.1</i> | Symbols:                                     | Ypt/Rab-GAP domain of gyp1p superfamily protein                         |
| <i>Migut.D00449</i> | LG4 | 2115327 | <i>AT2G33470.2</i> | Symbols: GLTP1                               | glycolipid transfer protein 1                                           |
| <i>Migut.D00450</i> | LG4 | 2118882 | <i>AT2G20430.1</i> | Symbols: RIC6                                | ROP-interactive CRIB motif-containing protein                           |
| <i>Migut.D00451</i> | LG4 | 2122738 | <i>AT4G28560.1</i> | Symbols: RIC7                                | ROP-interactive CRIB motif-containing protein                           |
| <i>Migut.D00452</i> | LG4 | 2136911 | <i>AT4G28570.1</i> | Symbols:                                     | Long-chain fatty alcohol dehydrogenase family protein                   |
| <i>Migut.D00453</i> | LG4 | 2141037 | <i>AT4G28570.1</i> | Symbols:                                     | Long-chain fatty alcohol dehydrogenase family protein                   |
| <i>Migut.D00454</i> | LG4 | 2144619 | <i>AT2G20420.1</i> | Symbols:                                     | ATP citrate lyase (ACL) family protein                                  |
| <i>Migut.D00455</i> | LG4 | 2149199 | <i>AT4G28590.1</i> | Symbols:                                     | FUNCTIONS IN: molecular_function unknown; INVOLVED                      |
| <i>Migut.D00456</i> | LG4 | 2151173 | <i>AT3G14940.1</i> | Symbols: ATPPC3, PPC3                        | phosphoenolpyruvate carboxylase 3                                       |
| <i>Migut.D00457</i> | LG4 | 2153870 | <i>AT4G00310.2</i> | Symbols: MEE46, EDA8                         | Putative membrane lipoprotein                                           |
| <i>Migut.D00458</i> | LG4 | 2157556 | <i>AT4G28600.1</i> | Symbols: NPGR2<br>Symbols: PSAT1,<br>ATPSAT1 | no pollen germination related 2<br>phospholipid sterol acyl transferase |
| <i>Migut.D00459</i> | LG4 | 2161576 | <i>AT1G04010.1</i> | Symbols:                                     | BEST Arabidopsis thaliana protein match is: exocyst                     |
| <i>Migut.D00460</i> | LG4 | 2168339 | <i>AT1G10180.1</i> | Symbols:                                     | plastid developmental protein DAG, putative                             |
| <i>Migut.D00461</i> | LG4 | 2171329 | <i>AT1G32580.1</i> | Symbols:                                     |                                                                         |
| <i>Migut.D00462</i> | LG4 | 2174781 | <i>AT1G04020.1</i> | Symbols: ATBARD1,<br>BARD1, ROW1             | breast cancer associated RING                                           |
| <i>Migut.D00463</i> | LG4 | 2179180 | <i>AT5G46050.1</i> | Symbols: ATPTR3, PTR3                        | peptide transporter 3                                                   |
| <i>Migut.D00464</i> | LG4 | 2182637 | <i>AT5G44030.1</i> | Symbols: CESA4, IRX5,<br>NWS2                | cellulose synthase A4                                                   |
| <i>Migut.D00465</i> | LG4 | 2184926 | <i>AT5G44030.1</i> | Symbols: CESA4, IRX5,<br>NWS2                | cellulose synthase A4                                                   |
| <i>Migut.D00466</i> | LG4 | 2192583 | <i>AT4G28610.1</i> | Symbols: PHR1, AtPHR1                        | phosphate starvation response 1                                         |
| <i>Migut.D00467</i> | LG4 | 2199116 | <i>AT3G46560.1</i> | Symbols: TIM9, emb2474                       | Tim10/DDP family zinc finger protein                                    |
| <i>Migut.D00468</i> | LG4 | 2200823 | <i>AT5G44010.1</i> | Symbols:                                     | unknown protein; Has 28 Blast hits to 26 proteins                       |
| <i>Migut.D00469</i> | LG4 | 2204161 | <i>AT3G04400.1</i> | Symbols: emb2171                             | Ribosomal protein L14p/L23e family protein                              |
| <i>Migut.D00470</i> | LG4 | 2206252 | <i>AT5G43990.4</i> | Symbols: SUVR2, SDG18                        | SET-domain containing protein lysine                                    |
| <i>Migut.D00471</i> | LG4 | 2213095 | <i>AT1G04520.1</i> | Symbols: PDLP2                               | plasmodesmata-located protein 2                                         |
| <i>Migut.D00472</i> | LG4 | 2217419 | <i>AT5G43970.1</i> | Symbols: TOM22-V,<br>TOM9-2, ATTOM22-V       | translocase of outer                                                    |
| <i>Migut.D00473</i> | LG4 | 2219853 | <i>AT1G04080.1</i> | Symbols: PRP39                               | Tetratricopeptide repeat (TPR)-like superfamily                         |
| <i>Migut.D00474</i> | LG4 | 2227989 | <i>AT5G43960.1</i> | Symbols:                                     | Nuclear transport factor 2 (NTF2) family protein                        |
| <i>Migut.D00475</i> | LG4 | 2232675 | <i>AT5G20190.1</i> | Symbols:                                     | Tetratricopeptide repeat (TPR)-like superfamily                         |
| <i>Migut.D00476</i> | LG4 | 2237097 | <i>AT1G04090.1</i> | Symbols:                                     | Plant protein of unknown function (DUF946)                              |
| <i>Migut.D00477</i> | LG4 | 2243106 | <i>AT2G33310.2</i> | Symbols: IAA13                               | auxin-induced protein 13                                                |
| <i>Migut.D00478</i> | LG4 | 2245257 | <i>AT4G28650.1</i> | Symbols:                                     | Leucine-rich repeat transmembrane protein kinase                        |
| <i>Migut.D00479</i> | LG4 | 2250508 | <i>AT4G28660.1</i> | Symbols: PSB28                               | photosystem II reaction center PSB28 protein                            |

|                     |     |         |                    |                                       |                                                                                                              |
|---------------------|-----|---------|--------------------|---------------------------------------|--------------------------------------------------------------------------------------------------------------|
| <i>Migut.D00480</i> | LG4 | 2251734 | <i>AT1G04110.1</i> | Symbols: SDD1                         | Subtilase family protein                                                                                     |
| <i>Migut.D00481</i> | LG4 | 2255686 | <i>AT2G20370.1</i> | Symbols: KAM1, MUR3                   | Exostosin family protein                                                                                     |
| <i>Migut.D00482</i> | LG4 | 2260136 | <i>AT2G20362.1</i> | Symbols:                              | unknown protein; FUNCTIONS IN: molecular_function                                                            |
| <i>Migut.D00483</i> | LG4 | 2260643 | <i>AT2G20360.1</i> | Symbols:                              | NAD(P)-binding Rossmann-fold superfamily protein                                                             |
| <i>Migut.D00484</i> | LG4 | 2265947 | <i>AT1G04120.1</i> | Symbols: ATMRP5, MRP5, ATABCC5, ABCC5 | multidrug resistance-associated                                                                              |
| <i>Migut.D00485</i> | LG4 | 2274271 | <i>AT2G20340.1</i> | Symbols:                              | Pyridoxal phosphate (PLP)-dependent transferases                                                             |
| <i>Migut.D00486</i> | LG4 | 2277491 | <i>AT2G20330.1</i> | Symbols:                              | Transducin/WD40 repeat-like superfamily protein                                                              |
| <i>Migut.D00487</i> | LG4 | 2281663 | <i>AT2G20320.1</i> | Symbols:                              | DENN (AEX-3) domain-containing protein                                                                       |
| <i>Migut.D00488</i> | LG4 | 2286505 | <i>AT4G28690.1</i> | Symbols:                              | BEST Arabidopsis thaliana protein match is: RPM1                                                             |
| <i>Migut.D00489</i> | LG4 | 2292255 | <i>AT3G04300.1</i> | Symbols:                              | RmlC-like cupins superfamily protein                                                                         |
| <i>Migut.D00490</i> | LG4 | 2294554 | <i>AT1G32370.3</i> | Symbols: TOM2B, TTM1                  | tobamovirus multiplication 2B                                                                                |
| <i>Migut.D00491</i> | LG4 | 2297452 | <i>AT2G20300.1</i> | Symbols: ALE2                         | Protein kinase superfamily protein                                                                           |
| <i>Migut.D00492</i> | LG4 | 2302655 | <i>AT4G28706.3</i> | Symbols:                              | pfkB-like carbohydrate kinase family protein                                                                 |
| <i>Migut.D00493</i> | LG4 | 2306054 | <i>AT1G04150.1</i> | Symbols:                              | C2 calcium/lipid-binding plant phosphoribosyltransferase                                                     |
| <i>Migut.D00494</i> | LG4 | 2318317 | <i>AT5G43900.3</i> | Symbols: MYA2                         | myosin 2                                                                                                     |
| <i>Migut.D00495</i> | LG4 | 2339982 | <i>AT4G28720.1</i> | Symbols: YUC8                         | Flavin-binding monooxygenase family protein                                                                  |
| <i>Migut.D00496</i> | LG4 | 2345055 | <i>AT2G20270.1</i> | Symbols:                              | Thioredoxin superfamily protein                                                                              |
| <i>Migut.D00497</i> | LG4 | 2347413 | <i>AT4G28740.1</i> | Symbols:                              | FUNCTIONS IN: molecular_function unknown; INVOLVED                                                           |
| <i>Migut.D00498</i> | LG4 | 2349470 | <i>AT2G20260.1</i> | Symbols: PSAE-2                       | photosystem I subunit E-2                                                                                    |
| <i>Migut.D00499</i> | LG4 | 2352670 | <i>AT4G28760.2</i> | Symbols:                              | Protein of unknown function (DUF3741)                                                                        |
| <i>Migut.D00500</i> | LG4 | 2357702 | <i>AT2G20230.1</i> | Symbols:                              | Tetraspanin family protein                                                                                   |
| <i>Migut.D00501</i> | LG4 | 2361929 | <i>AT4G28780.1</i> | Symbols:                              | GDSL-like Lipase/Acylhydrolase superfamily protein<br>CONTAINS InterPro DOMAIN/s: Ribosomal protein S27/S33, |
| <i>Migut.D00502</i> | LG4 | 2363696 | <i>AT5G44710.1</i> | Symbols:                              |                                                                                                              |
| <i>Migut.D00503</i> | LG4 | 2365909 | <i>AT3G23990.1</i> | Symbols: HSP60, HSP60-3B              | heat shock protein 60                                                                                        |
| <i>Migut.D00504</i> | LG4 | 2372744 | <i>AT2G20180.3</i> | Symbols: PIL5                         | phytochrome interacting factor 3-like 5                                                                      |
| <i>Migut.D00505</i> | LG4 | 2375647 | <i>AT4G28820.1</i> | Symbols:                              | HIT-type Zinc finger family protein                                                                          |
| <i>Migut.D00506</i> | LG4 | 2379184 | <i>AT4G29040.1</i> | Symbols: RPT2a                        | regulatory particle AAA-ATPase 2A                                                                            |
| <i>Migut.D00507</i> | LG4 | 2381856 | <i>AT5G36890.1</i> | Symbols: BGLU42                       | beta glucosidase 42                                                                                          |
| <i>Migut.D00508</i> | LG4 | 2386289 | <i>AT4G29030.1</i> | Symbols:                              | Putative membrane lipoprotein                                                                                |
| <i>Migut.D00509</i> | LG4 | 2391692 | <i>AT3G27831.1</i> | Symbols:                              | Gamma-thionin family protein                                                                                 |
| <i>Migut.D00510</i> | LG4 | 2393268 | <i>AT3G27831.1</i> | Symbols:                              | Gamma-thionin family protein                                                                                 |
| <i>Migut.D00511</i> | LG4 | 2401551 | <i>AT3G24650.1</i> | Symbols: ABI3, SIS10                  | AP2/B3-like transcriptional factor family                                                                    |
| <i>Migut.D00512</i> | LG4 | 2405848 | <i>AT5G48940.1</i> | Symbols:                              | Leucine-rich repeat transmembrane protein kinase                                                             |
| <i>Migut.D00513</i> | LG4 | 2422430 | <i>AT4G13220.1</i> | Symbols:                              | unknown protein; FUNCTIONS IN: molecular_function                                                            |
| <i>Migut.D00514</i> | LG4 | 2424416 | <i>AT2G31300.1</i> | Symbols: ARPC1B, ARPC1                | actin-related protein C1B                                                                                    |
| <i>Migut.D00515</i> | LG4 | 2430494 | <i>AT4G13710.1</i> | Symbols:                              | Pectin lyase-like superfamily protein                                                                        |
| <i>Migut.D00516</i> | LG4 | 2436382 | <i>AT5G57520.1</i> | Symbols: ZFP2, ATZFP2                 | zinc finger protein 2                                                                                        |
| <i>Migut.D00517</i> | LG4 | 2438293 | <i>AT3G07020.2</i> | Symbols:                              | UDP-Glycosyltransferase superfamily protein                                                                  |
| <i>Migut.D00518</i> | LG4 | 2443692 | <i>AT3G24730.1</i> | Symbols:                              | mRNA splicing factor, thioredoxin-like U5 snRNP                                                              |
| <i>Migut.D00519</i> | LG4 | 2446550 | <i>AT5G48870.1</i> | Symbols: SAD1                         | Small nuclear ribonucleoprotein family protein                                                               |
| <i>Migut.D00520</i> | LG4 | 2451246 | <i>AT3G24750.1</i> | Symbols:                              | unknown protein; Has 25 Blast hits to 25 proteins                                                            |
| <i>Migut.D00521</i> | LG4 | 2455245 | <i>AT3G07030.1</i> | Symbols:                              | Alba DNA/RNA-binding protein                                                                                 |
| <i>Migut.D00522</i> | LG4 | 2457717 | <i>AT5G48850.1</i> | Symbols: ATSDI1                       | Tetratricopeptide repeat (TPR)-like superfamily                                                              |
| <i>Migut.D00523</i> | LG4 | 2460873 | <i>AT5G48840.1</i> | Symbols: PANC, PTS,                   | homolog of bacterial PANC                                                                                    |

## ATPTS

|                     |     |         |                    |                                              |                                                      |
|---------------------|-----|---------|--------------------|----------------------------------------------|------------------------------------------------------|
| <i>Migut.D00524</i> | LG4 | 2462901 | <i>AT2G33120.1</i> | Symbols: SAR1,<br>VAMP722, ATVAMP722         | synaptobrevin-related protein                        |
| <i>Migut.D00525</i> | LG4 | 2466846 | <i>AT4G13200.1</i> | Symbols:                                     | unknown protein; FUNCTIONS IN: molecular_function    |
| <i>Migut.D00526</i> | LG4 | 2467675 | <i>AT3G07050.1</i> | Symbols:                                     | GTP-binding family protein                           |
| <i>Migut.D00527</i> | LG4 | 2482629 | <i>AT4G13195.1</i> | Symbols: CLE44                               | CLAVATA3/ESR-RELATED 44                              |
| <i>Migut.D00528</i> | LG4 | 2484792 | <i>AT3G07060.1</i> | Symbols: emb1974                             | NHL domain-containing protein                        |
| <i>Migut.D00529</i> | LG4 | 2491298 | <i>AT3G07070.1</i> | Symbols:                                     | Protein kinase superfamily protein                   |
| <i>Migut.D00530</i> | LG4 | 2493699 | <i>AT3G02885.1</i> | Symbols: GASAS5                              | GAST1 protein homolog 5                              |
| <i>Migut.D00531</i> | LG4 | 2495325 | <i>AT3G07080.1</i> | Symbols:                                     | EamA-like transporter family                         |
| <i>Migut.D00532</i> | LG4 | 2498461 | <i>AT3G07090.1</i> | Symbols:                                     | PPPDE putative thiol peptidase family protein        |
| <i>Migut.D00533</i> | LG4 | 2501486 | <i>AT2G32700.6</i> | Symbols: LUH                                 | LEUNIG_homolog                                       |
| <i>Migut.D00534</i> | LG4 | 2510275 | <i>AT3G24800.1</i> | Symbols: PRT1                                | proteolysis 1                                        |
| <i>Migut.D00535</i> | LG4 | 2517939 | <i>AT5G48820.1</i> | Symbols: KRP3, ICK6                          |                                                      |
| <i>Migut.D00536</i> | LG4 | 2524429 | <i>AT3G24820.1</i> | Symbols:                                     | BSD domain-containing protein                        |
| <i>Migut.D00537</i> | LG4 | 2527453 | <i>AT2G44150.1</i> | Symbols: ASHH3, SDG7                         | histone-lysine N-methyltransferase ASHH3             |
| <i>Migut.D00538</i> | LG4 | 2533245 | <i>AT1G51110.1</i> | Symbols:                                     | Plastid-lipid associated protein PAP / fibrillin     |
| <i>Migut.D00539</i> | LG4 | 2536550 | <i>AT3G02065.3</i> | Symbols:                                     | P-loop containing nucleoside triphosphate hydrolases |
| <i>Migut.D00540</i> | LG4 | 2539581 | <i>AT5G19900.1</i> | Symbols:                                     | PRLI-interacting factor, putative                    |
| <i>Migut.D00541</i> | LG4 | 2543711 | <i>AT5G13000.1</i> | Symbols: ATGSL12, gsl12                      | glucan synthase-like 12                              |
| <i>Migut.D00542</i> | LG4 | 2564254 | <i>AT1G71020.2</i> | Symbols:                                     | ARM repeat superfamily protein                       |
| <i>Migut.D00543</i> | LG4 | 2566787 | <i>AT3G12120.2</i> | Symbols: FAD2                                | fatty acid desaturase 2                              |
| <i>Migut.D00544</i> | LG4 | 2570905 | <i>AT2G18220.1</i> | Symbols:                                     | Noc2p family                                         |
| <i>Migut.D00545</i> | LG4 | 2576841 | <i>AT5G19640.1</i> | Symbols:                                     | Major facilitator superfamily protein                |
| <i>Migut.D00546</i> | LG4 | 2582796 | <i>AT2G05990.2</i> | Symbols: MOD1, ENR1                          | NAD(P)-binding Rossmann-fold superfamily             |
| <i>Migut.D00547</i> | LG4 | 2587332 |                    |                                              |                                                      |
| <i>Migut.D00548</i> | LG4 | 2589432 | <i>AT5G60900.1</i> | Symbols: RLK1                                | receptor-like protein kinase 1                       |
| <i>Migut.D00549</i> | LG4 | 2592496 | <i>AT3G49142.1</i> | Symbols:                                     | Tetratricopeptide repeat (TPR)-like superfamily      |
| <i>Migut.D00550</i> | LG4 | 2594721 | <i>AT3G57930.2</i> | Symbols:                                     | unknown protein; BEST Arabidopsis thaliana protein   |
| <i>Migut.D00551</i> | LG4 | 2597153 | <i>AT5G44640.1</i> | Symbols: BGLU13                              | beta glucosidase 13                                  |
| <i>Migut.D00552</i> | LG4 | 2600475 | <i>AT3G45140.1</i> | Symbols: LOX2, ATLOX2                        | lipoyxygenase 2                                      |
| <i>Migut.D00553</i> | LG4 | 2609156 | <i>AT3G45140.1</i> | Symbols: LOX2, ATLOX2                        | lipoyxygenase 2                                      |
| <i>Migut.D00554</i> | LG4 | 2614890 | <i>AT3G45140.1</i> | Symbols: LOX2, ATLOX2                        | lipoyxygenase 2                                      |
| <i>Migut.D00555</i> | LG4 | 2620250 | <i>AT3G45140.1</i> | Symbols: LOX2, ATLOX2                        | lipoyxygenase 2                                      |
| <i>Migut.D00556</i> | LG4 | 2625306 | <i>AT3G45140.1</i> | Symbols: LOX2, ATLOX2                        | lipoyxygenase 2                                      |
| <i>Migut.D00557</i> | LG4 | 2631387 | <i>AT3G45140.1</i> | Symbols: LOX2, ATLOX2                        | lipoyxygenase 2                                      |
| <i>Migut.D00558</i> | LG4 | 2637826 | <i>AT3G20780.1</i> | Symbols: ATTOP6B, BIN3,<br>HYP6, RHL3, TOP6B | topoisomerase 6                                      |
| <i>Migut.D00559</i> | LG4 | 2643351 | <i>AT3G20790.1</i> | Symbols:                                     | NAD(P)-binding Rossmann-fold superfamily protein     |
| <i>Migut.D00560</i> | LG4 | 2646532 | <i>AT3G57880.1</i> | Symbols:                                     | Calcium-dependent lipid-binding (CaLB domain) plant  |
| <i>Migut.D00561</i> | LG4 | 2652184 | <i>AT4G05160.1</i> | Symbols:                                     | AMP-dependent synthetase and ligase family protein   |
| <i>Migut.D00562</i> | LG4 | 2656992 | <i>AT3G20810.1</i> | Symbols: JMJD5                               | 2-oxoglutarate (2OG) and Fe(II)-dependent            |
| <i>Migut.D00563</i> | LG4 | 2662574 | <i>AT5G12900.1</i> | Symbols:                                     | unknown protein; FUNCTIONS IN: molecular_function    |
| <i>Migut.D00564</i> | LG4 | 2668387 | <i>AT1G31320.1</i> | Symbols: LBD4                                | LOB domain-containing protein 4                      |
| <i>Migut.D00565</i> | LG4 | 2669206 | <i>AT5G65360.1</i> | Symbols:                                     | Histone superfamily protein                          |
| <i>Migut.D00566</i> | LG4 | 2670835 | <i>AT4G12070.1</i> | Symbols:                                     | unknown protein; INVOLVED IN: biological_process     |

|                     |     |         |                    |                                        |                                                       |
|---------------------|-----|---------|--------------------|----------------------------------------|-------------------------------------------------------|
| <i>Migut.D00567</i> | LG4 | 2675429 | <i>AT5G12930.1</i> | Symbols:                               | unknown protein; Has 1807 Blast hits to 1807 proteins |
| <i>Migut.D00568</i> | LG4 | 2679132 | <i>AT2G42280.1</i> | Symbols:                               | basic helix-loop-helix (bHLH) DNA-binding superfamily |
| <i>Migut.D00569</i> | LG4 | 2688959 | <i>AT3G20820.1</i> | Symbols:                               | Leucine-rich repeat (LRR) family protein              |
| <i>Migut.D00570</i> | LG4 | 2691454 | <i>AT5G12950.1</i> | Symbols:                               | Putative glycosyl hydrolase of unknown function       |
| <i>Migut.D00571</i> | LG4 | 2696175 | <i>AT5G12950.1</i> | Symbols:                               | Putative glycosyl hydrolase of unknown function       |
| <i>Migut.D00572</i> | LG4 | 2701950 | <i>AT3G13440.1</i> | Symbols:                               | S-adenosyl-L-methionine-dependent methyltransferases  |
| <i>Migut.D00573</i> | LG4 | 2707186 | <i>AT3G20830.1</i> | Symbols:                               | AGC (cAMP-dependent, cGMP-dependent and protein       |
| <i>Migut.D00574</i> | LG4 | 2718331 | <i>AT3G12630.1</i> | Symbols:                               | A20/AN1-like zinc finger family protein               |
| <i>Migut.D00575</i> | LG4 | 2722146 | <i>AT1G51190.1</i> | Symbols: PLT2                          | Integrase-type DNA-binding superfamily protein        |
| <i>Migut.D00576</i> | LG4 | 2731265 | <i>AT5G13070.1</i> | Symbols:                               | MSF1-like family protein                              |
| <i>Migut.D00577</i> | LG4 | 2733246 | <i>AT4G29860.1</i> | Symbols: EMB2757, TAN                  | Transducin/WD40 repeat-like superfamily               |
| <i>Migut.D00578</i> | LG4 | 2735008 | <i>AT1G51200.4</i> | Symbols:                               | A20/AN1-like zinc finger family protein               |
| <i>Migut.D00579</i> | LG4 | 2738301 | <i>AT3G20860.1</i> | Symbols: ATNEK5, NEK5                  | NIMA-related kinase 5                                 |
| <i>Migut.D00580</i> | LG4 | 2744421 | <i>AT2G28290.1</i> | Symbols: SYD, CHR3                     | P-loop containing nucleoside triphosphate             |
| <i>Migut.D00581</i> | LG4 | 2767745 | <i>AT1G19670.1</i> | Symbols: ATCLH1, COR11, ATHCOR1, CLH1  | chlorophyllase 1                                      |
| <i>Migut.D00582</i> | LG4 | 2769778 | <i>AT3G20870.1</i> | Symbols: ZTP29                         | ZIP metal ion transporter family                      |
| <i>Migut.D00583</i> | LG4 | 2776495 | <i>AT3G57670.1</i> | Symbols: NTT, WIP2                     | C2H2-type zinc finger family protein                  |
| <i>Migut.D00584</i> | LG4 | 2784853 | <i>AT5G19620.1</i> | Symbols: EMB213, OEP80, ATOEP80, TOC75 | outer envelope protein                                |
| <i>Migut.D00585</i> | LG4 | 2790865 | <i>AT1G63440.1</i> | Symbols: HMA5                          | heavy metal atpase 5                                  |
| <i>Migut.D00586</i> | LG4 | 2797838 | <i>AT5G13490.2</i> | Symbols: AAC2                          | ADP/ATP carrier 2                                     |
| <i>Migut.D00587</i> | LG4 | 2802618 | <i>AT1G67680.1</i> | Symbols:                               | SRP72 RNA-binding domain                              |
| <i>Migut.D00588</i> | LG4 | 2812865 | <i>AT3G63530.2</i> | Symbols: BB, BB2                       | RING/U-box superfamily protein                        |
| <i>Migut.D00589</i> | LG4 | 2815840 | <i>AT1G21310.1</i> | Symbols: ATEXT3, RSH, EXT3             | extensin 3                                            |
| <i>Migut.D00590</i> | LG4 | 2864109 | <i>AT4G34890.1</i> | Symbols: ATXDH1, XDH1                  | xanthine dehydrogenase 1                              |
| <i>Migut.D00591</i> | LG4 | 2871956 |                    |                                        |                                                       |
| <i>Migut.D00592</i> | LG4 | 2886321 |                    |                                        |                                                       |
| <i>Migut.D00593</i> | LG4 | 2887071 | <i>AT4G34890.1</i> | Symbols: ATXDH1, XDH1                  | xanthine dehydrogenase 1                              |
| <i>Migut.D00594</i> | LG4 | 2894476 | <i>AT3G57650.1</i> | Symbols: LPAT2                         | lysophosphatidyl acyltransferase 2                    |
| <i>Migut.D00595</i> | LG4 | 2899192 | <i>AT5G19350.2</i> | Symbols:                               | RNA-binding (RRM/RBD/RNP motifs) family protein       |
| <i>Migut.D00596</i> | LG4 | 2903092 | <i>AT4G14700.1</i> | Symbols: ATORC1A, ORC1A                | origin recognition complex 1                          |
| <i>Migut.D00597</i> | LG4 | 2908552 | <i>AT4G36250.1</i> | Symbols: ALDH3F1                       | aldehyde dehydrogenase 3F1                            |
| <i>Migut.D00598</i> | LG4 | 2914282 | <i>AT5G23960.2</i> | Symbols: TPS21                         | terpene synthase 21                                   |
| <i>Migut.D00599</i> | LG4 | 2918104 | <i>AT5G12860.1</i> | Symbols: DiT1                          | dicarboxylate transporter 1                           |
| <i>Migut.D00600</i> | LG4 | 2921608 | <i>AT1G51340.2</i> | Symbols:                               | MATE efflux family protein                            |
| <i>Migut.D00601</i> | LG4 | 2925671 | <i>AT1G51350.1</i> | Symbols:                               | ARM repeat superfamily protein                        |
| <i>Migut.D00602</i> | LG4 | 2930569 | <i>AT5G19855.1</i> | Symbols:                               | Chaperonin-like RbcX protein                          |
| <i>Migut.D00603</i> | LG4 | 2933512 | <i>AT3G20898.1</i> | Symbols:                               | unknown protein; FUNCTIONS IN: molecular_function     |
| <i>Migut.D00604</i> | LG4 | 2941174 | <i>AT5G12840.4</i> | Symbols: HAP2A, ATHAP2A, NF-YA1        | nuclear factor Y, subunit                             |
| <i>Migut.D00605</i> | LG4 | 2942930 | <i>AT3G20920.1</i> | Symbols:                               | translocation protein-related                         |
| <i>Migut.D00606</i> | LG4 | 2946487 | <i>AT5G12480.1</i> | Symbols: CPK7                          | calmodulin-domain protein kinase 7                    |
| <i>Migut.D00607</i> | LG4 | 2950842 | <i>AT1G65720.1</i> | Symbols:                               | unknown protein; FUNCTIONS IN: molecular_function     |
| <i>Migut.D00608</i> | LG4 | 2953637 | <i>AT5G04590.1</i> | Symbols: SIR                           | sulfite reductase                                     |

|                     |     |         |                    |                                      |                                                    |
|---------------------|-----|---------|--------------------|--------------------------------------|----------------------------------------------------|
| <i>Migut.D00609</i> | LG4 | 2957992 | <i>AT3G21055.1</i> | Symbols: PSBTN                       | photosystem II subunit T                           |
| <i>Migut.D00610</i> | LG4 | 2962167 | <i>AT1G51405.1</i> | Symbols:<br>Symbols: WNK8,<br>ATWNK8 | myosin-related<br>with no lysine (K) kinase 8      |
| <i>Migut.D00611</i> | LG4 | 2965102 | <i>AT5G41990.1</i> | Symbols:                             | NAD(P)-binding Rossmann-fold superfamily protein   |
| <i>Migut.D00612</i> | LG4 | 2966861 | <i>AT5G19440.1</i> | Symbols:                             | F-box family protein                               |
| <i>Migut.D00613</i> | LG4 | 2976714 | <i>AT3G06240.1</i> | Symbols:                             | F-box family protein                               |
| <i>Migut.D00614</i> | LG4 | 2978640 | <i>AT5G44220.1</i> | Symbols:                             | alpha/beta-Hydrolases superfamily protein          |
| <i>Migut.D00615</i> | LG4 | 2983323 | <i>AT1G51440.1</i> | Symbols:                             | Protein of unknown function (DUF3411)              |
| <i>Migut.D00616</i> | LG4 | 2988758 | <i>AT5G12470.1</i> | Symbols:                             | Protein of unknown function (DUF604)               |
| <i>Migut.D00617</i> | LG4 | 2991945 | <i>AT5G12460.1</i> | Symbols:                             | Protein of unknown function (DUF604)               |
| <i>Migut.D00618</i> | LG4 | 2995318 | <i>AT5G12460.1</i> | Symbols:                             | Protein of unknown function (DUF604)               |
| <i>Migut.D00619</i> | LG4 | 3001647 | <i>AT5G12460.1</i> | Symbols:                             | Protein of unknown function (DUF604)               |
| <i>Migut.D00620</i> | LG4 | 3006018 | <i>AT5G12460.1</i> | Symbols:                             | Protein of unknown function (DUF604)               |
| <i>Migut.D00621</i> | LG4 | 3011387 | <i>AT3G21070.2</i> | Symbols: NADK1                       | NAD kinase 1                                       |
| <i>Migut.D00622</i> | LG4 | 3019027 | <i>AT1G51450.1</i> | Symbols: TRO                         | TRAUCO                                             |
| <i>Migut.D00623</i> | LG4 | 3022054 | <i>AT3G21090.1</i> | Symbols:                             | ABC-2 type transporter family protein              |
| <i>Migut.D00624</i> | LG4 | 3029030 | <i>AT3G21090.1</i> | Symbols:                             | ABC-2 type transporter family protein              |
| <i>Migut.D00625</i> | LG4 | 3032527 | <i>AT3G62470.1</i> | Symbols:                             | Pentatricopeptide repeat (PPR) superfamily protein |
| <i>Migut.D00626</i> | LG4 | 3037791 | <i>AT2G47430.1</i> | Symbols: CK11                        | Signal transduction histidine kinase               |
| <i>Migut.D00627</i> | LG4 | 3041212 | <i>AT4G02060.2</i> | Symbols: PRL                         | Minichromosome maintenance (MCM2/3/5) family       |
| <i>Migut.D00628</i> | LG4 | 3046338 | <i>AT1G51510.1</i> | Symbols: Y14                         | RNA-binding (RRM/RBD/RNP motifs) family protein    |
| <i>Migut.D00629</i> | LG4 | 3064204 | <i>AT3G21100.2</i> | Symbols:                             | RNA-binding (RRM/RBD/RNP motifs) family protein    |
| <i>Migut.D00630</i> | LG4 | 3071166 | <i>AT3G21100.2</i> | Symbols:                             | RNA-binding (RRM/RBD/RNP motifs) family protein    |
| <i>Migut.D00631</i> | LG4 | 3075483 | <i>AT2G47000.1</i> | Symbols: MDR4, PGP4,<br>ABC4, ATPGP4 | ATP binding cassette subfamily                     |
| <i>Migut.D00632</i> | LG4 | 3078479 | <i>AT2G47000.1</i> | Symbols: MDR4, PGP4,<br>ABC4, ATPGP4 | ATP binding cassette subfamily                     |
| <i>Migut.D00633</i> | LG4 | 3082447 | <i>AT1G50450.1</i> | Symbols:                             | Saccharopine dehydrogenase                         |
| <i>Migut.D00634</i> | LG4 | 3085940 | <i>AT5G41560.1</i> | Symbols:                             | FUNCTIONS IN: molecular_function unknown; INVOLVED |
| <i>Migut.D00635</i> | LG4 | 3095307 | <i>AT1G50460.1</i> | Symbols: HKL1, ATHKL1                | hexokinase-like 1                                  |
| <i>Migut.D00636</i> | LG4 | 3100828 | <i>AT1G70170.1</i> | Symbols: MMP                         | matrix metalloproteinase                           |
| <i>Migut.D00637</i> | LG4 | 3102357 | <i>AT1G59970.1</i> | Symbols:                             | Matrixin family protein                            |
| <i>Migut.D00638</i> | LG4 | 3114361 | <i>AT1G59970.1</i> | Symbols:                             | Matrixin family protein                            |
| <i>Migut.D00639</i> | LG4 | 3123067 | <i>AT4G16640.1</i> | Symbols:                             | Matrixin family protein                            |
| <i>Migut.D00640</i> | LG4 | 3125151 | <i>AT3G20060.1</i> | Symbols: UBC19                       | ubiquitin-conjugating enzyme19                     |
| <i>Migut.D00641</i> | LG4 | 3129814 | <i>AT1G73830.1</i> | Symbols: BEE3                        | BR enhanced expression 3                           |
| <i>Migut.D00642</i> | LG4 | 3132337 | <i>AT5G12400.1</i> | Symbols:                             | DNA binding;zinc ion binding;DNA binding           |
| <i>Migut.D00643</i> | LG4 | 3145552 | <i>AT1G50420.1</i> | Symbols: SCL3, SCL-3                 | scarecrow-like 3                                   |
| <i>Migut.D00644</i> | LG4 | 3148730 | <i>AT1G50510.1</i> | Symbols:                             | indigoidine synthase A family protein              |
| <i>Migut.D00645</i> | LG4 | 3153158 | <i>AT4G31530.1</i> | Symbols:                             | NAD(P)-binding Rossmann-fold superfamily protein   |
| <i>Migut.D00646</i> | LG4 | 3156906 | <i>AT1G50450.1</i> | Symbols:                             | Saccharopine dehydrogenase                         |
| <i>Migut.D00647</i> | LG4 | 3164301 | <i>AT5G46170.1</i> | Symbols:                             | F-box family protein                               |
| <i>Migut.D00648</i> | LG4 | 3166142 | <i>AT1G34470.1</i> | Symbols:                             | Protein of unknown function (DUF803)               |
| <i>Migut.D00649</i> | LG4 | 3169956 | <i>AT3G57090.1</i> | Symbols: BIGYIN, FIS1A               | Tetratricopeptide repeat (TPR)-like                |
| <i>Migut.D00650</i> | LG4 | 3172492 | <i>AT3G07910.1</i> | Symbols:                             | FUNCTIONS IN: molecular_function unknown; INVOLVED |
| <i>Migut.D00651</i> | LG4 | 3174815 | <i>AT3G14190.1</i> | Symbols:                             | unknown protein; BEST Arabidopsis thaliana protein |



|                     |     |         |                    |                                    |                                                       |
|---------------------|-----|---------|--------------------|------------------------------------|-------------------------------------------------------|
| <i>Migut.D00652</i> | LG4 | 3179055 | <i>AT4G38180.1</i> | Symbols: FR55                      | FAR1-related sequence 5                               |
| <i>Migut.D00653</i> | LG4 | 3188171 | <i>AT4G03250.1</i> | Symbols:                           | Homeodomain-like superfamily protein                  |
| <i>Migut.D00654</i> | LG4 | 3192124 | <i>AT2G03120.1</i> | Symbols: ATSP, SPP                 | signal peptide peptidase                              |
| <i>Migut.D00655</i> | LG4 | 3198397 | <i>AT5G12340.1</i> | Symbols:                           | unknown protein; BEST Arabidopsis thaliana protein    |
| <i>Migut.D00656</i> | LG4 | 3206340 | <i>AT5G12330.1</i> | Symbols: LRP1                      | Lateral root primordium (LRP) protein-related         |
| <i>Migut.D00657</i> | LG4 | 3210831 | <i>AT5G12310.1</i> | Symbols:                           | RING/U-box superfamily protein                        |
| <i>Migut.D00658</i> | LG4 | 3213628 | <i>AT5G12300.1</i> | Symbols:                           | Calcium-dependent lipid-binding (CaLB domain) family  |
| <i>Migut.D00659</i> | LG4 | 3215952 | <i>AT5G13500.3</i> | Symbols:                           | unknown protein; FUNCTIONS IN: molecular_function     |
| <i>Migut.D00660</i> | LG4 | 3218642 | <i>AT2G26870.1</i> | Symbols: NPC2                      | non-specific phospholipase C2                         |
| <i>Migut.D00661</i> | LG4 | 3230311 | <i>AT4G30880.1</i> | Symbols:                           | Bifunctional inhibitor/lipid-transfer protein/seed    |
| <i>Migut.D00662</i> | LG4 | 3231041 | <i>AT2G26870.1</i> | Symbols: NPC2                      | non-specific phospholipase C2                         |
| <i>Migut.D00663</i> | LG4 | 3235423 | <i>AT4G30880.1</i> | Symbols:                           | Bifunctional inhibitor/lipid-transfer protein/seed    |
| <i>Migut.D00664</i> | LG4 | 3236268 | <i>AT4G28010.1</i> | Symbols:                           | Tetratricopeptide repeat (TPR)-like superfamily       |
| <i>Migut.D00665</i> | LG4 | 3241473 | <i>AT5G19390.2</i> | Symbols:                           | Rho GTPase activation protein (RhoGAP) with PH        |
| <i>Migut.D00666</i> | LG4 | 3250425 | <i>AT4G29070.2</i> | Symbols:                           | Phospholipase A2 family protein                       |
| <i>Migut.D00667</i> | LG4 | 3253370 | <i>AT5G12170.2</i> | Symbols: CLT3                      | CRT (chloroquine-resistance transporter)-like         |
| <i>Migut.D00668</i> | LG4 | 3257695 | <i>AT1G70250.1</i> | Symbols:                           | receptor serine/threonine kinase, putative            |
| <i>Migut.D00669</i> | LG4 | 3261890 | <i>AT5G19370.1</i> | Symbols:                           | rhodanese-like domain-containing protein / PPIC-type  |
| <i>Migut.D00670</i> | LG4 | 3265220 | <i>AT5G12180.1</i> | Symbols: CPK17                     | calcium-dependent protein kinase 17                   |
| <i>Migut.D00671</i> | LG4 | 3269052 | <i>AT1G13570.1</i> | Symbols:                           | F-box/RNI-like superfamily protein                    |
| <i>Migut.D00672</i> | LG4 | 3273009 | <i>AT1G13570.1</i> | Symbols:                           | F-box/RNI-like superfamily protein                    |
| <i>Migut.D00673</i> | LG4 | 3276466 | <i>AT5G12200.1</i> | Symbols: PYD2                      | pyrimidine 2                                          |
| <i>Migut.D00674</i> | LG4 | 3283406 | <i>AT2G32560.1</i> | Symbols:                           | F-box family protein                                  |
| <i>Migut.D00675</i> | LG4 | 3286716 | <i>AT2G26530.1</i> | Symbols: AR781                     | Protein of unknown function (DUF1645)                 |
| <i>Migut.D00676</i> | LG4 | 3288784 | <i>AT2G26840.1</i> | Symbols:                           | unknown protein; FUNCTIONS IN: molecular_function     |
| <i>Migut.D00677</i> | LG4 | 3292925 | <i>AT2G13650.3</i> | Symbols: GONST1                    | golgi nucleotide sugar transporter 1                  |
| <i>Migut.D00678</i> | LG4 | 3296943 | <i>AT2G26800.1</i> | Symbols:                           | Aldolase superfamily protein                          |
| <i>Migut.D00679</i> | LG4 | 3300744 | <i>AT5G12240.2</i> | Symbols:                           | unknown protein; FUNCTIONS IN: molecular_function     |
| <i>Migut.D00680</i> | LG4 | 3303536 | <i>AT4G10320.1</i> | Symbols:                           | tRNA synthetase class I (I, L, M and V) family        |
| <i>Migut.D00681</i> | LG4 | 3308424 | <i>AT2G26780.1</i> | Symbols:                           | ARM repeat superfamily protein                        |
| <i>Migut.D00682</i> | LG4 | 3323229 | <i>AT1G08500.1</i> | Symbols: ENODL18,<br>AtENODL18     | early nodulin-like protein 18                         |
| <i>Migut.D00683</i> | LG4 | 3326001 | <i>AT1G69850.1</i> | Symbols: ATNRT1:2,<br>NTL1, NRT1:2 | nitrate transporter 1:2                               |
| <i>Migut.D00684</i> | LG4 | 3330216 | <i>AT2G26770.2</i> | Symbols:                           | pectin-related                                        |
| <i>Migut.D00685</i> | LG4 | 3334022 | <i>AT2G02800.2</i> | Symbols: APK2B                     | protein kinase 2B                                     |
| <i>Migut.D00686</i> | LG4 | 3336076 | <i>AT2G26980.3</i> | Symbols: CIPK3                     | CBL-interacting protein kinase 3                      |
| <i>Migut.D00687</i> | LG4 | 3348862 | <i>AT5G21105.1</i> | Symbols:                           | Plant L-ascorbate oxidase                             |
| <i>Migut.D00688</i> | LG4 | 3353308 |                    |                                    |                                                       |
| <i>Migut.D00689</i> | LG4 | 3355206 | <i>AT5G51140.1</i> | Symbols:                           | Pseudouridine synthase family protein                 |
| <i>Migut.D00690</i> | LG4 | 3356238 | <i>AT2G06025.1</i> | Symbols:                           | Acyl-CoA N-acyltransferases (NAT) superfamily protein |
| <i>Migut.D00691</i> | LG4 | 3369134 | <i>AT5G56200.1</i> | Symbols:                           | C2H2 type zinc finger transcription factor family     |
| <i>Migut.D00692</i> | LG4 | 3386016 | <i>AT5G21170.1</i> | Symbols: AKINBETA1                 | 5'-AMP-activated protein kinase beta-2                |
| <i>Migut.D00693</i> | LG4 | 3391243 | <i>AT3G43810.1</i> | Symbols: CAM7                      | calmodulin 7                                          |
| <i>Migut.D00694</i> | LG4 | 3396305 | <i>AT2G27040.2</i> | Symbols: AGO4                      | Argonaute family protein                              |
| <i>Migut.D00695</i> | LG4 | 3403343 | <i>AT3G48480.1</i> | Symbols:                           | Cysteine proteinases superfamily protein              |

|                     |     |         |                    |                                                  |                                                       |
|---------------------|-----|---------|--------------------|--------------------------------------------------|-------------------------------------------------------|
| <i>Migut.D00696</i> | LG4 | 3406258 | <i>AT4G35870.1</i> | Symbols:                                         | early-responsive to dehydration stress protein        |
| <i>Migut.D00697</i> | LG4 | 3410076 | <i>AT3G48480.1</i> | Symbols:                                         | Cysteine proteinases superfamily protein              |
| <i>Migut.D00698</i> | LG4 | 3413155 | <i>AT5G21160.1</i> | Symbols:                                         | LA RNA-binding protein                                |
| <i>Migut.D00699</i> | LG4 | 3421194 | <i>AT2G41060.2</i> | Symbols:                                         | RNA-binding (RRM/RBD/RNP motifs) family protein       |
| <i>Migut.D00700</i> | LG4 | 3421792 | <i>AT2G23680.1</i> | Symbols:                                         | Cold acclimation protein WCOR413 family               |
| <i>Migut.D00701</i> | LG4 | 3424662 | <i>AT5G16790.1</i> | Symbols: THO7, AtTHO7                            | Tho complex subunit 7/Mft1p                           |
| <i>Migut.D00702</i> | LG4 | 3427943 | <i>AT5G19500.1</i> | Symbols:                                         | Tryptophan/tyrosine permease                          |
| <i>Migut.D00703</i> | LG4 | 3432763 | <i>AT2G26930.1</i> | Symbols: ATCDPMEK, PDE277, ISPE, CDPMEK          | 4-(cytidine 5'-phospho)-2-C-methyl-D-erythritol       |
| <i>Migut.D00704</i> | LG4 | 3435638 | <i>AT2G26920.1</i> | Symbols:                                         | Ubiquitin-associated/translation elongation factor    |
| <i>Migut.D00705</i> | LG4 | 3441680 | <i>AT5G19490.1</i> | Symbols:                                         | Histone superfamily protein                           |
| <i>Migut.D00706</i> | LG4 | 3444229 | <i>AT2G40880.1</i> | Symbols: FL3-27, ATCYSA, CYSA                    | cystatin A                                            |
| <i>Migut.D00707</i> | LG4 | 3446034 | <i>AT5G19485.1</i> | Symbols:                                         | transferases;nucleotidyltransferases                  |
| <i>Migut.D00708</i> | LG4 | 3457913 | <i>AT5G26960.1</i> | Symbols:                                         | Galactose oxidase/kelch repeat superfamily protein    |
| <i>Migut.D00709</i> | LG4 | 3461770 | <i>AT3G03740.1</i> | Symbols: ATBPM4, BPM4                            | BTB-POZ and MATH domain 4                             |
| <i>Migut.D00710</i> | LG4 | 3465885 | <i>AT5G06100.1</i> | Symbols: MYB33, ATMYB33                          | myb domain protein 33                                 |
| <i>Migut.D00711</i> | LG4 | 3471033 | <i>AT5G21040.2</i> | Symbols: FBX2                                    | F-box protein 2                                       |
| <i>Migut.D00712</i> | LG4 | 3476393 | <i>AT3G43720.1</i> | Symbols:                                         | Bifunctional inhibitor/lipid-transfer protein/seed    |
| <i>Migut.D00713</i> | LG4 | 3480796 | <i>AT2G24190.1</i> | Symbols:                                         | NAD(P)-binding Rossmann-fold superfamily protein      |
| <i>Migut.D00714</i> | LG4 | 3483695 | <i>AT2G27100.1</i> | Symbols: SE                                      | C2H2 zinc-finger protein SERRATE (SE)                 |
| <i>Migut.D00715</i> | LG4 | 3489561 | <i>AT2G03200.1</i> | Symbols:                                         | Eukaryotic aspartyl protease family protein           |
| <i>Migut.D00716</i> | LG4 | 3494560 | <i>AT2G27090.1</i> | Symbols:                                         | Protein of unknown function (DUF630 and DUF632)       |
| <i>Migut.D00717</i> | LG4 | 3499925 | <i>AT2G27080.2</i> | Symbols:                                         | Late embryogenesis abundant (LEA) hydroxyproline-rich |
| <i>Migut.D00718</i> | LG4 | 3502289 | <i>AT2G27060.1</i> | Symbols:                                         | Leucine-rich repeat protein kinase family protein     |
| <i>Migut.D00719</i> | LG4 | 3510701 | <i>AT3G20770.1</i> | Symbols: EIN3, AtEIN3                            | Ethylene insensitive 3 family protein                 |
| <i>Migut.D00720</i> | LG4 | 3516530 | <i>AT2G27140.1</i> | Symbols:                                         | HSP20-like chaperones superfamily protein             |
| <i>Migut.D00721</i> | LG4 | 3518389 | <i>AT3G43610.1</i> | Symbols:                                         | Spc97 / Spc98 family of spindle pole body (SBP)       |
| <i>Migut.D00722</i> | LG4 | 3529544 | <i>AT2G27150.2</i> | Symbols: AAO3, At-AO3, AODelta, AtAAO3           | abscisic aldehyde                                     |
| <i>Migut.D00723</i> | LG4 | 3535430 | <i>AT5G20960.2</i> | Symbols: AAO1, AO1, ATAO, AT-AO1, AOalpha, AtAO1 | aldehyde                                              |
| <i>Migut.D00724</i> | LG4 | 3541038 | <i>AT3G07425.1</i> | Symbols:                                         | unknown protein; Has 35333 Blast hits to 34131        |
| <i>Migut.D00725</i> | LG4 | 3542239 | <i>AT3G07430.1</i> | Symbols: emb1990, YLMG1-1, ATYLMG1-1             | YGGT family protein                                   |
| <i>Migut.D00726</i> | LG4 | 3544095 | <i>AT3G07440.1</i> | Symbols:                                         | unknown protein; BEST Arabidopsis thaliana protein    |
| <i>Migut.D00727</i> | LG4 | 3546889 | <i>AT5G48520.1</i> | Symbols:                                         | unknown protein; Has 609 Blast hits to 593 proteins   |
| <i>Migut.D00728</i> | LG4 | 3554084 | <i>AT2G29640.1</i> | Symbols: JOSL                                    | JOSEPHIN-like protein                                 |
| <i>Migut.D00729</i> | LG4 | 3556385 | <i>AT5G48500.1</i> | Symbols:                                         | unknown protein; BEST Arabidopsis thaliana protein    |
| <i>Migut.D00730</i> | LG4 | 3563589 | <i>AT1G54217.2</i> | Symbols:                                         | Ribosomal protein L18ae family                        |
| <i>Migut.D00731</i> | LG4 | 3564487 | <i>AT5G48485.1</i> | Symbols: DIR1                                    | Bifunctional inhibitor/lipid-transfer protein/seed    |
| <i>Migut.D00732</i> | LG4 | 3566559 | <i>AT5G48480.1</i> | Symbols:                                         | Lactoylglutathione lyase / glyoxalase I family        |
| <i>Migut.D00733</i> | LG4 | 3571017 | <i>AT5G48470.1</i> | Symbols:                                         | unknown protein; FUNCTIONS IN: molecular_function     |
| <i>Migut.D00734</i> | LG4 | 3573115 | <i>AT5G48485.1</i> | Symbols: DIR1                                    | Bifunctional inhibitor/lipid-transfer protein/seed    |
| <i>Migut.D00735</i> | LG4 | 3574941 | <i>AT5G48480.1</i> | Symbols:                                         | Lactoylglutathione lyase / glyoxalase I family        |
| <i>Migut.D00736</i> | LG4 | 3576731 | <i>AT5G48470.1</i> | Symbols:                                         | unknown protein; FUNCTIONS IN: molecular_function     |

|                     |     |         |                    |                                     |                                                                                  |
|---------------------|-----|---------|--------------------|-------------------------------------|----------------------------------------------------------------------------------|
| <i>Migut.D00737</i> | LG4 | 3582150 | <i>AT5G48460.1</i> | Symbols:                            | Actin binding Calponin homology (CH) domain-containing                           |
| <i>Migut.D00738</i> | LG4 | 3592111 | <i>AT2G43060.1</i> | Symbols: IBH1                       | IL1 binding bHLH 1                                                               |
| <i>Migut.D00739</i> | LG4 | 3596360 |                    |                                     |                                                                                  |
| <i>Migut.D00740</i> | LG4 | 3596975 | <i>AT3G07470.1</i> | Symbols:                            | Protein of unknown function, DUF538                                              |
| <i>Migut.D00741</i> | LG4 | 3604705 | <i>AT4G03500.1</i> | Symbols:                            | Ankyrin repeat family protein                                                    |
| <i>Migut.D00742</i> | LG4 | 3608404 | <i>AT5G48450.1</i> | Symbols: sks3                       | SKU5 similar 3                                                                   |
| <i>Migut.D00743</i> | LG4 | 3612581 | <i>AT1G10610.1</i> | Symbols:                            | basic helix-loop-helix (bHLH) DNA-binding superfamily                            |
| <i>Migut.D00744</i> | LG4 | 3617312 | <i>AT5G48440.1</i> | Symbols:                            | FAD-dependent oxidoreductase family protein                                      |
| <i>Migut.D00745</i> | LG4 | 3620650 | <i>AT1G05990.1</i> | Symbols: RHS1                       | EF hand calcium-binding protein family                                           |
| <i>Migut.D00746</i> | LG4 | 3622318 | <i>AT3G07510.2</i> | Symbols:                            | unknown protein; FUNCTIONS IN: molecular_function                                |
| <i>Migut.D00747</i> | LG4 | 3627970 | <i>AT3G07510.2</i> | Symbols:                            | unknown protein; FUNCTIONS IN: molecular_function                                |
| <i>Migut.D00748</i> | LG4 | 3631903 | <i>AT2G29120.1</i> | Symbols: ATGLR2.7,<br>GLR2.7        | glutamate receptor 2.7                                                           |
| <i>Migut.D00749</i> | LG4 | 3634886 | <i>AT5G48400.2</i> | Symbols: ATGLR1.2,<br>GLR1.2        | Glutamate receptor family protein                                                |
| <i>Migut.D00750</i> | LG4 | 3639518 | <i>AT4G12840.2</i> | Symbols:                            | Protein of unknown function (DUF707)                                             |
| <i>Migut.D00751</i> | LG4 | 3643089 | <i>AT3G08750.1</i> | Symbols:                            | F-box and associated interaction domains-containing                              |
| <i>Migut.D00752</i> | LG4 | 3645466 | <i>AT4G13420.1</i> | Symbols: HAK5, ATHAK5               | high affinity K <sup>+</sup> transporter 5                                       |
| <i>Migut.D00753</i> | LG4 | 3652488 | <i>AT4G13420.1</i> | Symbols: HAK5, ATHAK5               | high affinity K <sup>+</sup> transporter 5                                       |
| <i>Migut.D00754</i> | LG4 | 3656989 | <i>AT5G52610.1</i> | Symbols:                            | F-box and associated interaction domains-containing                              |
| <i>Migut.D00755</i> | LG4 | 3659074 | <i>AT4G12740.1</i> | Symbols:                            | HhH-GPD base excision DNA repair family protein                                  |
| <i>Migut.D00756</i> | LG4 | 3662174 | <i>AT2G04039.2</i> | Symbols:                            | unknown protein; FUNCTIONS IN: molecular_function                                |
| <i>Migut.D00757</i> | LG4 | 3663520 | <i>AT3G07580.1</i> | Symbols:                            | unknown protein; FUNCTIONS IN: molecular_function                                |
| <i>Migut.D00758</i> | LG4 | 3667308 | <i>AT4G12760.1</i> | Symbols:                            | unknown protein; Has 30201 Blast hits to 17322                                   |
| <i>Migut.D00759</i> | LG4 | 3670195 | <i>AT4G12770.1</i> | Symbols:                            | Chaperone DnaJ-domain superfamily protein                                        |
| <i>Migut.D00760</i> | LG4 | 3676051 | <i>AT3G07565.1</i> | Symbols:                            | Protein of unknown function (DUF3755)                                            |
| <i>Migut.D00761</i> | LG4 | 3682244 | <i>AT3G25520.1</i> | Symbols: ATL5, PGY3,<br>OL15, RPL5A | ribosomal protein L5                                                             |
| <i>Migut.D00762</i> | LG4 | 3685713 | <i>AT3G25520.1</i> | Symbols: ATL5, PGY3,<br>OL15, RPL5A | ribosomal protein L5                                                             |
| <i>Migut.D00763</i> | LG4 | 3688684 | <i>AT4G12790.5</i> | Symbols:                            | P-loop containing nucleoside triphosphate hydrolases                             |
| <i>Migut.D00764</i> | LG4 | 3693077 | <i>AT5G48340.1</i> | Symbols:                            | unknown protein; Has 1807 Blast hits to 1807 proteins                            |
| <i>Migut.D00765</i> | LG4 | 3695547 | <i>AT2G39780.1</i> | Symbols: RNS2                       | ribonuclease 2                                                                   |
| <i>Migut.D00766</i> | LG4 | 3707173 | <i>AT3G07210.1</i> | Symbols:                            | unknown protein; Has 97 Blast hits to 85 proteins                                |
| <i>Migut.D00767</i> | LG4 | 3716976 | <i>AT3G25500.1</i> | Symbols: AFH1, FH1,<br>AHF1, ATFH1  | formin homology 1<br>Thioesterase/thiol ester dehydrase-isomerase<br>superfamily |
| <i>Migut.D00768</i> | LG4 | 3719309 | <i>AT5G48370.2</i> | Symbols:                            |                                                                                  |
| <i>Migut.D00769</i> | LG4 | 3723313 | <i>AT5G48380.1</i> | Symbols: BIR1                       | BAK1-interacting receptor-like kinase 1                                          |
| <i>Migut.D00770</i> | LG4 | 3729313 | <i>AT4G31710.1</i> | Symbols: ATGLR2.4,<br>GLR2.4        | glutamate receptor 2.4                                                           |
| <i>Migut.D00771</i> | LG4 | 3729433 | <i>AT5G48385.1</i> | Symbols:                            | FRIGIDA-like protein                                                             |
| <i>Migut.D00772</i> | LG4 | 3733490 | <i>AT5G48390.1</i> | Symbols: ATZIP4                     | Tetratricopeptide repeat (TPR)-like superfamily                                  |
| <i>Migut.D00773</i> | LG4 | 3737801 | <i>AT3G25480.1</i> | Symbols:                            | Rhodanese/Cell cycle control phosphatase superfamily                             |
| <i>Migut.D00774</i> | LG4 | 3744171 | <i>AT3G07525.2</i> | Symbols: ATG10,<br>ATATG10          | autophagocytosis-associated family                                               |
| <i>Migut.D00775</i> | LG4 | 3745894 | <i>AT3G25470.1</i> | Symbols:                            | bacterial hemolysin-related                                                      |
| <i>Migut.D00776</i> | LG4 | 3749066 | <i>AT4G12800.1</i> | Symbols: PSAL                       | photosystem I subunit I                                                          |
| <i>Migut.D00777</i> | LG4 | 3751207 | <i>AT4G12830.1</i> | Symbols:                            | alpha/beta-Hydrolases superfamily protein                                        |
| <i>Migut.D00778</i> | LG4 | 3753536 | <i>AT3G18240.2</i> | Symbols:                            | Ribosomal protein S24/S35, mitochondrial                                         |

|                     |     |         |                    |                                        |                                                       |
|---------------------|-----|---------|--------------------|----------------------------------------|-------------------------------------------------------|
| <i>Migut.D00779</i> | LG4 | 3758246 | <i>AT3G25530.1</i> | Symbols: GHBDH,<br>ATGHBDH, GLYR1, GR1 | glyoxylate reductase                                  |
| <i>Migut.D00780</i> | LG4 | 3761018 | <i>AT2G26970.1</i> | Symbols:                               | Polynucleotidyl transferase, ribonuclease H-like      |
| <i>Migut.D00781</i> | LG4 | 3765028 | <i>AT3G20000.1</i> | Symbols: TOM40                         | translocase of the outer mitochondrial membrane       |
| <i>Migut.D00782</i> | LG4 | 3771240 | <i>AT5G10860.1</i> | Symbols:                               | Cystathionine beta-synthase (CBS) family protein      |
| <i>Migut.D00783</i> | LG4 | 3772644 | <i>AT1G33330.1</i> | Symbols:                               | Class I peptide chain release factor                  |
| <i>Migut.D00784</i> | LG4 | 3775650 | <i>AT1G31480.1</i> | Symbols: SGR2                          | shoot gravitropism 2 (SGR2)                           |
| <i>Migut.D00785</i> | LG4 | 3783702 | <i>AT1G66560.1</i> | Symbols: UCH2                          | Peptidase C12, ubiquitin carboxyl-terminal            |
| <i>Migut.D00786</i> | LG4 | 3788964 | <i>AT1G02670.1</i> | Symbols:                               | P-loop containing nucleoside triphosphate hydrolases  |
| <i>Migut.D00787</i> | LG4 | 3790279 | <i>AT4G10360.2</i> | Symbols:                               | TRAM, LAG1 and CLN8 (TLC) lipid-sensing domain        |
| <i>Migut.D00788</i> | LG4 | 3793973 | <i>AT1G09575.1</i> | Symbols:                               | Protein of unknown function (DUF607)                  |
| <i>Migut.D00789</i> | LG4 | 3795430 | <i>AT1G31360.1</i> | Symbols: RECQL2,<br>ATRECQ2, MED34     | RECQ helicase L2                                      |
| <i>Migut.D00790</i> | LG4 | 3803004 | <i>AT5G24910.1</i> | Symbols: CYP714A1                      | cytochrome P450, family 714, subfamily                |
| <i>Migut.D00791</i> | LG4 | 3808254 | <i>AT1G29050.1</i> | Symbols: TBL38                         | TRICHOME BIREFRINGENCE-LIKE 38                        |
| <i>Migut.D00792</i> | LG4 | 3812210 | <i>AT5G42510.1</i> | Symbols:                               | Disease resistance-responsive (dirigent-like protein) |
| <i>Migut.D00793</i> | LG4 | 3814060 | <i>AT1G19070.1</i> | Symbols:                               | F-box family protein                                  |
| <i>Migut.D00794</i> | LG4 | 3817729 | <i>AT5G50400.1</i> | Symbols: ATPAP27,<br>PAP27             | purple acid phosphatase 27                            |
| <i>Migut.D00795</i> | LG4 | 3824721 | <i>AT5G50400.1</i> | Symbols: ATPAP27,<br>PAP27             | purple acid phosphatase 27                            |
| <i>Migut.D00796</i> | LG4 | 3832005 | <i>AT4G30880.1</i> | Symbols:                               | Bifunctional inhibitor/lipid-transfer protein/seed    |
| <i>Migut.D00797</i> | LG4 | 3833008 | <i>AT2G13440.1</i> | Symbols:                               | glucose-inhibited division family A protein           |
| <i>Migut.D00798</i> | LG4 | 3842609 | <i>AT1G52640.1</i> | Symbols:                               | Pentatricopeptide repeat (PPR) superfamily protein    |
| <i>Migut.D00799</i> | LG4 | 3844435 | <i>AT5G58260.1</i> | Symbols:                               | oxidoreductases, acting on NADH or NADPH, quinone     |
| <i>Migut.D00800</i> | LG4 | 3847277 | <i>AT5G58270.1</i> | Symbols: STA1, ATATM3,<br>ATM3         | ABC transporter of the mitochondrion                  |
| <i>Migut.D00801</i> | LG4 | 3859209 | <i>AT2G30530.1</i> | Symbols:                               | unknown protein; LOCATED IN: cellular_component       |
| <i>Migut.D00802</i> | LG4 | 3864538 | <i>AT3G08600.1</i> | Symbols:                               | Protein of unknown function (DUF1191)                 |
| <i>Migut.D00803</i> | LG4 | 3871504 | <i>AT2G38610.2</i> | Symbols:                               | RNA-binding KH domain-containing protein              |
| <i>Migut.D00804</i> | LG4 | 3876275 | <i>AT5G05370.1</i> | Symbols:                               | Cytochrome b-c1 complex, subunit 8 protein            |
| <i>Migut.D00805</i> | LG4 | 3878582 | <i>AT5G58280.1</i> | Symbols:                               | AP2/B3-like transcriptional factor family protein     |
| <i>Migut.D00806</i> | LG4 | 3881199 | <i>AT1G26910.1</i> | Symbols: RPL10B                        | Ribosomal protein L16p/L10e family protein            |
| <i>Migut.D00807</i> | LG4 | 3884485 | <i>AT1G06840.1</i> | Symbols:                               | Leucine-rich repeat protein kinase family protein     |
| <i>Migut.D00808</i> | LG4 | 3891843 | <i>AT1G06840.1</i> | Symbols:                               | Leucine-rich repeat protein kinase family protein     |
| <i>Migut.D00809</i> | LG4 | 3897974 | <i>AT4G16730.1</i> | Symbols: TPS02                         | terpene synthase 02                                   |
| <i>Migut.D00810</i> | LG4 | 3901385 | <i>AT5G58290.1</i> | Symbols: RPT3                          | regulatory particle triple-A ATPase 3                 |
| <i>Migut.D00811</i> | LG4 | 3906915 | <i>AT1G64230.2</i> | Symbols: UBC28                         | ubiquitin-conjugating enzyme 28                       |
| <i>Migut.D00812</i> | LG4 | 3912274 | <i>AT4G27950.1</i> | Symbols: CRF4                          | cytokinin response factor 4                           |
| <i>Migut.D00813</i> | LG4 | 3916151 | <i>AT5G20920.3</i> | Symbols: EIF2 BETA                     | eukaryotic translation initiation factor              |
| <i>Migut.D00814</i> | LG4 | 3921933 | <i>AT5G58320.2</i> | Symbols:                               | Kinase interacting (KIP1-like) family protein         |
| <i>Migut.D00815</i> | LG4 | 3925945 | <i>AT1G55150.1</i> | Symbols:                               | DEA(D/H)-box RNA helicase family protein              |
| <i>Migut.D00816</i> | LG4 | 3947886 | <i>AT2G30490.1</i> | Symbols: ATC4H, C4H,<br>CYP73A5, REF3  | cinnamate-4-hydroxylase                               |
| <i>Migut.D00817</i> | LG4 | 3951045 | <i>AT2G30480.3</i> | Symbols:                               | unknown protein; FUNCTIONS IN: molecular_function     |
| <i>Migut.D00818</i> | LG4 | 3958781 | <i>AT2G30470.1</i> | Symbols: HSI2, VAL1                    | high-level expression of sugar-inducible              |
| <i>Migut.D00819</i> | LG4 | 3967677 | <i>AT1G31930.3</i> | Symbols: XLG3                          | extra-large GTP-binding protein 3                     |
| <i>Migut.D00820</i> | LG4 | 3970160 | <i>AT1G06900.1</i> | Symbols:                               | Insulinase (Peptidase family M16) family protein      |

|                     |     |         |                    |                                                                |                                                                          |
|---------------------|-----|---------|--------------------|----------------------------------------------------------------|--------------------------------------------------------------------------|
| <i>Migut.D00821</i> | LG4 | 3981054 | <i>AT2G40610.1</i> | Symbols: ATEXPA8, EXP8,<br>ATEXP8, ATHEXP ALPHA<br>1.11, EXPA8 |                                                                          |
| <i>Migut.D00822</i> | LG4 | 3984339 | <i>AT1G06890.2</i> | Symbols:                                                       | nodulin MtN21 /EamA-like transporter family protein                      |
| <i>Migut.D00823</i> | LG4 | 3989792 | <i>AT3G10920.2</i> | Symbols: MSD1                                                  | manganese superoxide dismutase 1                                         |
| <i>Migut.D00824</i> | LG4 | 3993753 | <i>AT1G12520.3</i> | Symbols: ATCCS, CCS                                            | copper chaperone for SOD1                                                |
| <i>Migut.D00825</i> | LG4 | 3996510 | <i>AT2G40590.1</i> | Symbols:                                                       | Ribosomal protein S26e family protein                                    |
| <i>Migut.D00826</i> | LG4 | 4002207 | <i>AT3G51620.2</i> | Symbols:<br>Symbols: ATOFP17,<br>OFP17                         | PAP/OAS1 substrate-binding domain superfamily<br>ovate family protein 17 |
| <i>Migut.D00827</i> | LG4 | 4008617 | <i>AT2G30395.1</i> | Symbols: CHAL, EPFL6                                           | allergen-related                                                         |
| <i>Migut.D00828</i> | LG4 | 4010239 | <i>AT2G30370.1</i> | Symbols: CIPK11, PKS5,<br>SIP4, SNRK3.22                       | SOS3-interacting protein                                                 |
| <i>Migut.D00829</i> | LG4 | 4013848 | <i>AT2G30360.1</i> | Symbols:                                                       | P-loop containing nucleoside triphosphate hydrolases                     |
| <i>Migut.D00830</i> | LG4 | 4017317 | <i>AT5G58370.2</i> | Symbols:                                                       | Methyltransferase-related protein                                        |
| <i>Migut.D00831</i> | LG4 | 4022917 | <i>AT5G58375.1</i> | Symbols:                                                       | Excinuclease ABC, C subunit, N-terminal                                  |
| <i>Migut.D00832</i> | LG4 | 4025360 | <i>AT2G30350.2</i> | Symbols:                                                       | unknown protein; BEST Arabidopsis thaliana protein                       |
| <i>Migut.D00833</i> | LG4 | 4029875 | <i>AT2G40475.1</i> | Symbols:                                                       | Peroxidase superfamily protein                                           |
| <i>Migut.D00834</i> | LG4 | 4031069 | <i>AT5G05340.1</i> | Symbols:                                                       | Peroxidase superfamily protein                                           |
| <i>Migut.D00835</i> | LG4 | 4051763 | <i>AT5G05340.1</i> | Symbols:<br>Symbols: ATTIC110,<br>TIC110                       | translocon at the inner envelope                                         |
| <i>Migut.D00836</i> | LG4 | 4054829 | <i>AT1G06950.1</i> | Symbols:                                                       | Major facilitator superfamily protein                                    |
| <i>Migut.D00837</i> | LG4 | 4067644 | <i>AT2G30300.1</i> | Symbols: PYD4                                                  | PYRIMIDINE 4                                                             |
| <i>Migut.D00838</i> | LG4 | 4072060 | <i>AT3G08860.1</i> | Symbols:                                                       | HEAT/U-box domain-containing protein                                     |
| <i>Migut.D00839</i> | LG4 | 4075617 | <i>AT5G58410.1</i> | Symbols: ATST2A, ST2A                                          | sulfotransferase 2A                                                      |
| <i>Migut.D00840</i> | LG4 | 4088128 | <i>AT5G07010.1</i> | Symbols:                                                       | mitochondrial 28S ribosomal protein S29-related                          |
| <i>Migut.D00841</i> | LG4 | 4091265 | <i>AT1G16870.1</i> | Symbols: WRKY33,<br>ATWRKY33                                   | WRKY DNA-binding protein 33                                              |
| <i>Migut.D00842</i> | LG4 | 4099032 | <i>AT2G38470.1</i> | Symbols:                                                       | methyltransferases                                                       |
| <i>Migut.D00843</i> | LG4 | 4103139 | <i>AT5G01710.1</i> | Symbols:                                                       | unknown protein; FUNCTIONS IN: molecular_function                        |
| <i>Migut.D00844</i> | LG4 | 4106802 | <i>AT1G06980.1</i> | Symbols:                                                       | GDSL-like Lipase/Acylhydrolase family protein                            |
| <i>Migut.D00845</i> | LG4 | 4113239 | <i>AT2G30310.1</i> | Symbols: ATEXO70B1,<br>EXO70B1                                 | exocyst subunit exo70 family                                             |
| <i>Migut.D00846</i> | LG4 | 4115065 | <i>AT5G58430.1</i> | Symbols:                                                       | BEST Arabidopsis thaliana protein match is: mucin-related                |
| <i>Migut.D00847</i> | LG4 | 4120017 | <i>AT5G62270.1</i> | Symbols: ATCHX25,<br>CHX25                                     | cation/H <sup>+</sup> exchanger 25                                       |
| <i>Migut.D00848</i> | LG4 | 4124149 | <i>AT5G58460.1</i> | Symbols:                                                       | Calcineurin-like metallo-phosphoesterase superfamily                     |
| <i>Migut.D00849</i> | LG4 | 4135715 | <i>AT1G07010.1</i> | Symbols:                                                       | Protein phosphatase 2C family protein                                    |
| <i>Migut.D00850</i> | LG4 | 4140539 | <i>AT2G30170.1</i> | Symbols:                                                       | Mitochondrial substrate carrier family protein                           |
| <i>Migut.D00851</i> | LG4 | 4142782 | <i>AT1G07030.1</i> | Symbols:                                                       | unknown protein; BEST Arabidopsis thaliana protein                       |
| <i>Migut.D00852</i> | LG4 | 4147894 | <i>AT3G14750.1</i> | Symbols:                                                       | ferritin 4                                                               |
| <i>Migut.D00853</i> | LG4 | 4151427 | <i>AT2G40300.1</i> | Symbols: ATFER4, FER4                                          |                                                                          |
| <i>Migut.D00854</i> | LG4 | 4155563 | <i>AT1G07090.1</i> | Symbols: LSH6                                                  | Protein of unknown function (DUF640)                                     |
| <i>Migut.D00855</i> | LG4 | 4157406 | <i>AT2G30105.1</i> | Symbols:                                                       | CONTAINS InterPro DOMAIN/s: Leucine-rich repeat,                         |
| <i>Migut.D00856</i> | LG4 | 4166564 | <i>AT2G30105.1</i> | Symbols:                                                       | CONTAINS InterPro DOMAIN/s: Leucine-rich repeat,                         |
| <i>Migut.D00857</i> | LG4 | 4186447 | <i>AT2G29970.1</i> | Symbols:                                                       | Double Clp-N motif-containing P-loop nucleoside                          |
| <i>Migut.D00858</i> | LG4 | 4191323 | <i>AT2G29960.1</i> | Symbols: CYP5, ATCYP5,<br>CYP19-4                              | cyclophilin 5                                                            |
| <i>Migut.D00859</i> | LG4 | 4194513 | <i>AT2G29650.1</i> | Symbols: ANTR1, PHT4;1<br>Symbols: CYP86A1,<br>CYP86           | phosphate transporter 4;1<br>cytochrome P450, family 86, subfamily       |
| <i>Migut.D00860</i> | LG4 | 4197973 | <i>AT5G58860.1</i> |                                                                |                                                                          |

|                     |     |         |                    |                                                     |                                                       |
|---------------------|-----|---------|--------------------|-----------------------------------------------------|-------------------------------------------------------|
| <i>Migut.D00861</i> | LG4 | 4201438 | <i>AT5G26250.1</i> | Symbols:                                            | Major facilitator superfamily protein                 |
| <i>Migut.D00862</i> | LG4 | 4204420 | <i>AT3G47000.1</i> | Symbols:                                            | Glycosyl hydrolase family protein                     |
| <i>Migut.D00863</i> | LG4 | 4209387 | <i>AT2G29590.1</i> | Symbols:                                            | Thioesterase superfamily protein                      |
| <i>Migut.D00864</i> | LG4 | 4211747 | <i>AT3G46960.1</i> | Symbols:                                            | RNA helicase, ATP-dependent, SK12/DOB1 protein        |
| <i>Migut.D00865</i> | LG4 | 4227204 | <i>AT5G59613.2</i> | Symbols:                                            | unknown protein; FUNCTIONS IN: molecular_function     |
| <i>Migut.D00866</i> | LG4 | 4231182 | <i>AT2G30040.1</i> | Symbols: MAPKKK14                                   | mitogen-activated protein kinase kinase               |
| <i>Migut.D00867</i> | LG4 | 4233426 | <i>AT5G05950.1</i> | Symbols: MEE60                                      | maternal effect embryo arrest 60                      |
| <i>Migut.D00868</i> | LG4 | 4235321 | <i>AT1G07410.1</i> | Symbols: ATRABA2B,<br>RAB-A2B, ATRAB-A2B,<br>RABA2b | RAB GTPase                                            |
| <i>Migut.D00869</i> | LG4 | 4237853 | <i>AT2G46800.2</i> | Symbols: ZAT, ATMTP1,<br>MTP1, ZAT1, ATCDF1         | zinc transporter                                      |
| <i>Migut.D00870</i> | LG4 | 4242158 | <i>AT5G59160.3</i> | Symbols: TOPP2, PPO                                 | type one serine/threonine protein phosphatase         |
| <i>Migut.D00871</i> | LG4 | 4247620 | <i>AT5G38630.1</i> | Symbols: ACYB-1, CYB-1                              | cytochrome B561-1                                     |
| <i>Migut.D00872</i> | LG4 | 4249268 | <i>AT3G46790.1</i> | Symbols: CRR2                                       | Tetratricopeptide repeat (TPR)-like superfamily       |
| <i>Migut.D00873</i> | LG4 | 4252647 | <i>AT1G07420.1</i> | Symbols: ATSMO2,<br>SMO2-1                          | sterol 4-alpha-methyl-oxidase 2-1                     |
| <i>Migut.D00874</i> | LG4 | 4257062 | <i>AT2G29380.1</i> | Symbols: HAI3                                       | highly ABA-induced PP2C gene 3                        |
| <i>Migut.D00875</i> | LG4 | 4259442 | <i>AT5G12460.1</i> | Symbols:                                            | Protein of unknown function (DUF604)                  |
| <i>Migut.D00876</i> | LG4 | 4261865 | <i>AT3G46780.1</i> | Symbols: PTAC16                                     | plastid transcriptionally active 16                   |
| <i>Migut.D00877</i> | LG4 | 4264837 | <i>AT2G29210.1</i> | Symbols:                                            | splicing factor PWI domain-containing protein         |
| <i>Migut.D00878</i> | LG4 | 4276556 | <i>AT1G07470.1</i> | Symbols:                                            | Transcription factor IIA, alpha/beta subunit          |
| <i>Migut.D00879</i> | LG4 | 4283366 | <i>AT5G59250.1</i> | Symbols:                                            | Major facilitator superfamily protein                 |
| <i>Migut.D00880</i> | LG4 | 4287591 | <i>AT3G46750.1</i> | Symbols:                                            | unknown protein; Has 2631 Blast hits to 1984 proteins |
| <i>Migut.D00881</i> | LG4 | 4290784 | <i>AT4G13650.1</i> | Symbols:                                            | Pentatricopeptide repeat (PPR) superfamily protein    |
| <i>Migut.D00882</i> | LG4 | 4293738 | <i>AT3G46740.1</i> | Symbols: TOC75-III,<br>MAR1                         | translocon at the outer envelope                      |
| <i>Migut.D00883</i> | LG4 | 4299100 | <i>AT5G59610.1</i> | Symbols:                                            | Chaperone DnaJ-domain superfamily protein             |
| <i>Migut.D00884</i> | LG4 | 4303466 | <i>AT3G46640.2</i> | Symbols: PCL1                                       | Homeodomain-like superfamily protein                  |
| <i>Migut.D00885</i> | LG4 | 4305674 | <i>AT2G29180.1</i> | Symbols:                                            | unknown protein; FUNCTIONS IN: molecular_function     |
| <i>Migut.D00886</i> | LG4 | 4308918 | <i>AT2G29200.1</i> | Symbols: APUM1, PUM1                                | pumilio 1                                             |
| <i>Migut.D00887</i> | LG4 | 4316264 | <i>AT3G20190.1</i> | Symbols:                                            | Leucine-rich repeat protein kinase family protein     |
| <i>Migut.D00888</i> | LG4 | 4319956 | <i>AT1G78895.1</i> | Symbols:                                            | Reticulon family protein                              |
| <i>Migut.D00889</i> | LG4 | 4322782 | <i>AT1G78900.2</i> | Symbols: VHA-A                                      | vacuolar ATP synthase subunit A                       |
| <i>Migut.D00890</i> | LG4 | 4328816 | <i>AT4G30010.1</i> | Symbols:                                            | unknown protein; FUNCTIONS IN: molecular_function     |
| <i>Migut.D00891</i> | LG4 | 4329255 | <i>AT5G64820.1</i> | Symbols:                                            | unknown protein; FUNCTIONS IN: molecular_function     |
| <i>Migut.D00892</i> | LG4 | 4331370 | <i>AT4G31540.1</i> | Symbols: ATEXO70G1,<br>EXO70G1                      | exocyst subunit exo70 family                          |
| <i>Migut.D00893</i> | LG4 | 4333720 | <i>AT1G08130.1</i> | Symbols: ATLIG1, LIG1                               | DNA ligase 1                                          |
| <i>Migut.D00894</i> | LG4 | 4343272 | <i>AT3G21200.1</i> | Symbols: PGR7                                       | proton gradient regulation 7                          |
| <i>Migut.D00895</i> | LG4 | 4346414 | <i>AT2G29110.1</i> | Symbols: ATGLR2.8,<br>GLR2.8                        | glutamate receptor 2.8                                |
| <i>Migut.D00896</i> | LG4 | 4350740 | <i>AT2G04270.2</i> | Symbols: RNEE/G                                     | RNAse E/G-like                                        |
| <i>Migut.D00897</i> | LG4 | 4357292 | <i>AT3G21215.1</i> | Symbols:                                            | RNA-binding (RRM/RBD/RNP motifs) family protein       |
| <i>Migut.D00898</i> | LG4 | 4361896 | <i>AT2G18740.1</i> | Symbols:                                            | Small nuclear ribonucleoprotein family protein        |
| <i>Migut.D00899</i> | LG4 | 4363252 | <i>AT1G17745.1</i> | Symbols: PGDH                                       | D-3-phosphoglycerate dehydrogenase                    |
| <i>Migut.D00900</i> | LG4 | 4366727 | <i>AT1G73050.1</i> | Symbols:                                            | Glucose-methanol-choline (GMC) oxidoreductase family  |

|                     |     |         |                    |                                                                      |                                                      |
|---------------------|-----|---------|--------------------|----------------------------------------------------------------------|------------------------------------------------------|
| <i>Migut.D00901</i> | LG4 | 4369950 | <i>AT3G21220.1</i> | Symbols: ATMKK5,<br>ATMAP2K_ALPHA,<br>MAP2K_A, MKK5,<br>ATMEK5, MEK5 |                                                      |
| <i>Migut.D00902</i> | LG4 | 4372712 | <i>AT1G72300.1</i> | Symbols:                                                             | Leucine-rich receptor-like protein kinase family     |
| <i>Migut.D00903</i> | LG4 | 4377057 | <i>AT1G53710.1</i> | Symbols:                                                             | Calcineurin-like metallo-phosphoesterase superfamily |
| <i>Migut.D00904</i> | LG4 | 4381545 | <i>AT1G53708.1</i> | Symbols: RTFL9                                                       | ROTUNDIFOLIA like 9                                  |
| <i>Migut.D00905</i> | LG4 | 4386518 | <i>AT3G14360.1</i> | Symbols:                                                             | alpha/beta-Hydrolases superfamily protein            |
| <i>Migut.D00906</i> | LG4 | 4389731 | <i>AT1G53750.1</i> | Symbols: RPT1A                                                       | regulatory particle triple-A 1A                      |
| <i>Migut.D00907</i> | LG4 | 4395217 | <i>AT1G53800.1</i> | Symbols:                                                             | unknown protein; BEST Arabidopsis thaliana protein   |
| <i>Migut.D00908</i> | LG4 | 4400035 | <i>AT1G53820.1</i> | Symbols:                                                             | RING/U-box superfamily protein                       |
| <i>Migut.D00909</i> | LG4 | 4403014 | <i>AT1G11180.1</i> | Symbols:                                                             | Secretory carrier membrane protein (SCAMP) family    |
| <i>Migut.D00910</i> | LG4 | 4410169 | <i>AT1G53840.1</i> | Symbols: ATPME1, PME1                                                | pectin methylesterase 1                              |
| <i>Migut.D00911</i> | LG4 | 4416642 | <i>AT1G72330.1</i> | Symbols: ALAAT2                                                      | alanine aminotransferase 2                           |
| <i>Migut.D00912</i> | LG4 | 4420273 | <i>AT1G53850.2</i> | Symbols: PAE1                                                        | 20S proteasome alpha subunit E1                      |
| <i>Migut.D00913</i> | LG4 | 4424096 | <i>AT3G14270.1</i> | Symbols: FAB1B                                                       | phosphatidylinositol-4-phosphate 5-kinase            |
| <i>Migut.D00914</i> | LG4 | 4436535 | <i>AT3G14260.1</i> | Symbols:                                                             | Protein of unknown function (DUF567)                 |
| <i>Migut.D00915</i> | LG4 | 4439786 | <i>AT1G53900.1</i> | Symbols:                                                             | Eukaryotic translation initiation factor 2B (eIF-2B) |
| <i>Migut.D00916</i> | LG4 | 4447927 | <i>AT1G53903.1</i> | Symbols:                                                             | Protein of unknown function (DUF581)                 |
| <i>Migut.D00917</i> | LG4 | 4452715 | <i>AT1G53910.3</i> | Symbols: RAP2.12                                                     | related to AP2 12                                    |
| <i>Migut.D00918</i> | LG4 | 4458378 | <i>AT1G56220.3</i> | Symbols:                                                             | Dormancy/auxin associated family protein             |
| <i>Migut.D00919</i> | LG4 | 4461006 | <i>AT4G26340.1</i> | Symbols:                                                             | F-box/RNI-like/FBD-like domains-containing protein   |
| <i>Migut.D00920</i> | LG4 | 4473294 | <i>AT4G26340.1</i> | Symbols:                                                             | F-box/RNI-like/FBD-like domains-containing protein   |
| <i>Migut.D00921</i> | LG4 | 4475156 | <i>AT3G14172.2</i> | Symbols:                                                             | FUNCTIONS IN: molecular_function unknown; INVOLVED   |
| <i>Migut.D00922</i> | LG4 | 4484607 | <i>AT3G14170.1</i> | Symbols:                                                             | Plant protein of unknown function (DUF936)           |
| <i>Migut.D00923</i> | LG4 | 4489886 | <i>AT1G11890.1</i> | Symbols: SEC22, ATSEC22                                              | Synaptobrevin family protein                         |
| <i>Migut.D00924</i> | LG4 | 4493758 | <i>AT3G14120.1</i> | Symbols:                                                             | FUNCTIONS IN: molecular_function unknown; INVOLVED   |
| <i>Migut.D00925</i> | LG4 | 4506702 | <i>AT1G17370.1</i> | Symbols: UBP1B                                                       | oligouridylylate binding protein 1B                  |
| <i>Migut.D00926</i> | LG4 | 4512244 | <i>AT1G19180.2</i> | Symbols: TIFY10A                                                     | jasmonate-zim-domain protein 1                       |
| <i>Migut.D00927</i> | LG4 | 4517306 | <i>AT3G42880.1</i> | Symbols:                                                             | Leucine-rich repeat protein kinase family protein    |
| <i>Migut.D00928</i> | LG4 | 4520270 | <i>AT1G72470.1</i> | Symbols: ATEXO70D1,<br>EXO70D1                                       | exocyst subunit exo70 family                         |
| <i>Migut.D00929</i> | LG4 | 4524040 | <i>AT1G72480.1</i> | Symbols:                                                             | Lung seven transmembrane receptor family protein     |
| <i>Migut.D00930</i> | LG4 | 4528667 | <i>AT3G14080.2</i> | Symbols:                                                             | Small nuclear ribonucleoprotein family protein       |
| <i>Migut.D00931</i> | LG4 | 4532178 | <i>AT1G72490.1</i> | Symbols:                                                             | unknown protein; BEST Arabidopsis thaliana protein   |
| <i>Migut.D00932</i> | LG4 | 4539530 | <i>AT3G14075.2</i> | Symbols:                                                             | Mono-/di-acylglycerol lipase, N-terminal;Lipase,     |
| <i>Migut.D00933</i> | LG4 | 4549203 | <i>AT1G54100.2</i> | Symbols: ALDH7B4                                                     | aldehyde dehydrogenase 7B4                           |
| <i>Migut.D00934</i> | LG4 | 4561709 | <i>AT1G54120.1</i> | Symbols:                                                             | unknown protein; BEST Arabidopsis thaliana protein   |
| <i>Migut.D00935</i> | LG4 | 4564484 | <i>AT3G14050.1</i> | Symbols: RSH2, AT-RSH2,<br>ATRSH2                                    | RELA/SPOT homolog 2                                  |
| <i>Migut.D00936</i> | LG4 | 4569613 | <i>AT4G16110.1</i> | Symbols: ARR2, RR2                                                   | response regulator 2                                 |
| <i>Migut.D00937</i> | LG4 | 4576274 | <i>AT1G72610.1</i> | Symbols: GLP1, ATGER1,<br>GER1                                       | germin-like protein 1                                |
| <i>Migut.D00938</i> | LG4 | 4580353 |                    |                                                                      |                                                      |
| <i>Migut.D00939</i> | LG4 | 4593353 | <i>AT1G54210.1</i> | Symbols: APG12,<br>ATG12A, ATATG12                                   | Ubiquitin-like superfamily                           |
| <i>Migut.D00940</i> | LG4 | 4595811 | <i>AT1G17455.2</i> | Symbols: ELF4-L4                                                     | ELF4-like 4                                          |
| <i>Migut.D00941</i> | LG4 | 4598086 | <i>AT1G72640.2</i> | Symbols:                                                             | NAD(P)-binding Rossmann-fold superfamily protein     |

|                     |     |         |                    |                                               |                                                               |
|---------------------|-----|---------|--------------------|-----------------------------------------------|---------------------------------------------------------------|
| <i>Migut.D00942</i> | LG4 | 4601845 | <i>AT1G72650.1</i> | Symbols: TRFL6                                | TRF-like 6                                                    |
| <i>Migut.D00943</i> | LG4 | 4610404 | <i>AT3G13980.1</i> | Symbols:                                      | unknown protein; BEST Arabidopsis thaliana protein            |
| <i>Migut.D00944</i> | LG4 | 4614640 | <i>AT5G13640.1</i> | Symbols: ATPDAT, PDAT, PDAT1                  | phospholipid:diacylglycerol                                   |
| <i>Migut.D00945</i> | LG4 | 4626297 | <i>AT3G14010.3</i> | Symbols: CID4                                 | CTC-interacting domain 4                                      |
| <i>Migut.D00946</i> | LG4 | 4633073 | <i>AT5G20510.1</i> | Symbols: AL5                                  | alfin-like 5                                                  |
| <i>Migut.D00947</i> | LG4 | 4638400 | <i>AT5G48490.1</i> | Symbols:                                      | Bifunctional inhibitor/lipid-transfer protein/seed            |
| <i>Migut.D00948</i> | LG4 | 4640363 | <i>AT3G13940.1</i> | Symbols:                                      | DNA binding;DNA-directed RNA polymerases                      |
| <i>Migut.D00949</i> | LG4 | 4642843 | <i>AT1G72770.3</i> | Symbols: HAB1                                 | homology to ABI1                                              |
| <i>Migut.D00950</i> | LG4 | 4648947 | <i>AT5G26150.1</i> | Symbols:                                      | protein kinase family protein                                 |
| <i>Migut.D00951</i> | LG4 | 4657023 | <i>AT1G17530.1</i> | Symbols: ATTIM23-1, TIM23-1                   | translocase of inner mitochondrial                            |
| <i>Migut.D00952</i> | LG4 | 4658479 | <i>AT3G13930.1</i> | Symbols:                                      | Dihydroliipoamide acetyltransferase, long form protein        |
| <i>Migut.D00953</i> | LG4 | 4666761 | <i>AT1G17520.1</i> | Symbols:                                      | Homeodomain-like/winged-helix DNA-binding family              |
| <i>Migut.D00954</i> | LG4 | 4671322 | <i>AT3G13920.1</i> | Symbols: EIF4A1, RH4, TIF4A1                  | eukaryotic translation initiation                             |
| <i>Migut.D00955</i> | LG4 | 4676448 | <i>AT5G11970.1</i> | Symbols:                                      | Protein of unknown function (DUF3511)                         |
| <i>Migut.D00956</i> | LG4 | 4678552 | <i>AT1G72710.1</i> | Symbols: CKL2                                 | casein kinase 1-like protein 2                                |
| <i>Migut.D00957</i> | LG4 | 4683934 | <i>AT1G17500.1</i> | Symbols:                                      | ATPase E1-E2 type family protein / haloacid dehalogenase-like |
| <i>Migut.D00958</i> | LG4 | 4694507 | <i>AT1G60970.1</i> | Symbols:                                      | SNARE-like superfamily protein                                |
| <i>Migut.D00959</i> | LG4 | 4696708 | <i>AT3G13898.1</i> | Symbols:                                      | unknown protein; LOCATED IN: endomembrane system;             |
| <i>Migut.D00960</i> | LG4 | 4698818 | <i>AT1G72690.1</i> | Symbols:                                      | unknown protein; BEST Arabidopsis thaliana protein            |
| <i>Migut.D00961</i> | LG4 | 4700782 | <i>AT1G72670.1</i> | Symbols: iqd8                                 | IQ-domain 8                                                   |
| <i>Migut.D00962</i> | LG4 | 4707548 | <i>AT3G13882.1</i> | Symbols:                                      | Ribosomal protein L34                                         |
| <i>Migut.D00963</i> | LG4 | 4710692 | <i>AT1G17650.1</i> | Symbols: GLYR2, GR2                           | glyoxylate reductase 2                                        |
| <i>Migut.D00964</i> | LG4 | 4715473 | <i>AT3G13780.1</i> | Symbols:                                      | SMAD/FHA domain-containing protein                            |
| <i>Migut.D00965</i> | LG4 | 4717424 | <i>AT3G13845.1</i> | Symbols:                                      | unknown protein; FUNCTIONS IN: molecular_function             |
| <i>Migut.D00966</i> | LG4 | 4721033 | <i>AT3G13850.1</i> | Symbols: LBD22                                | LOB domain-containing protein 22                              |
| <i>Migut.D00967</i> | LG4 | 4723626 | <i>AT1G17620.1</i> | Symbols:                                      | Late embryogenesis abundant (LEA) hydroxyproline-rich         |
| <i>Migut.D00968</i> | LG4 | 4727986 | <i>AT5G53790.1</i> | Symbols:                                      | Protein of unknown function (DUF295)                          |
| <i>Migut.D00969</i> | LG4 | 4730543 | <i>AT3G13870.1</i> | Symbols: RHD3                                 | Root hair defective 3 GTP-binding protein (RHD3)              |
| <i>Migut.D00970</i> | LG4 | 4743699 | <i>AT2G19520.1</i> | Symbols: FVE, ACG1, MSI4, NFC4, NFC04, ATMSI4 | Transducin                                                    |
| <i>Migut.D00971</i> | LG4 | 4750271 | <i>AT3G13772.1</i> | Symbols: TMN7, AtTMN7                         | transmembrane nine 7                                          |
| <i>Migut.D00972</i> | LG4 | 4754793 | <i>AT3G13750.1</i> | Symbols: BGAL1                                | beta galactosidase 1                                          |
| <i>Migut.D00973</i> | LG4 | 4770686 | <i>AT1G55170.1</i> | Symbols:                                      | unknown protein; BEST Arabidopsis thaliana protein            |
| <i>Migut.D00974</i> | LG4 | 4778826 | <i>AT1G55190.1</i> | Symbols: PRA1.F2, PRA7                        | PRA1 (Prenylated rab acceptor) family                         |
| <i>Migut.D00975</i> | LG4 | 4780016 | <i>AT1G55200.1</i> | Symbols:                                      | Protein kinase protein with adenine nucleotide                |
| <i>Migut.D00976</i> | LG4 | 4796879 | <i>AT1G51700.1</i> | Symbols: ADOF1, DOF1                          | DOF zinc finger protein 1                                     |
| <i>Migut.D00977</i> | LG4 | 4799940 | <i>AT1G17720.2</i> | Symbols: ATB BETA                             | Protein phosphatase 2A, regulatory subunit                    |
| <i>Migut.D00978</i> | LG4 | 4809170 | <i>AT1G51720.1</i> | Symbols:                                      | Amino acid dehydrogenase family protein                       |
| <i>Migut.D00979</i> | LG4 | 4815781 | <i>AT4G29410.2</i> | Symbols:                                      | Ribosomal L28e protein family                                 |
| <i>Migut.D00980</i> | LG4 | 4818259 | <i>AT3G21295.1</i> | Symbols:                                      | Tudor/PWWP/MBT superfamily protein                            |
| <i>Migut.D00981</i> | LG4 | 4822769 | <i>AT1G73040.1</i> | Symbols:                                      | Mannose-binding lectin superfamily protein                    |
| <i>Migut.D00982</i> | LG4 | 4824633 |                    |                                               |                                                               |



|                     |     |         |                    |                                                        |                                                             |
|---------------------|-----|---------|--------------------|--------------------------------------------------------|-------------------------------------------------------------|
| <i>Migut.D00983</i> | LG4 | 4827114 | <i>AT5G11730.1</i> | Symbols:                                               | Core-2/I-branching beta-1,6-N-acetylglucosaminyltransferase |
| <i>Migut.D00984</i> | LG4 | 4830395 | <i>AT2G04220.1</i> | Symbols:                                               | Plant protein of unknown function (DUF868)                  |
| <i>Migut.D00985</i> | LG4 | 4832278 | <i>AT1G52080.1</i> | Symbols: AR791                                         | actin binding protein family                                |
| <i>Migut.D00986</i> | LG4 | 4845078 | <i>AT3G16490.1</i> | Symbols: IQD26                                         | IQ-domain 26                                                |
| <i>Migut.D00987</i> | LG4 | 4849937 | <i>AT4G32850.3</i> | Symbols: nPAP                                          | nuclear poly(a) polymerase                                  |
| <i>Migut.D00988</i> | LG4 | 4856772 | <i>AT2G19860.1</i> | Symbols: ATHXK2, HXK2                                  | hexokinase 2                                                |
| <i>Migut.D00989</i> | LG4 | 4860922 | <i>AT3G16500.1</i> | Symbols: PAP1, IAA26                                   | phytochrome-associated protein 1                            |
| <i>Migut.D00990</i> | LG4 | 4871721 | <i>AT3G59780.1</i> | Symbols:                                               | Rhodanese/Cell cycle control phosphatase superfamily        |
| <i>Migut.D00991</i> | LG4 | 4876610 | <i>AT1G79730.1</i> | Symbols: ELF7                                          | hydroxyproline-rich glycoprotein family protein             |
| <i>Migut.D00992</i> | LG4 | 4880040 | <i>AT2G22460.1</i> | Symbols:                                               | Protein of unknown function, DUF617                         |
| <i>Migut.D00993</i> | LG4 | 4882348 | <i>AT1G79750.1</i> | Symbols: ATNADP-ME4, NADP-ME4                          | NADP-malic enzyme 4                                         |
| <i>Migut.D00994</i> | LG4 | 4903266 | <i>AT3G16340.1</i> | Symbols: ATPDR1, PDR1                                  | pleiotropic drug resistance 1                               |
| <i>Migut.D00995</i> | LG4 | 4933258 | <i>AT1G06150.2</i> | Symbols:                                               | basic helix-loop-helix (bHLH) DNA-binding superfamily       |
| <i>Migut.D00996</i> | LG4 | 4937141 | <i>AT1G06620.1</i> | Symbols:                                               | 2-oxoglutarate (2OG) and Fe(II)-dependent oxygenase         |
| <i>Migut.D00997</i> | LG4 | 4940538 | <i>AT1G06640.2</i> | Symbols:                                               | 2-oxoglutarate (2OG) and Fe(II)-dependent oxygenase         |
| <i>Migut.D00998</i> | LG4 | 4957544 | <i>AT2G48030.1</i> | Symbols:                                               | DNAse I-like superfamily protein                            |
| <i>Migut.D00999</i> | LG4 | 4958729 | <i>AT3G06895.1</i> | Symbols:                                               | unknown protein; Has 2 Blast hits to 2 proteins             |
| <i>Migut.D01000</i> | LG4 | 4958970 | <i>AT2G48020.1</i> | Symbols:                                               | Major facilitator superfamily protein                       |
| <i>Migut.D01001</i> | LG4 | 4964258 | <i>AT2G48010.1</i> | Symbols: RKF3                                          | receptor-like kinase in in flowers 3                        |
| <i>Migut.D01002</i> | LG4 | 4984500 | <i>AT1G52140.1</i> | Symbols:                                               | unknown protein; BEST Arabidopsis thaliana protein          |
| <i>Migut.D01003</i> | LG4 | 4986600 | <i>ATCG00040.1</i> | Symbols: MATK                                          | maturase K                                                  |
| <i>Migut.D01004</i> | LG4 | 4993878 | <i>AT1G52140.1</i> | Symbols:                                               | unknown protein; BEST Arabidopsis thaliana protein          |
| <i>Migut.D01005</i> | LG4 | 4995033 | <i>AT1G52150.1</i> | Symbols: ATHB-15, ATHB15, CNA, ICU4                    | Homeobox-leucine zipper                                     |
| <i>Migut.D01006</i> | LG4 | 5006133 | <i>AT3G16240.1</i> | Symbols: DELTA-TIP, TIP2;1, DELTA-TIP1, AQP1, ATTIP2;1 | delta                                                       |
| <i>Migut.D01007</i> | LG4 | 5011998 | <i>AT2G26490.1</i> | Symbols:                                               | Transducin/WD40 repeat-like superfamily protein             |
| <i>Migut.D01008</i> | LG4 | 5017788 | <i>AT5G11180.1</i> | Symbols: ATGLR2.6, GLR2.6                              | glutamate receptor 2.6                                      |
| <i>Migut.D01009</i> | LG4 | 5018640 | <i>AT3G16200.1</i> | Symbols:                                               | unknown protein; Has 97 Blast hits to 97 proteins           |
| <i>Migut.D01010</i> | LG4 | 5021720 | <i>AT3G27750.1</i> | Symbols:                                               | FUNCTIONS IN: molecular_function unknown; INVOLVED          |
| <i>Migut.D01011</i> | LG4 | 5023117 | <i>AT1G79810.1</i> | Symbols: TED3, PEX2, ATPEX2                            | Pex2/Pex12 N-terminal domain-containing                     |
| <i>Migut.D01012</i> | LG4 | 5032061 | <i>AT4G29100.1</i> | Symbols:                                               | basic helix-loop-helix (bHLH) DNA-binding superfamily       |
| <i>Migut.D01013</i> | LG4 | 5037461 | <i>AT3G16190.1</i> | Symbols:                                               | Isochorismatase family protein                              |
| <i>Migut.D01014</i> | LG4 | 5039305 | <i>AT3G16190.1</i> | Symbols:                                               | Isochorismatase family protein                              |
| <i>Migut.D01015</i> | LG4 | 5042121 | <i>AT1G79830.3</i> | Symbols: GC5                                           | golgin candidate 5                                          |
| <i>Migut.D01016</i> | LG4 | 5051406 | <i>AT1G52220.1</i> | Symbols:                                               | FUNCTIONS IN: molecular_function unknown; INVOLVED          |
| <i>Migut.D01017</i> | LG4 | 5054925 | <i>AT1G52230.1</i> | Symbols: PSAH2, PSAH-2, PSI-H                          | photosystem I subunit H2                                    |
| <i>Migut.D01018</i> | LG4 | 5056532 | <i>AT3G24620.1</i> | Symbols: ATROPGEF8, ROPGEF8                            | RHO guanyl-nucleotide exchange                              |
| <i>Migut.D01019</i> | LG4 | 5062150 | <i>AT1G79870.1</i> | Symbols:                                               | D-isomer specific 2-hydroxyacid dehydrogenase family        |
| <i>Migut.D01020</i> | LG4 | 5064794 | <i>AT1G52240.2</i> | Symbols: ATROPGEF11, ROPGEF11, PIRF1                   | RHO guanyl-nucleotide                                       |
| <i>Migut.D01021</i> | LG4 | 5073477 | <i>AT1G15230.1</i> | Symbols:                                               | unknown protein; FUNCTIONS IN: molecular_function           |

|                     |     |         |                    |                                     |                                                                                                           |
|---------------------|-----|---------|--------------------|-------------------------------------|-----------------------------------------------------------------------------------------------------------|
| <i>Migut.D01022</i> | LG4 | 5075712 | <i>AT3G16080.1</i> | Symbols:                            | Zinc-binding ribosomal protein family protein                                                             |
| <i>Migut.D01023</i> | LG4 | 5078442 | <i>AT3G16050.1</i> | Symbols: A37, ATPDX1.2,<br>PDX1.2   | pyridoxine biosynthesis 1.2                                                                               |
| <i>Migut.D01024</i> | LG4 | 5082225 | <i>AT3G16060.1</i> | Symbols:                            | ATP binding microtubule motor family protein                                                              |
| <i>Migut.D01025</i> | LG4 | 5086557 | <i>AT1G79900.1</i> | Symbols: ATMBAC2,<br>BAC2           | Mitochondrial substrate carrier family                                                                    |
| <i>Migut.D01026</i> | LG4 | 5090546 | <i>AT1G15270.1</i> | Symbols:                            | Translation machinery associated TMA7                                                                     |
| <i>Migut.D01027</i> | LG4 | 5093392 | <i>AT4G13270.1</i> | Symbols:                            | Late embryogenesis abundant (LEA) hydroxyproline-rich                                                     |
| <i>Migut.D01028</i> | LG4 | 5095841 | <i>AT1G52342.1</i> | Symbols:                            | unknown protein; FUNCTIONS IN: molecular_function                                                         |
| <i>Migut.D01029</i> | LG4 | 5098516 | <i>AT2G25735.1</i> | Symbols:                            | unknown protein; Has 31 Blast hits to 31 proteins                                                         |
| <i>Migut.D01030</i> | LG4 | 5101806 | <i>AT1G52343.1</i> | Symbols:                            | unknown protein; BEST Arabidopsis thaliana protein                                                        |
| <i>Migut.D01031</i> | LG4 | 5105215 | <i>AT1G79960.1</i> | Symbols: ATOFP14,<br>OFP14          | ovate family protein 14                                                                                   |
| <i>Migut.D01032</i> | LG4 | 5107000 | <i>AT1G79920.1</i> | Symbols:                            | Heat shock protein 70 (Hsp 70) family protein<br>Alcohol dehydrogenase transcription factor Myb/SANT-like |
| <i>Migut.D01033</i> | LG4 | 5113619 | <i>AT3G24490.1</i> | Symbols:                            |                                                                                                           |
| <i>Migut.D01034</i> | LG4 | 5117164 | <i>AT3G16000.1</i> | Symbols: MFP1                       | MAR binding filament-like protein 1                                                                       |
| <i>Migut.D01035</i> | LG4 | 5121214 | <i>AT3G15990.1</i> | Symbols: SULTR3;4                   | sulfate transporter 3;4                                                                                   |
| <i>Migut.D01036</i> | LG4 | 5137105 | <i>AT1G79990.5</i> | Symbols:                            | structural molecules                                                                                      |
| <i>Migut.D01037</i> | LG4 | 5154848 | <i>AT3G15540.1</i> | Symbols: IAA19, MSG2                | indole-3-acetic acid inducible 19                                                                         |
| <i>Migut.D01038</i> | LG4 | 5159101 | <i>AT4G14550.1</i> | Symbols: IAA14, SLR                 | indole-3-acetic acid inducible 14                                                                         |
| <i>Migut.D01039</i> | LG4 | 5163368 | <i>AT1G80360.1</i> | Symbols:                            | Pyridoxal phosphate (PLP)-dependent transferases                                                          |
| <i>Migut.D01040</i> | LG4 | 5176606 | <i>AT1G52790.1</i> | Symbols:                            | 2-oxoglutarate (2OG) and Fe(II)-dependent oxygenase                                                       |
| <i>Migut.D01041</i> | LG4 | 5178714 | <i>AT1G80310.1</i> | Symbols:                            | sulfate transmembrane transporters                                                                        |
| <i>Migut.D01042</i> | LG4 | 5181125 | <i>AT3G15570.1</i> | Symbols:                            | Phototropic-responsive NPH3 family protein                                                                |
| <i>Migut.D01043</i> | LG4 | 5185117 | <i>AT1G80300.1</i> | Symbols: NTT1, ATNTT1               | nucleotide transporter 1                                                                                  |
| <i>Migut.D01044</i> | LG4 | 5195021 | <i>AT1G52760.1</i> | Symbols: LysoPL2                    | lysophospholipase 2                                                                                       |
| <i>Migut.D01045</i> | LG4 | 5204871 | <i>AT1G15490.1</i> | Symbols:                            | alpha/beta-Hydrolases superfamily protein                                                                 |
| <i>Migut.D01046</i> | LG4 | 5210004 | <i>AT3G15610.1</i> | Symbols:                            | Transducin/WD40 repeat-like superfamily protein                                                           |
| <i>Migut.D01047</i> | LG4 | 5214155 | <i>AT5G19990.1</i> | Symbols: RPT6A, ATSUG1              | regulatory particle triple-A ATPase                                                                       |
| <i>Migut.D01048</i> | LG4 | 5220738 | <i>AT4G32460.2</i> | Symbols:                            | Protein of unknown function, DUF642                                                                       |
| <i>Migut.D01049</i> | LG4 | 5221997 | <i>AT3G27240.1</i> | Symbols:                            | Cytochrome C1 family                                                                                      |
| <i>Migut.D01050</i> | LG4 | 5229339 | <i>AT3G14205.1</i> | Symbols:                            | Phosphoinositide phosphatase family protein                                                               |
| <i>Migut.D01051</i> | LG4 | 5241380 | <i>AT2G26710.1</i> | Symbols: BAS1,<br>CYP734A1, CYP72B1 | Cytochrome P450 superfamily                                                                               |
| <i>Migut.D01052</i> | LG4 | 5245658 | <i>AT1G80230.1</i> | Symbols:                            | Rubredoxin-like superfamily protein                                                                       |
| <i>Migut.D01053</i> | LG4 | 5248276 | <i>AT1G68140.2</i> | Symbols:                            | Protein of unknown function (DUF1644)                                                                     |
| <i>Migut.D01054</i> | LG4 | 5250567 | <i>AT1G52680.1</i> | Symbols:                            | late embryogenesis abundant protein-related / LEA                                                         |
| <i>Migut.D01055</i> | LG4 | 5252117 | <i>AT1G80210.1</i> | Symbols: BRCC36A,<br>AtBRCC36A      | Mov34/MPN/PAD-1 family protein                                                                            |
| <i>Migut.D01056</i> | LG4 | 5259671 | <i>AT1G15410.1</i> | Symbols:                            | aspartate-glutamate racemase family                                                                       |
| <i>Migut.D01057</i> | LG4 | 5264073 | <i>AT1G80180.1</i> | Symbols:                            | unknown protein; FUNCTIONS IN: molecular_function                                                         |
| <i>Migut.D01058</i> | LG4 | 5268609 | <i>AT1G80500.1</i> | Symbols:                            | SNARE-like superfamily protein                                                                            |
| <i>Migut.D01059</i> | LG4 | 5273629 | <i>AT1G80170.1</i> | Symbols:                            | Pectin lyase-like superfamily protein                                                                     |
| <i>Migut.D01060</i> | LG4 | 5277675 |                    |                                     |                                                                                                           |
| <i>Migut.D01061</i> | LG4 | 5279035 | <i>AT2G34160.1</i> | Symbols:                            | Alba DNA/RNA-binding protein                                                                              |
| <i>Migut.D01062</i> | LG4 | 5281606 | <i>AT1G52620.1</i> | Symbols:                            | Pentatricopeptide repeat (PPR) superfamily protein                                                        |
| <i>Migut.D01063</i> | LG4 | 5284467 | <i>AT1G80150.1</i> | Symbols:                            | Tetratricopeptide repeat (TPR)-like superfamily                                                           |

|                     |     |         |                    |                                        |                                                     |
|---------------------|-----|---------|--------------------|----------------------------------------|-----------------------------------------------------|
| <i>Migut.D01064</i> | LG4 | 5288048 | <i>AT5G11170.1</i> | Symbols:                               | DEAD/DEAH box RNA helicase family protein           |
| <i>Migut.D01065</i> | LG4 | 5294043 | <i>AT1G15370.1</i> | Symbols:                               | SNARE-like superfamily protein                      |
| <i>Migut.D01066</i> | LG4 | 5298506 | <i>AT1G52570.1</i> | Symbols: PLDALPHA2                     | phospholipase D alpha 2                             |
| <i>Migut.D01067</i> | LG4 | 5303526 | <i>AT5G12890.1</i> | Symbols:                               | UDP-Glycosyltransferase superfamily protein         |
| <i>Migut.D01068</i> | LG4 | 5305808 | <i>AT5G25360.2</i> | Symbols:                               | unknown protein; FUNCTIONS IN: molecular_function   |
| <i>Migut.D01069</i> | LG4 | 5307658 | <i>AT1G52560.1</i> | Symbols:                               | HSP20-like chaperones superfamily protein           |
| <i>Migut.D01070</i> | LG4 | 5310428 | <i>AT1G80133.1</i> | Symbols:                               | unknown protein; LOCATED IN: endomembrane system;   |
| <i>Migut.D01071</i> | LG4 | 5312577 | <i>AT3G15780.1</i> | Symbols:                               | unknown protein; BEST Arabidopsis thaliana protein  |
| <i>Migut.D01072</i> | LG4 | 5315248 | <i>AT5G20190.1</i> | Symbols:                               | Tetratricopeptide repeat (TPR)-like superfamily     |
| <i>Migut.D01073</i> | LG4 | 5318383 | <i>AT1G15340.1</i> | Symbols: MBD10                         | methyl-CPG-binding domain 10                        |
| <i>Migut.D01074</i> | LG4 | 5321814 | <i>AT1G80080.1</i> | Symbols: TMM, AtRLP17                  | Leucine-rich repeat (LRR) family protein            |
| <i>Migut.D01075</i> | LG4 | 5326523 | <i>AT1G52540.1</i> | Symbols:                               | Protein kinase superfamily protein                  |
| <i>Migut.D01076</i> | LG4 | 5328187 | <i>AT1G52540.1</i> | Symbols:                               | Protein kinase superfamily protein                  |
| <i>Migut.D01077</i> | LG4 | 5332133 | <i>AT4G12560.2</i> | Symbols: CPR30                         | F-box and associated interaction domains-containing |
| <i>Migut.D01078</i> | LG4 | 5340775 | <i>AT1G80490.1</i> | Symbols: TPR1                          | TOPLESS-related 1                                   |
| <i>Migut.D01079</i> | LG4 | 5345874 | <i>AT1G80080.1</i> | Symbols: TMM, AtRLP17                  | Leucine-rich repeat (LRR) family protein            |
| <i>Migut.D01080</i> | LG4 | 5347925 | <i>AT1G80070.1</i> | Symbols: SUS2, EMB33, EMB177, EMB14    | Pre-mRNA-processing-splicing                        |
| <i>Migut.D01081</i> | LG4 | 5351254 | <i>AT1G80070.1</i> | Symbols: SUS2, EMB33, EMB177, EMB14    | Pre-mRNA-processing-splicing                        |
| <i>Migut.D01082</i> | LG4 | 5360168 | <i>AT5G32440.1</i> | Symbols:                               | Ubiquitin system component Cue protein              |
| <i>Migut.D01083</i> | LG4 | 5364396 | <i>AT1G80030.2</i> | Symbols:                               | Molecular chaperone Hsp40/DnaJ family protein       |
| <i>Migut.D01084</i> | LG4 | 5371257 | <i>AT3G42170.1</i> | Symbols:                               | BED zinc finger ;hAT family dimerisation domain     |
| <i>Migut.D01085</i> | LG4 | 5377686 | <i>AT1G15690.1</i> | Symbols: AVP1, ATAVP3, AVP-3, AtVHP1;1 | Inorganic H pyrophosphatase                         |
| <i>Migut.D01086</i> | LG4 | 5383333 | <i>AT2G11890.1</i> | Symbols:                               | adenylate cyclases                                  |
| <i>Migut.D01087</i> | LG4 | 5384535 |                    |                                        |                                                     |
| <i>Migut.D01088</i> | LG4 | 5387921 | <i>AT1G80510.1</i> | Symbols:                               | Transmembrane amino acid transporter family protein |
| <i>Migut.D01089</i> | LG4 | 5391264 | <i>AT1G80520.1</i> | Symbols:                               | Sterile alpha motif (SAM) domain-containing protein |
| <i>Migut.D01090</i> | LG4 | 5392243 | <i>AT3G02645.1</i> | Symbols:                               | Plant protein of unknown function (DUF247)          |
| <i>Migut.D01091</i> | LG4 | 5394805 | <i>AT2G26000.2</i> | Symbols: BRIZ2                         | zinc finger (C3HC4-type RING finger) family         |
| <i>Migut.D01092</i> | LG4 | 5399159 | <i>AT1G80600.1</i> | Symbols: WIN1                          | HOPW1-1-interacting 1                               |
| <i>Migut.D01093</i> | LG4 | 5403688 | <i>AT1G15800.1</i> | Symbols:                               | unknown protein; BEST Arabidopsis thaliana protein  |
| <i>Migut.D01094</i> | LG4 | 5415429 | <i>AT1G28190.1</i> | Symbols:                               | unknown protein; BEST Arabidopsis thaliana protein  |
| <i>Migut.D01095</i> | LG4 | 5416603 | <i>AT2G07560.1</i> | Symbols: AHA6, HA6                     | H(+)-ATPase 6                                       |
| <i>Migut.D01096</i> | LG4 | 5425228 | <i>AT1G15860.2</i> | Symbols:                               | Domain of unknown function (DUF298)                 |
| <i>Migut.D01097</i> | LG4 | 5433664 | <i>AT1G80980.1</i> | Symbols:                               | unknown protein; FUNCTIONS IN: molecular_function   |
| <i>Migut.D01098</i> | LG4 | 5437624 |                    |                                        |                                                     |
| <i>Migut.D01099</i> | LG4 | 5440355 |                    |                                        |                                                     |
| <i>Migut.D01100</i> | LG4 | 5446072 | <i>AT5G25160.1</i> | Symbols: ZFP3                          | zinc finger protein 3                               |
| <i>Migut.D01101</i> | LG4 | 5449471 | <i>AT1G15900.1</i> | Symbols:                               | unknown protein; Has 19 Blast hits to 19 proteins   |
| <i>Migut.D01102</i> | LG4 | 5452465 | <i>AT1G15910.1</i> | Symbols:                               | XH/XS domain-containing protein                     |
| <i>Migut.D01103</i> | LG4 | 5457287 | <i>AT4G00380.1</i> | Symbols:                               | XH/XS domain-containing protein                     |
| <i>Migut.D01104</i> | LG4 | 5467942 | <i>AT3G59140.1</i> | Symbols: ATMMP14, MRP14, ABCC10        | multidrug resistance-associated                     |
| <i>Migut.D01105</i> | LG4 | 5475225 | <i>AT1G10450.1</i> | Symbols: SNL6                          | SIN3-like 6                                         |
| <i>Migut.D01106</i> | LG4 | 5475763 | <i>AT1G80810.2</i> | Symbols:                               | Tudor/PWWP/MBT superfamily protein                  |

|                     |     |         |                    |                                     |                                                                                                                |
|---------------------|-----|---------|--------------------|-------------------------------------|----------------------------------------------------------------------------------------------------------------|
| <i>Migut.D01107</i> | LG4 | 5482247 | <i>AT1G72980.1</i> | Symbols: LBD7                       | LOB domain-containing protein 7                                                                                |
| <i>Migut.D01108</i> | LG4 | 5485333 | <i>AT1G15940.1</i> | Symbols:                            | Tudor/PWWP/MBT superfamily protein                                                                             |
| <i>Migut.D01109</i> | LG4 | 5488935 | <i>AT1G80780.2</i> | Symbols:                            | Polynucleotidyl transferase, ribonuclease H-like<br>hydroxycinnamoyl-CoA shikimate/quinate<br>hydroxycinnamoyl |
| <i>Migut.D01110</i> | LG4 | 5497015 | <i>AT5G48930.1</i> | Symbols: HCT                        | hydroxycinnamoyl-CoA shikimate/quinate<br>hydroxycinnamoyl                                                     |
| <i>Migut.D01111</i> | LG4 | 5507455 | <i>AT5G48930.1</i> | Symbols: HCT                        | hydroxycinnamoyl-CoA shikimate/quinate<br>hydroxycinnamoyl                                                     |
| <i>Migut.D01112</i> | LG4 | 5514208 | <i>AT2G32070.1</i> | Symbols:                            | Polynucleotidyl transferase, ribonuclease H-like                                                               |
| <i>Migut.D01113</i> | LG4 | 5516874 | <i>AT2G32060.2</i> | Symbols:                            | Ribosomal protein L7Ae/L30e/S12e/Gadd45 family                                                                 |
| <i>Migut.D01114</i> | LG4 | 5519092 | <i>AT2G25110.1</i> | Symbols: SDF2, ATSDL,<br>AtSDF2     | stromal cell-derived factor                                                                                    |
| <i>Migut.D01115</i> | LG4 | 5524817 | <i>AT1G11870.1</i> | Symbols: ATSR5, OVA7,<br>SRS        | Seryl-tRNA synthetase                                                                                          |
| <i>Migut.D01116</i> | LG4 | 5528676 | <i>AT4G31880.1</i> | Symbols:                            | LOCATED IN: cytosol, chloroplast; EXPRESSED IN:                                                                |
| <i>Migut.D01117</i> | LG4 | 5535320 | <i>AT1G80810.2</i> | Symbols:                            | Tudor/PWWP/MBT superfamily protein                                                                             |
| <i>Migut.D01118</i> | LG4 | 5538654 | <i>AT5G10950.1</i> | Symbols:                            | Tudor/PWWP/MBT superfamily protein                                                                             |
| <i>Migut.D01119</i> | LG4 | 5541968 | <i>AT4G31880.2</i> | Symbols:                            | LOCATED IN: cytosol; EXPRESSED IN: 24 plant structures;                                                        |
| <i>Migut.D01120</i> | LG4 | 5545671 | <i>AT1G80990.1</i> | Symbols:                            | XH domain-containing protein                                                                                   |
| <i>Migut.D01121</i> | LG4 | 5550422 | <i>AT4G31880.1</i> | Symbols:                            | LOCATED IN: cytosol, chloroplast; EXPRESSED IN:                                                                |
| <i>Migut.D01122</i> | LG4 | 5573198 | <i>AT1G15950.1</i> | Symbols: CCR1, IRX4,<br>ATCCR1      | cinnamoyl coa reductase 1                                                                                      |
| <i>Migut.D01123</i> | LG4 | 5587457 | <i>AT1G80830.1</i> | Symbols: NRAMP1,<br>PMIT1, ATNRAMP1 | natural resistance-associated                                                                                  |
| <i>Migut.D01124</i> | LG4 | 5608053 | <i>AT1G80840.1</i> | Symbols: WRKY40,<br>ATWRKY40        | WRKY DNA-binding protein 40                                                                                    |
| <i>Migut.D01125</i> | LG4 | 5610290 | <i>AT5G57970.2</i> | Symbols:                            | DNA glycosylase superfamily protein                                                                            |
| <i>Migut.D01126</i> | LG4 | 5614956 | <i>AT1G80860.1</i> | Symbols: ATPLMT, PLMT               | phospholipid N-methyltransferase                                                                               |
| <i>Migut.D01127</i> | LG4 | 5622886 | <i>AT1G80870.1</i> | Symbols:                            | Protein kinase superfamily protein                                                                             |
| <i>Migut.D01128</i> | LG4 | 5628219 | <i>AT5G15350.1</i> | Symbols: ENODL17,<br>AtENODL17      | early nodulin-like protein 17                                                                                  |
| <i>Migut.D01129</i> | LG4 | 5633497 | <i>AT1G80920.1</i> | Symbols: J8                         | Chaperone DnaJ-domain superfamily protein                                                                      |
| <i>Migut.D01130</i> | LG4 | 5638129 | <i>AT5G48930.1</i> | Symbols: HCT                        | hydroxycinnamoyl-CoA shikimate/quinate<br>hydroxycinnamoyl                                                     |
| <i>Migut.D01131</i> | LG4 | 5650333 | <i>AT5G48930.1</i> | Symbols: HCT                        | hydroxycinnamoyl-CoA shikimate/quinate<br>hydroxycinnamoyl                                                     |
| <i>Migut.D01132</i> | LG4 | 5658123 | <i>AT5G48930.1</i> | Symbols: HCT                        | hydroxycinnamoyl-CoA shikimate/quinate<br>hydroxycinnamoyl                                                     |
| <i>Migut.D01133</i> | LG4 | 5661991 |                    |                                     |                                                                                                                |
| <i>Migut.D01134</i> | LG4 | 5666850 | <i>AT2G46620.1</i> | Symbols:                            | P-loop containing nucleoside triphosphate hydrolases                                                           |
| <i>Migut.D01135</i> | LG4 | 5668190 | <i>AT5G18420.1</i> | Symbols:                            | unknown protein; FUNCTIONS IN: molecular_function                                                              |
| <i>Migut.D01136</i> | LG4 | 5674234 | <i>AT1G16030.1</i> | Symbols: Hsp70b                     | heat shock protein 70B                                                                                         |
| <i>Migut.D01137</i> | LG4 | 5678836 | <i>AT3G12580.1</i> | Symbols: HSP70,<br>ATHSP70          | heat shock protein 70                                                                                          |
| <i>Migut.D01138</i> | LG4 | 5681474 | <i>AT3G12580.1</i> | Symbols: HSP70,<br>ATHSP70          | heat shock protein 70                                                                                          |
| <i>Migut.D01139</i> | LG4 | 5683714 | <i>AT1G16030.1</i> | Symbols: Hsp70b                     | heat shock protein 70B                                                                                         |
| <i>Migut.D01140</i> | LG4 | 5686780 | <i>AT3G17380.1</i> | Symbols:                            | TRAF-like family protein                                                                                       |
| <i>Migut.D01141</i> | LG4 | 5688095 | <i>AT1G56450.1</i> | Symbols: PBG1                       | 20S proteasome beta subunit G1                                                                                 |
| <i>Migut.D01142</i> | LG4 | 5706960 | <i>AT4G36950.1</i> | Symbols: MAPKKK21                   | mitogen-activated protein kinase kinase                                                                        |
| <i>Migut.D01143</i> | LG4 | 5712302 | <i>AT3G53690.1</i> | Symbols:                            | RING/U-box superfamily protein                                                                                 |
| <i>Migut.D01144</i> | LG4 | 5727766 | <i>AT2G24100.1</i> | Symbols:                            | unknown protein; BEST Arabidopsis thaliana protein                                                             |
| <i>Migut.D01145</i> | LG4 | 5752073 | <i>AT1G79720.1</i> | Symbols:                            | Eukaryotic aspartyl protease family protein                                                                    |

|                     |     |         |                    |                                 |                                                      |
|---------------------|-----|---------|--------------------|---------------------------------|------------------------------------------------------|
| <i>Migut.D01146</i> | LG4 | 5754684 | <i>AT1G79710.1</i> | Symbols:                        | Major facilitator superfamily protein                |
| <i>Migut.D01147</i> | LG4 | 5766175 | <i>AT1G16060.2</i> | Symbols: ADAP                   | ARIA-interacting double AP2 domain protein           |
| <i>Migut.D01148</i> | LG4 | 5769814 | <i>AT1G16080.1</i> | Symbols:                        | unknown protein; LOCATED IN: apoplast, chloroplast   |
| <i>Migut.D01149</i> | LG4 | 5772217 | <i>AT1G16170.1</i> | Symbols:                        | unknown protein; FUNCTIONS IN: molecular_function    |
| <i>Migut.D01150</i> | LG4 | 5776648 | <i>AT1G79650.1</i> | Symbols: RAD23, RAD23B          | Rad23 UV excision repair protein family              |
| <i>Migut.D01151</i> | LG4 | 5782593 | <i>AT5G59850.1</i> | Symbols:                        | Ribosomal protein S8 family protein                  |
| <i>Migut.D01152</i> | LG4 | 5792572 | <i>AT5G57800.1</i> | Symbols: FLP1, YRE, CER3, WAX2  | Fatty acid hydroxylase superfamily                   |
| <i>Migut.D01153</i> | LG4 | 5799558 | <i>AT2G24530.1</i> | Symbols:                        | unknown protein; BEST Arabidopsis thaliana protein   |
| <i>Migut.D01154</i> | LG4 | 5803430 | <i>AT5G43150.1</i> | Symbols:                        | unknown protein; FUNCTIONS IN: molecular_function    |
| <i>Migut.D01155</i> | LG4 | 5812147 | <i>AT3G14250.1</i> | Symbols:                        | RING/U-box superfamily protein                       |
| <i>Migut.D01156</i> | LG4 | 5816755 | <i>AT4G30080.1</i> | Symbols: ARF16                  | auxin response factor 16                             |
| <i>Migut.D01157</i> | LG4 | 5822017 | <i>AT3G53690.1</i> | Symbols:                        | RING/U-box superfamily protein                       |
| <i>Migut.D01158</i> | LG4 | 5824554 | <i>AT3G14250.1</i> | Symbols:                        | RING/U-box superfamily protein                       |
| <i>Migut.D01159</i> | LG4 | 5827087 | <i>AT3G14250.1</i> | Symbols:                        | RING/U-box superfamily protein                       |
| <i>Migut.D01160</i> | LG4 | 5829857 | <i>AT3G53690.1</i> | Symbols:                        | RING/U-box superfamily protein                       |
| <i>Migut.D01161</i> | LG4 | 5850987 | <i>AT3G14250.1</i> | Symbols:                        | RING/U-box superfamily protein                       |
| <i>Migut.D01162</i> | LG4 | 5853537 | <i>AT3G21240.1</i> | Symbols: 4CL2, AT4CL2           | 4-coumarate:CoA ligase 2                             |
| <i>Migut.D01163</i> | LG4 | 5863515 | <i>AT5G51060.1</i> | Symbols: RHD2, ATRBOHC, RBOHC   | NADPH/respiratory burst oxidase                      |
| <i>Migut.D01164</i> | LG4 | 5870213 | <i>AT1G65780.1</i> | Symbols:                        | P-loop containing nucleoside triphosphate hydrolases |
| <i>Migut.D01165</i> | LG4 | 5882976 | <i>ATCG00530.1</i> | Symbols: YCF10                  | CemA-like proton extrusion protein-related           |
| <i>Migut.D01166</i> | LG4 | 5893225 | <i>AT5G51060.1</i> | Symbols: RHD2, ATRBOHC, RBOHC   | NADPH/respiratory burst oxidase                      |
| <i>Migut.D01167</i> | LG4 | 5900775 | <i>AT5G07380.2</i> | Symbols:                        | unknown protein; Has 84 Blast hits to 81 proteins    |
| <i>Migut.D01168</i> | LG4 | 5908621 | <i>AT5G61750.1</i> | Symbols:                        | RmlC-like cupins superfamily protein                 |
| <i>Migut.D01169</i> | LG4 | 5918557 | <i>AT5G07350.2</i> | Symbols: Tudor1, AtTudor1, TSN1 | TUDOR-SN protein 1                                   |
| <i>Migut.D01170</i> | LG4 | 5945023 | <i>AT5G61790.1</i> | Symbols: CNX1, ATCNX1           | calnexin 1                                           |
| <i>Migut.D01171</i> | LG4 | 5947009 | <i>AT5G61790.1</i> | Symbols: CNX1, ATCNX1           | calnexin 1                                           |
| <i>Migut.D01172</i> | LG4 | 5949115 | <i>AT5G61820.1</i> | Symbols:                        | FUNCTIONS IN: molecular_function unknown; INVOLVED   |
| <i>Migut.D01173</i> | LG4 | 5955077 | <i>AT5G51030.1</i> | Symbols:                        | NAD(P)-binding Rossmann-fold superfamily protein     |
| <i>Migut.D01174</i> | LG4 | 5958648 | <i>AT5G35450.1</i> | Symbols:                        | Disease resistance protein (CC-NBS-LRR class) family |
| <i>Migut.D01175</i> | LG4 | 5961926 | <i>AT5G61840.1</i> | Symbols: GUT1                   | Exostosin family protein                             |
| <i>Migut.D01176</i> | LG4 | 5967886 | <i>AT1G01630.1</i> | Symbols:                        | Sec14p-like phosphatidylinositol transfer family     |
| <i>Migut.D01177</i> | LG4 | 5971979 | <i>AT1G01630.1</i> | Symbols:                        | Sec14p-like phosphatidylinositol transfer family     |
| <i>Migut.D01178</i> | LG4 | 5976045 | <i>AT1G01630.1</i> | Symbols:                        | Sec14p-like phosphatidylinositol transfer family     |
| <i>Migut.D01179</i> | LG4 | 5988430 | <i>AT5G61850.1</i> | Symbols: LFY, LFY3              | floral meristem identity control protein             |
| <i>Migut.D01180</i> | LG4 | 5991129 | <i>AT1G29880.1</i> | Symbols:                        | glycyl-tRNA synthetase / glycine--tRNA ligase        |
| <i>Migut.D01181</i> | LG4 | 5996689 | <i>AT5G61865.1</i> | Symbols:                        | unknown protein; Has 30201 Blast hits to 17322       |
| <i>Migut.D01182</i> | LG4 | 6005066 | <i>AT5G61880.2</i> | Symbols:                        | Protein Transporter, Pam16                           |
| <i>Migut.D01183</i> | LG4 | 6008029 | <i>AT5G61900.3</i> | Symbols: BON1, CPN1, BON        | Calcium-dependent phospholipid-binding               |
| <i>Migut.D01184</i> | LG4 | 6026762 | <i>AT5G50930.1</i> | Symbols:                        | Histone superfamily protein                          |
| <i>Migut.D01185</i> | LG4 | 6034922 | <i>AT2G33550.1</i> | Symbols:                        | Homeodomain-like superfamily protein                 |
| <i>Migut.D01186</i> | LG4 | 6035724 | <i>AT4G25080.4</i> | Symbols: CHLM                   | magnesium-protoporphyrin IX methyltransferase        |
| <i>Migut.D01187</i> | LG4 | 6041118 | <i>AT1G54390.1</i> | Symbols: ING2                   | PHD finger protein-related                           |

|                     |     |         |                    |                                                |                                                       |
|---------------------|-----|---------|--------------------|------------------------------------------------|-------------------------------------------------------|
| <i>Migut.D01188</i> | LG4 | 6054080 | <i>AT5G13980.2</i> | Symbols:                                       | Glycosyl hydrolase family 38 protein                  |
| <i>Migut.D01189</i> | LG4 | 6065374 | <i>AT5G40820.1</i> | Symbols: ATRAD3, ATR, ATATR                    | Ataxia telangiectasia-mutated                         |
| <i>Migut.D01190</i> | LG4 | 6070215 | <i>AT5G62000.3</i> | Symbols: ARF2, ARF1-BP, HSS, ORE14             | auxin response factor                                 |
| <i>Migut.D01191</i> | LG4 | 6087161 | <i>AT1G12860.1</i> | Symbols: SCRM2, ICE2                           | basic helix-loop-helix (bHLH) DNA-binding             |
| <i>Migut.D01192</i> | LG4 | 6101934 | <i>AT5G50920.1</i> | Symbols: CLPC, ATHSP93-V, HSP93-V, DCA1, CLPC1 | CLPC homologue                                        |
| <i>Migut.D01193</i> | LG4 | 6108038 | <i>AT1G56690.1</i> | Symbols:                                       | Pentatricopeptide repeat (PPR) superfamily protein    |
| <i>Migut.D01194</i> | LG4 | 6114136 | <i>AT5G37600.1</i> | Symbols: ATGSR1, GLN1;1, GSR 1, ATGLN1;1       | glutamine synthase                                    |
| <i>Migut.D01195</i> | LG4 | 6120196 | <i>AT5G42390.1</i> | Symbols:                                       | Insulinase (Peptidase family M16) family protein      |
| <i>Migut.D01196</i> | LG4 | 6131373 | <i>AT3G44400.2</i> | Symbols:                                       | Disease resistance protein (TIR-NBS-LRR class)        |
| <i>Migut.D01197</i> | LG4 | 6161097 | <i>AT2G01670.1</i> | Symbols: atnudt17, NUDT17                      | nudix hydrolase homolog 17                            |
| <i>Migut.D01198</i> | LG4 | 6167744 | <i>AT4G37110.1</i> | Symbols:                                       | Zinc-finger domain of monoamine-oxidase A repressor   |
| <i>Migut.D01199</i> | LG4 | 6170175 | <i>AT3G17830.1</i> | Symbols:                                       | Molecular chaperone Hsp40/DnaJ family protein         |
| <i>Migut.D01200</i> | LG4 | 6196047 | <i>AT3G17850.1</i> | Symbols:                                       | Protein kinase superfamily protein                    |
| <i>Migut.D01201</i> | LG4 | 6198190 | <i>AT3G17850.1</i> | Symbols:                                       | Protein kinase superfamily protein                    |
| <i>Migut.D01202</i> | LG4 | 6206213 | <i>AT3G17850.1</i> | Symbols:                                       | Protein kinase superfamily protein                    |
| <i>Migut.D01203</i> | LG4 | 6230342 | <i>AT1G68130.1</i> | Symbols: AtIDD14, IDD14                        | indeterminate(ID)-domain 14                           |
| <i>Migut.D01204</i> | LG4 | 6238243 | <i>AT4G18395.1</i> | Symbols:                                       | unknown protein; Has 30201 Blast hits to 17322        |
| <i>Migut.D01205</i> | LG4 | 6243277 | <i>AT1G68120.1</i> | Symbols: BPC3, ATBPC3                          | basic pentacysteine 3                                 |
| <i>Migut.D01206</i> | LG4 | 6248575 | <i>AT3G43810.1</i> | Symbols: CAM7                                  | calmodulin 7                                          |
| <i>Migut.D01207</i> | LG4 | 6252425 | <i>AT3G17770.1</i> | Symbols:                                       | Dihydroxyacetone kinase                               |
| <i>Migut.D01208</i> | LG4 | 6265349 | <i>AT1G73480.1</i> | Symbols:                                       | alpha/beta-Hydrolases superfamily protein             |
| <i>Migut.D01209</i> | LG4 | 6273027 | <i>AT3G17790.1</i> | Symbols: ATACP5, ATPAP17, PAP17                | purple acid phosphatase 17                            |
| <i>Migut.D01210</i> | LG4 | 6278451 | <i>AT2G02050.1</i> | Symbols:                                       | NADH-ubiquinone oxidoreductase B18 subunit, putative  |
| <i>Migut.D01211</i> | LG4 | 6279864 | <i>AT4G32880.1</i> | Symbols: ATHB-8, ATHB8, HB-8                   | homeobox gene 8                                       |
| <i>Migut.D01212</i> | LG4 | 6282326 | <i>AT1G25230.1</i> | Symbols:                                       | Calcineurin-like metallo-phosphoesterase superfamily  |
| <i>Migut.D01213</i> | LG4 | 6284324 | <i>AT1G48450.1</i> | Symbols:                                       | Protein of unknown function (DUF760)                  |
| <i>Migut.D01214</i> | LG4 | 6288078 | <i>AT1G68660.1</i> | Symbols:                                       | Ribosomal protein L12/ ATP-dependent Clp protease     |
| <i>Migut.D01215</i> | LG4 | 6295966 | <i>AT1G73820.1</i> | Symbols:                                       | Ssu72-like family protein                             |
| <i>Migut.D01216</i> | LG4 | 6298464 | <i>AT2G39260.1</i> | Symbols:                                       | binding;RNA binding                                   |
| <i>Migut.D01217</i> | LG4 | 6311996 | <i>AT3G17780.1</i> | Symbols:                                       | FUNCTIONS IN: molecular_function unknown; INVOLVED    |
| <i>Migut.D01218</i> | LG4 | 6325804 | <i>AT3G02850.1</i> | Symbols: SKOR                                  | STELAR K+ outward rectifier                           |
| <i>Migut.D01219</i> | LG4 | 6338501 | <i>AT3G17810.1</i> | Symbols: PYD1                                  | pyrimidine 1                                          |
| <i>Migut.D01220</i> | LG4 | 6350515 | <i>AT1G14760.2</i> | Symbols: KNATM                                 | KNOX Arabidopsis thaliana meinox                      |
| <i>Migut.D01221</i> | LG4 | 6352677 | <i>AT1G10170.1</i> | Symbols: ATNFXL1, NFXL1                        | NF-X-like 1                                           |
| <i>Migut.D01222</i> | LG4 | 6359437 | <i>AT4G32640.2</i> | Symbols:                                       | Sec23/Sec24 protein transport family protein          |
| <i>Migut.D01223</i> | LG4 | 6380102 | <i>AT5G14040.1</i> | Symbols: PHT3;1                                | phosphate transporter 3;1                             |
| <i>Migut.D01224</i> | LG4 | 6387592 | <i>AT5G50915.2</i> | Symbols:                                       | basic helix-loop-helix (bHLH) DNA-binding superfamily |
| <i>Migut.D01225</i> | LG4 | 6401388 | <i>AT1G12840.1</i> | Symbols: DET3, ATVHA-C                         | vacuolar ATP synthase subunit C (VATC)                |
| <i>Migut.D01226</i> | LG4 | 6410011 | <i>AT3G48820.1</i> | Symbols:                                       | Glycosyltransferase family 29 (sialyltransferase)     |
| <i>Migut.D01227</i> | LG4 | 6416494 | <i>AT5G23680.1</i> | Symbols:                                       | Sterile alpha motif (SAM) domain-containing protein   |
| <i>Migut.D01228</i> | LG4 | 6418267 | <i>AT5G23670.2</i> | Symbols: LCB2                                  | long chain base2                                      |

|                     |     |         |                    |                              |                                                      |
|---------------------|-----|---------|--------------------|------------------------------|------------------------------------------------------|
| <i>Migut.D01229</i> | LG4 | 6426715 | <i>AT5G14030.4</i> | Symbols:                     | translocon-associated protein beta (TRAPB) family    |
| <i>Migut.D01230</i> | LG4 | 6470870 | <i>AT3G17980.1</i> | Symbols:                     | Calcium-dependent lipid-binding (CaLB domain) family |
| <i>Migut.D01231</i> | LG4 | 6484403 | <i>AT3G27160.1</i> | Symbols: GHS1                | Ribosomal protein S21 family protein                 |
| <i>Migut.D01232</i> | LG4 | 6487927 | <i>AT1G66350.1</i> | Symbols: RGL1, RGL           | RGA-like 1                                           |
| <i>Migut.D01233</i> | LG4 | 6493777 | <i>AT3G26040.1</i> | Symbols:                     | HXXXD-type acyl-transferase family protein           |
| <i>Migut.D01234</i> | LG4 | 6506777 | <i>AT5G50350.1</i> | Symbols:                     | unknown protein; FUNCTIONS IN: molecular_function    |
| <i>Migut.D01235</i> | LG4 | 6510112 | <i>AT5G63320.3</i> | Symbols: NPX1                | nuclear protein X1                                   |
| <i>Migut.D01236</i> | LG4 | 6535407 | <i>AT5G26760.1</i> | Symbols:                     | unknown protein; Has 30201 Blast hits to 17322       |
| <i>Migut.D01237</i> | LG4 | 6536162 | <i>AT4G01400.3</i> | Symbols:                     | FUNCTIONS IN: molecular_function unknown; INVOLVED   |
| <i>Migut.D01238</i> | LG4 | 6599093 | <i>AT5G50360.1</i> | Symbols:                     | unknown protein; BEST Arabidopsis thaliana protein   |
| <i>Migut.D01239</i> | LG4 | 6610909 | <i>AT5G63380.1</i> | Symbols:                     | AMP-dependent synthetase and ligase family protein   |
| <i>Migut.D01240</i> | LG4 | 6623895 | <i>AT5G20090.2</i> | Symbols:                     | Uncharacterised protein family (UPF0041)             |
| <i>Migut.D01476</i> | LG4 | 8910964 | <i>AT5G60440.1</i> | Symbols: AGL62               | AGAMOUS-like 62                                      |
| <i>Migut.D01477</i> | LG4 | 8950529 | <i>AT1G68490.1</i> | Symbols:                     | unknown protein; FUNCTIONS IN: molecular_function    |
| <i>Migut.D01478</i> | LG4 | 8967522 | <i>AT3G18400.1</i> | Symbols: anac058,<br>NAC058  | NAC domain containing protein 58                     |
| <i>Migut.D01479</i> | LG4 | 8981717 | <i>AT1G73980.1</i> | Symbols:                     | Phosphoribulokinase / Uridine kinase family          |
| <i>Migut.D01480</i> | LG4 | 9006674 | <i>AT1G73990.1</i> | Symbols: SPPA, SPPA1         | signal peptide peptidase                             |
| <i>Migut.D01481</i> | LG4 | 9041392 | <i>AT1G73990.1</i> | Symbols: SPPA, SPPA1         | signal peptide peptidase                             |
| <i>Migut.D01482</i> | LG4 | 9058184 | <i>AT5G35520.1</i> | Symbols: MIS12,<br>ATMIS12   | minichromosome instability 12 (mis12)-like           |
| <i>Migut.D01483</i> | LG4 | 9063712 | <i>AT3G46730.1</i> | Symbols:                     | NB-ARC domain-containing disease resistance protein  |
| <i>Migut.D01484</i> | LG4 | 9070246 | <i>AT1G53350.1</i> | Symbols:                     | Disease resistance protein (CC-NBS-LRR class) family |
| <i>Migut.D01485</i> | LG4 | 9084609 | <i>AT1G18490.1</i> | Symbols:                     | Protein of unknown function (DUF1637)                |
| <i>Migut.D01486</i> | LG4 | 9091259 | <i>AT3G46530.1</i> | Symbols: RPP13               | NB-ARC domain-containing disease resistance          |
| <i>Migut.D01487</i> | LG4 | 9104366 | <i>AT2G23810.1</i> | Symbols: TET8                | tetraspanin8                                         |
| <i>Migut.D01488</i> | LG4 | 9106936 | <i>AT5G23040.1</i> | Symbols: CDF1                | Protein of unknown function (DUF3353)                |
| <i>Migut.D01489</i> | LG4 | 9120501 | <i>AT5G23050.1</i> | Symbols: AAE17               | acyl-activating enzyme 17                            |
| <i>Migut.D01490</i> | LG4 | 9133139 | <i>AT5G23060.1</i> | Symbols: CaS                 | calcium sensing receptor                             |
| <i>Migut.D01491</i> | LG4 | 9142470 | <i>AT5G61070.1</i> | Symbols: HDA18,<br>ATHDA18   | histone deacetylase of the RPD3/HDA1                 |
| <i>Migut.D01492</i> | LG4 | 9145176 | <i>AT2G22180.1</i> | Symbols:                     | hydroxyproline-rich glycoprotein family protein      |
| <i>Migut.D01493</i> | LG4 | 9194570 | <i>AT3G42660.1</i> | Symbols:                     | transducin family protein / WD-40 repeat family      |
| <i>Migut.D01494</i> | LG4 | 9208307 | <i>AT3G05670.1</i> | Symbols:                     | RING/U-box protein                                   |
| <i>Migut.D01495</i> | LG4 | 9261278 | <i>AT5G27100.1</i> | Symbols: ATGLR2.1,<br>GLR2.1 | glutamate receptor 2.1                               |
| <i>Migut.D01496</i> | LG4 | 9274621 | <i>AT5G57280.1</i> | Symbols:                     | S-adenosyl-L-methionine-dependent methyltransferases |
| <i>Migut.D01497</i> | LG4 | 9319705 | <i>AT4G38090.1</i> | Symbols:                     | Ribosomal protein S5 domain 2-like superfamily       |
| <i>Migut.D01498</i> | LG4 | 9320201 | <i>ATCG00900.1</i> | Symbols: RPS7.1, RPS7        | Ribosomal protein S7p/S5e family protein             |
| <i>Migut.D01499</i> | LG4 | 9320910 | <i>ATCG01250.1</i> | Symbols: NDHB.2              | NADH-Ubiquinone/plastoquinone (complex I)            |
| <i>Migut.D01500</i> | LG4 | 9322926 | <i>AT5G35450.1</i> | Symbols:                     | Disease resistance protein (CC-NBS-LRR class) family |
| <i>Migut.D01501</i> | LG4 | 9339663 | <i>AT3G17940.1</i> | Symbols:                     | Galactose mutarotase-like superfamily protein        |
| <i>Migut.D01502</i> | LG4 | 9342905 | <i>AT1G50180.1</i> | Symbols:                     | NB-ARC domain-containing disease resistance protein  |
| <i>Migut.D01503</i> | LG4 | 9377518 | <i>AT1G50180.1</i> | Symbols:                     | NB-ARC domain-containing disease resistance protein  |
| <i>Migut.D01504</i> | LG4 | 9380146 | <i>AT1G48590.1</i> | Symbols:                     | Calcium-dependent lipid-binding (CaLB domain) family |
| <i>Migut.D01505</i> | LG4 | 9384697 | <i>AT1G48590.1</i> | Symbols:                     | Calcium-dependent lipid-binding (CaLB domain) family |
| <i>Migut.D01506</i> | LG4 | 9416554 | <i>AT3G17980.1</i> | Symbols:                     | Calcium-dependent lipid-binding (CaLB domain) family |
| <i>Migut.D01507</i> | LG4 | 9417732 | <i>AT5G43470.2</i> | Symbols: RPP8, HRT,          | Disease resistance protein (CC-NBS-LRR               |

|                     |      |         |                    | RCY1                               |                                                                |
|---------------------|------|---------|--------------------|------------------------------------|----------------------------------------------------------------|
| <i>Migut.D01508</i> | LG4  | 9427929 | <i>AT3G17980.1</i> | Symbols:                           | Calcium-dependent lipid-binding (CaLB domain) family           |
| <i>Migut.D01509</i> | LG4  | 9433179 | <i>AT1G48590.1</i> | Symbols:                           | Calcium-dependent lipid-binding (CaLB domain) family           |
| <i>Migut.D01510</i> | LG4  | 9433822 | <i>AT3G46530.1</i> | Symbols: RPP13                     | NB-ARC domain-containing disease resistance                    |
| <i>Migut.D01511</i> | LG4  | 9439810 | <i>AT5G37740.1</i> | Symbols:                           | Calcium-dependent lipid-binding (CaLB domain) family           |
| <i>Migut.D01512</i> | LG4  | 9441887 | <i>AT3G17980.1</i> | Symbols:                           | Calcium-dependent lipid-binding (CaLB domain) family           |
| <i>Migut.D01513</i> | LG4  | 9442581 | <i>AT3G46530.1</i> | Symbols: RPP13                     | NB-ARC domain-containing disease resistance                    |
| <i>Migut.D01514</i> | LG4  | 9459811 | <i>AT1G48590.1</i> | Symbols:                           | Calcium-dependent lipid-binding (CaLB domain) family           |
| <i>Migut.D01515</i> | LG4  | 9488815 | <i>AT1G77450.1</i> | Symbols: anac032,<br>NAC032        | NAC domain containing protein 32                               |
| <i>Migut.K00067</i> | LG11 | 329041  | <i>AT3G20860.1</i> | Symbols: ATNEK5, NEK5              | NIMA-related kinase 5                                          |
| <i>Migut.K00068</i> | LG11 | 333394  | <i>AT2G41905.1</i> | Symbols:                           | BEST Arabidopsis thaliana protein match is:<br>arabinogalactan |
| <i>Migut.K00069</i> | LG11 | 335395  | <i>AT3G18140.1</i> | Symbols:                           | Transducin/WD40 repeat-like superfamily protein                |
| <i>Migut.K00070</i> | LG11 | 339280  | <i>AT1G20580.1</i> | Symbols:                           | Small nuclear ribonucleoprotein family protein                 |
| <i>Migut.K00071</i> | LG11 | 341331  | <i>AT3G57650.1</i> | Symbols: LPAT2                     | lysophosphatidyl acyltransferase 2                             |
| <i>Migut.K00072</i> | LG11 | 347040  | <i>AT3G57610.1</i> | Symbols: ADSS                      | adenylosuccinate synthase                                      |
| <i>Migut.K00073</i> | LG11 | 350212  | <i>AT2G05320.1</i> | Symbols:                           | beta-1,2-N-acetylglucosaminyltransferase II                    |
| <i>Migut.K00074</i> | LG11 | 352379  | <i>AT3G18830.1</i> | Symbols: ATPLT5, PMT5,<br>ATPMT5   | polyol/monosaccharide transporter                              |
| <i>Migut.K00075</i> | LG11 | 354443  | <i>AT1G78995.1</i> | Symbols:                           | unknown protein; Has 30201 Blast hits to 17322                 |
| <i>Migut.K00076</i> | LG11 | 356868  | <i>AT5G13960.1</i> | Symbols: SUVH4, KYP,<br>SDG33      | SU(VAR)3-9 homolog 4                                           |
| <i>Migut.K00077</i> | LG11 | 364138  | <i>AT3G57550.2</i> | Symbols: AGK2, GK-2                | guanylate kinase                                               |
| <i>Migut.K00078</i> | LG11 | 377047  | <i>AT3G57530.1</i> | Symbols: CPK32,<br>ATCPK32, CDPK32 | calcium-dependent protein                                      |
| <i>Migut.K00079</i> | LG11 | 381633  | <i>AT3G57520.1</i> | Symbols: AtSIP2, SIP2              | seed imbibition 2                                              |
| <i>Migut.K00080</i> | LG11 | 385214  | <i>AT2G02980.1</i> | Symbols: OTP85                     | Pentatricopeptide repeat (PPR) superfamily                     |
| <i>Migut.K00081</i> | LG11 | 388634  | <i>AT2G41850.1</i> | Symbols: PGAZAT,<br>ADPG2          | polygalacturonase abscission zone                              |
| <i>Migut.K00082</i> | LG11 | 391714  | <i>AT1G48320.1</i> | Symbols:                           | Thioesterase superfamily protein                               |
| <i>Migut.K00083</i> | LG11 | 394759  | <i>AT3G57500.1</i> | Symbols:                           | unknown protein; BEST Arabidopsis thaliana protein             |
| <i>Migut.K00084</i> | LG11 | 396975  | <i>AT2G41830.1</i> | Symbols:                           | Uncharacterized protein                                        |
| <i>Migut.K00085</i> | LG11 | 404024  | <i>AT1G01170.2</i> | Symbols:                           | Protein of unknown function (DUF1138)                          |
| <i>Migut.K00086</i> | LG11 | 405966  | <i>AT2G41820.1</i> | Symbols:                           | Leucine-rich repeat protein kinase family protein              |
| <i>Migut.K00087</i> | LG11 | 413226  | <i>AT2G41810.1</i> | Symbols:                           | Protein of unknown function, DUF642                            |
| <i>Migut.K00088</i> | LG11 | 417812  | <i>AT1G48020.1</i> | Symbols: PME11,<br>ATPME11         | pectin methylesterase inhibitor 1                              |
| <i>Migut.K00089</i> | LG11 | 418796  | <i>AT3G57440.1</i> | Symbols:                           | unknown protein; Has 31 Blast hits to 31 proteins              |
| <i>Migut.K00090</i> | LG11 | 422507  | <i>AT1G60080.1</i> | Symbols:                           | 3'-5'-exoribonuclease family protein                           |
| <i>Migut.K00091</i> | LG11 | 429009  | <i>AT2G41740.1</i> | Symbols: VLN2, ATVLN2              | villin 2                                                       |
| <i>Migut.K00092</i> | LG11 | 436133  | <i>AT2G41680.1</i> | Symbols: NTRC                      | NADPH-dependent thioredoxin reductase C                        |
| <i>Migut.K00093</i> | LG11 | 439109  | <i>AT2G41670.1</i> | Symbols:                           | P-loop containing nucleoside triphosphate hydrolases           |
| <i>Migut.K00094</i> | LG11 | 448936  | <i>AT2G41660.1</i> | Symbols: MIZ1                      | Protein of unknown function, DUF617                            |
| <i>Migut.K00095</i> | LG11 | 452501  | <i>AT3G10330.1</i> | Symbols:                           | Cyclin-like family protein                                     |
| <i>Migut.K00096</i> | LG11 | 455677  | <i>AT2G15490.1</i> | Symbols: UGT73B4                   | UDP-glycosyltransferase 73B4                                   |
| <i>Migut.K00097</i> | LG11 | 458552  | <i>AT2G15490.1</i> | Symbols: UGT73B4                   | UDP-glycosyltransferase 73B4                                   |
| <i>Migut.K00098</i> | LG11 | 460287  | <i>AT3G57360.1</i> | Symbols:                           | unknown protein; BEST Arabidopsis thaliana protein             |
| <i>Migut.K00099</i> | LG11 | 461502  | <i>AT2G15490.3</i> | Symbols: UGT73B4                   | UDP-glycosyltransferase 73B4                                   |



|                     |      |        |                    |                                                              |                                                          |
|---------------------|------|--------|--------------------|--------------------------------------------------------------|----------------------------------------------------------|
| <i>Migut.K00100</i> | LG11 | 464577 | <i>AT2G15490.3</i> | Symbols: UGT73B4                                             | UDP-glycosyltransferase 73B4                             |
| <i>Migut.K00101</i> | LG11 | 469237 | <i>AT2G41620.1</i> | Symbols:                                                     | Nucleoporin interacting component (Nup93/Nic96-like)     |
| <i>Migut.K00102</i> | LG11 | 475858 | <i>AT3G57300.1</i> | Symbols: INO80,<br>ATINO80                                   | INO80 ortholog                                           |
| <i>Migut.K00103</i> | LG11 | 485804 | <i>AT4G20990.1</i> | Symbols: ATACA4, ACA4                                        | alpha carbonic anhydrase 4                               |
| <i>Migut.K00104</i> | LG11 | 488906 | <i>AT3G57290.1</i> | Symbols: EIF3E, TIF3E1,<br>ATEIF3E-1, INT-6, ATINT6,<br>INT6 | eukaryotic                                               |
| <i>Migut.K00105</i> | LG11 | 492511 | <i>AT2G41510.1</i> | Symbols: ATCKX1, CKX1                                        | cytokinin oxidase/dehydrogenase 1                        |
| <i>Migut.K00106</i> | LG11 | 502393 | <i>AT3G57280.1</i> | Symbols:                                                     | Transmembrane proteins 14C                               |
| <i>Migut.K00107</i> | LG11 | 505388 | <i>AT3G57270.1</i> | Symbols: BG1                                                 | beta-1,3-glucanase 1                                     |
| <i>Migut.K00108</i> | LG11 | 508131 | <i>AT3G10210.1</i> | Symbols:                                                     | SEC14 cytosolic factor family protein / phosphoglyceride |
| <i>Migut.K00109</i> | LG11 | 509655 | <i>AT5G04080.1</i> | Symbols:                                                     | unknown protein; FUNCTIONS IN: molecular_function        |
| <i>Migut.K00110</i> | LG11 | 511220 | <i>AT5G04060.1</i> | Symbols:                                                     | S-adenosyl-L-methionine-dependent methyltransferases     |
| <i>Migut.K00111</i> | LG11 | 524513 | <i>AT3G10190.1</i> | Symbols:                                                     | Calcium-binding EF-hand family protein                   |
| <i>Migut.K00112</i> | LG11 | 526560 | <i>AT5G04040.1</i> | Symbols: SDP1                                                | Patatin-like phospholipase family protein                |
| <i>Migut.K00113</i> | LG11 | 529744 | <i>AT3G57170.1</i> | Symbols:                                                     | N-acetylglucosaminyl transferase component family        |
| <i>Migut.K00114</i> | LG11 | 535457 | <i>AT2G41430.5</i> | Symbols: ERD15                                               | dehydration-induced protein (ERD15)                      |
| <i>Migut.K00115</i> | LG11 | 538064 | <i>AT5G04010.1</i> | Symbols:                                                     | F-box family protein                                     |
| <i>Migut.K00116</i> | LG11 | 539275 | <i>AT3G19360.1</i> | Symbols:                                                     | Zinc finger (CCCH-type) family protein                   |
| <i>Migut.K00117</i> | LG11 | 541798 | <i>AT2G41460.1</i> | Symbols: ARP                                                 | apurinic endonuclease-redox protein                      |
| <i>Migut.K00118</i> | LG11 | 545019 | <i>AT5G40010.1</i> | Symbols: AATP1                                               | AAA-ATPase 1                                             |
| <i>Migut.K00119</i> | LG11 | 547230 | <i>AT2G41490.1</i> | Symbols: GPT                                                 | UDP-glnac-adolichol phosphate glcnac-1-p-transferase     |
| <i>Migut.K00120</i> | LG11 | 552882 | <i>AT4G14750.1</i> | Symbols: IQD19                                               | IQ-domain 19                                             |
| <i>Migut.K00121</i> | LG11 | 555345 | <i>AT3G50140.1</i> | Symbols:                                                     | Plant protein of unknown function (DUF247)               |
| <i>Migut.K00122</i> | LG11 | 557077 | <i>AT5G66520.1</i> | Symbols:                                                     | Tetratricopeptide repeat (TPR)-like superfamily          |
| <i>Migut.K00123</i> | LG11 | 559157 | <i>AT5G14800.1</i> | Symbols: P5CR, AT-P5R,<br>AT-P5C1, EMB2772                   | pyrroline-5- carboxylate                                 |
| <i>Migut.K00124</i> | LG11 | 563668 | <i>AT2G41380.1</i> | Symbols:                                                     | S-adenosyl-L-methionine-dependent methyltransferases     |
| <i>Migut.K00125</i> | LG11 | 564733 | <i>AT2G41350.1</i> | Symbols:                                                     | unknown protein; BEST Arabidopsis thaliana protein       |
| <i>Migut.K00126</i> | LG11 | 567150 | <i>AT2G04865.1</i> | Symbols:                                                     | Aminotransferase-like, plant mobile domain family        |
| <i>Migut.K00127</i> | LG11 | 571990 | <i>AT3G14470.1</i> | Symbols:                                                     | NB-ARC domain-containing disease resistance protein      |
| <i>Migut.K00128</i> | LG11 | 574656 | <i>AT3G57062.2</i> | Symbols:                                                     | unknown protein; FUNCTIONS IN: molecular_function        |
| <i>Migut.K00129</i> | LG11 | 576221 | <i>AT3G57050.1</i> | Symbols: CBL                                                 | cystathionine beta-lyase                                 |
| <i>Migut.K00130</i> | LG11 | 579475 | <i>AT3G10250.2</i> | Symbols:                                                     | Plant protein 1589 of unknown function                   |
| <i>Migut.K00131</i> | LG11 | 583527 | <i>AT3G57040.1</i> | Symbols: ARR9, ATRR4                                         | response regulator 9                                     |
| <i>Migut.K00132</i> | LG11 | 590902 | <i>AT5G19400.2</i> | Symbols: SMG7                                                | Telomerase activating protein Est1                       |
| <i>Migut.K00133</i> | LG11 | 597163 | <i>AT2G41200.1</i> | Symbols:                                                     | unknown protein; Has 26 Blast hits to 26 proteins        |
| <i>Migut.K00134</i> | LG11 | 598673 | <i>AT2G41190.1</i> | Symbols:                                                     | Transmembrane amino acid transporter family protein      |
| <i>Migut.K00135</i> | LG11 | 606166 | <i>AT3G12600.1</i> | Symbols: atnudt16,<br>NUDT16                                 | nudix hydrolase homolog 16                               |
| <i>Migut.K00136</i> | LG11 | 610559 | <i>AT2G41180.1</i> | Symbols:                                                     | VQ motif-containing protein                              |
| <i>Migut.K00137</i> | LG11 | 612248 | <i>AT5G03415.1</i> | Symbols: DPB, ATDPB                                          | Transcription factor DP                                  |
| <i>Migut.K00138</i> | LG11 | 616622 | <i>AT3G12250.5</i> | Symbols: TGA6, BZIP45                                        | TGACG motif-binding factor 6                             |
| <i>Migut.K00139</i> | LG11 | 619400 | <i>AT1G80270.3</i> | Symbols: PPR596                                              | PENTATRICOPEPTIDE REPEAT 596                             |
| <i>Migut.K00140</i> | LG11 | 623418 | <i>AT1G80270.3</i> | Symbols: PPR596                                              | PENTATRICOPEPTIDE REPEAT 596                             |
| <i>Migut.K00141</i> | LG11 | 627047 | <i>AT2G41140.1</i> | Symbols: CRK1, ATCRK1,<br>ATCBK3                             | CDPK-related kinase 1                                    |

|                     |      |        |                    |                                                         |                                                                                                         |
|---------------------|------|--------|--------------------|---------------------------------------------------------|---------------------------------------------------------------------------------------------------------|
| <i>Migut.K00142</i> | LG11 | 635419 | <i>AT1G63380.1</i> | Symbols:                                                | NAD(P)-binding Rossmann-fold superfamily protein                                                        |
| <i>Migut.K00143</i> | LG11 | 637337 | <i>AT3G55290.2</i> | Symbols:                                                | NAD(P)-binding Rossmann-fold superfamily protein                                                        |
| <i>Migut.K00144</i> | LG11 | 643644 | <i>AT2G17845.1</i> | Symbols:                                                | NAD(P)-binding Rossmann-fold superfamily protein                                                        |
| <i>Migut.K00145</i> | LG11 | 645636 | <i>AT3G55290.1</i> | Symbols:                                                | NAD(P)-binding Rossmann-fold superfamily protein                                                        |
| <i>Migut.K00146</i> | LG11 | 648349 | <i>AT5G05130.1</i> | Symbols:                                                | DNA/RNA helicase protein                                                                                |
| <i>Migut.K00147</i> | LG11 | 653530 | <i>AT5G05140.1</i> | Symbols:                                                | Transcription elongation factor (TFIIS) family                                                          |
| <i>Migut.K00148</i> | LG11 | 659093 | <i>AT5G12250.1</i> | Symbols: TUB6                                           | beta-6 tubulin                                                                                          |
| <i>Migut.K00149</i> | LG11 | 662220 | <i>AT5G06150.1</i> | Symbols: CYC1BAT,<br>CYCB1;2                            | Cyclin family protein                                                                                   |
| <i>Migut.K00150</i> | LG11 | 665267 | <i>AT3G10760.1</i> | Symbols:                                                | Homeodomain-like superfamily protein                                                                    |
| <i>Migut.K00151</i> | LG11 | 666978 | <i>AT3G56680.1</i> | Symbols:                                                | Single-stranded nucleic acid binding R3H protein                                                        |
| <i>Migut.K00152</i> | LG11 | 672438 | <i>AT2G40950.1</i> | Symbols: BZIP17                                         | Basic-leucine zipper (bZIP) transcription                                                               |
| <i>Migut.K00153</i> | LG11 | 675580 | <i>AT3G56650.1</i> | Symbols:                                                | Mog1/PsbP/DUF1795-like photosystem II reaction                                                          |
| <i>Migut.K00154</i> | LG11 | 679660 | <i>AT3G56640.1</i> | Symbols: SEC15A                                         | exocyst complex component sec15A                                                                        |
| <i>Migut.K00155</i> | LG11 | 684816 | <i>AT1G68570.1</i> | Symbols:                                                | Major facilitator superfamily protein                                                                   |
| <i>Migut.K00156</i> | LG11 | 691647 | <i>AT5G07050.1</i> | Symbols:                                                | nodulin MtN21 /EamA-like transporter family protein                                                     |
| <i>Migut.K00157</i> | LG11 | 694522 | <i>AT3G12460.1</i> | Symbols:                                                | Polynucleotidyl transferase, ribonuclease H-like                                                        |
| <i>Migut.K00158</i> | LG11 | 696125 | <i>AT5G48570.1</i> | Symbols: ROF2,<br>ATFKBP65, FKBP65                      | FKBP-type peptidyl-prolyl                                                                               |
| <i>Migut.K00159</i> | LG11 | 699445 | <i>AT3G12460.1</i> | Symbols:<br>Symbols: ATP14K<br>GAMMA 1, PI4K GAMMA<br>1 | Polynucleotidyl transferase, ribonuclease H-like<br>phosphoinositide 4-kinase                           |
| <i>Migut.K00160</i> | LG11 | 701272 | <i>AT2G40850.1</i> |                                                         |                                                                                                         |
| <i>Migut.K00161</i> | LG11 | 704644 | <i>AT2G40840.1</i> | Symbols: DPE2                                           | disproportionating enzyme 2                                                                             |
| <i>Migut.K00162</i> | LG11 | 713499 | <i>AT3G56590.1</i> | Symbols:                                                | hydroxyproline-rich glycoprotein family protein                                                         |
| <i>Migut.K00163</i> | LG11 | 718151 | <i>AT3G49470.1</i> | Symbols: NACA2                                          | nascent polypeptide-associated complex subunit                                                          |
| <i>Migut.K00164</i> | LG11 | 720756 | <i>AT5G39000.1</i> | Symbols:                                                | Malectin/receptor-like protein kinase family protein                                                    |
| <i>Migut.K00165</i> | LG11 | 726411 | <i>AT3G14470.1</i> | Symbols:                                                | NB-ARC domain-containing disease resistance protein                                                     |
| <i>Migut.K00166</i> | LG11 | 729658 | <i>AT2G40830.3</i> | Symbols: RHC1A                                          | RING-H2 finger C1A                                                                                      |
| <i>Migut.K00167</i> | LG11 | 733210 | <i>AT3G56880.1</i> | Symbols:                                                | VQ motif-containing protein                                                                             |
| <i>Migut.K00168</i> | LG11 | 742620 | <i>AT1G72050.2</i> | Symbols: TFIIIA                                         | transcription factor IIIA                                                                               |
| <i>Migut.K00169</i> | LG11 | 746588 | <i>AT3G56900.1</i> | Symbols:                                                | Transducin/WD40 repeat-like superfamily protein                                                         |
| <i>Migut.K00170</i> | LG11 | 752133 | <i>AT3G10740.1</i> | Symbols: ASD1, ARAF1,<br>ARAF, ATASD1                   | alpha-L-arabinofuranosidase                                                                             |
| <i>Migut.K00171</i> | LG11 | 756780 | <i>AT1G73100.1</i> | Symbols: SUVH3, SDG19                                   | SU(VAR)3-9 homolog 3                                                                                    |
| <i>Migut.K00172</i> | LG11 | 761398 | <i>AT5G05070.1</i> | Symbols:                                                | DHHC-type zinc finger family protein                                                                    |
| <i>Migut.K00173</i> | LG11 | 764691 | <i>AT3G56930.1</i> | Symbols:                                                | DHHC-type zinc finger family protein                                                                    |
| <i>Migut.K00174</i> | LG11 | 767638 | <i>AT3G56940.1</i> | Symbols: CRD1, CHL27,<br>ACSF                           | dicarboxylate diiron protein,                                                                           |
| <i>Migut.K00175</i> | LG11 | 769486 | <i>AT3G56950.1</i> | Symbols: SIP2;1, SIP2                                   | small and basic intrinsic protein 2;1                                                                   |
| <i>Migut.K00176</i> | LG11 | 772178 | <i>AT5G61310.4</i> | Symbols:                                                | Cytochrome c oxidase subunit Vc family protein<br>SPFH/Band 7/PHB domain-containing membrane-associated |
| <i>Migut.K00177</i> | LG11 | 776000 | <i>AT5G62740.1</i> | Symbols: HIR1, ATHIR1                                   |                                                                                                         |
| <i>Migut.K00178</i> | LG11 | 778790 | <i>AT2G27020.1</i> | Symbols: PAG1                                           | 20S proteasome alpha subunit G1                                                                         |
| <i>Migut.K00179</i> | LG11 | 782196 | <i>AT2G40980.1</i> | Symbols:                                                | Protein kinase superfamily protein                                                                      |
| <i>Migut.K00180</i> | LG11 | 786255 | <i>AT4G24380.1</i> | Symbols:                                                | INVOLVED IN: 10-formyltetrahydrofolate biosynthetic                                                     |
| <i>Migut.K00181</i> | LG11 | 788355 | <i>AT5G05080.2</i> | Symbols: UBC22,<br>ATUBC22                              | ubiquitin-conjugating enzyme 22                                                                         |
| <i>Migut.K00182</i> | LG11 | 790785 | <i>AT3G43810.1</i> | Symbols: CAM7                                           | calmodulin 7                                                                                            |

|                     |      |         |                    |                               |                                                          |
|---------------------|------|---------|--------------------|-------------------------------|----------------------------------------------------------|
| <i>Migut.K00183</i> | LG11 | 792949  | <i>AT2G41000.1</i> | Symbols:                      | Chaperone DnaJ-domain superfamily protein                |
| <i>Migut.K00184</i> | LG11 | 794691  | <i>AT1G08680.1</i> | Symbols: ZIGA4, AGD14         | ARF GAP-like zinc finger-containing                      |
| <i>Migut.K00185</i> | LG11 | 802355  | <i>AT1G33110.1</i> | Symbols:                      | MATE efflux family protein                               |
| <i>Migut.K00186</i> | LG11 | 812133  | <i>AT3G03620.1</i> | Symbols:                      | MATE efflux family protein                               |
| <i>Migut.K00187</i> | LG11 | 813028  | <i>AT3G03610.1</i> | Symbols:                      | ELMO/CED-12 family protein                               |
| <i>Migut.K00188</i> | LG11 | 826462  | <i>AT5G65180.1</i> | Symbols:                      | ENTH/VHS family protein                                  |
| <i>Migut.K00189</i> | LG11 | 834036  | <i>AT3G43790.1</i> | Symbols: ZIFL2                | zinc induced facilitator-like 2                          |
| <i>Migut.K00190</i> | LG11 | 839563  | <i>AT3G56820.1</i> | Symbols:                      | unknown protein; Has 34 Blast hits to 34 proteins        |
| <i>Migut.K00191</i> | LG11 | 841231  | <i>AT5G04200.1</i> | Symbols: AtMC9, MC9           | metacaspase 9                                            |
| <i>Migut.K00192</i> | LG11 | 854007  | <i>AT3G56820.1</i> | Symbols:                      | unknown protein; Has 34 Blast hits to 34 proteins        |
| <i>Migut.K00193</i> | LG11 | 855665  | <i>AT5G04200.1</i> | Symbols: AtMC9, MC9           | metacaspase 9                                            |
| <i>Migut.K00194</i> | LG11 | 865755  | <i>AT3G57490.1</i> | Symbols:                      | Ribosomal protein S5 family protein                      |
| <i>Migut.K00195</i> | LG11 | 868679  | <i>AT5G04200.1</i> | Symbols: AtMC9, MC9           | metacaspase 9                                            |
| <i>Migut.K00196</i> | LG11 | 877362  | <i>AT5G04200.1</i> | Symbols: AtMC9, MC9           | metacaspase 9                                            |
| <i>Migut.K00197</i> | LG11 | 888533  |                    |                               |                                                          |
| <i>Migut.K00198</i> | LG11 | 890502  | <i>AT5G04200.1</i> | Symbols: AtMC9, MC9           | metacaspase 9                                            |
| <i>Migut.K00199</i> | LG11 | 892736  | <i>AT3G56850.1</i> | Symbols: AREB3, DPBF3         | ABA-responsive element binding protein                   |
| <i>Migut.K00200</i> | LG11 | 896545  | <i>AT3G57490.1</i> | Symbols:                      | Ribosomal protein S5 family protein                      |
| <i>Migut.K00201</i> | LG11 | 899956  | <i>AT4G18710.2</i> | Symbols: BIN2                 | Protein kinase superfamily protein                       |
| <i>Migut.K00202</i> | LG11 | 906307  | <i>AT4G18710.2</i> | Symbols: BIN2                 | Protein kinase superfamily protein                       |
| <i>Migut.K00203</i> | LG11 | 914166  | <i>AT1G05675.1</i> | Symbols:                      | UDP-Glycosyltransferase superfamily protein              |
| <i>Migut.K00204</i> | LG11 | 921725  | <i>AT5G04190.1</i> | Symbols: PKS4                 | phytochrome kinase substrate 4                           |
| <i>Migut.K00205</i> | LG11 | 926985  | <i>AT3G03660.1</i> | Symbols: WOX11                | WUSCHEL related homeobox 11                              |
| <i>Migut.K00206</i> | LG11 | 939150  | <i>AT5G04200.1</i> | Symbols: AtMC9, MC9           | metacaspase 9                                            |
| <i>Migut.K00207</i> | LG11 | 948466  | <i>AT5G04200.1</i> | Symbols: AtMC9, MC9           | metacaspase 9                                            |
| <i>Migut.K00208</i> | LG11 | 962485  | <i>AT5G04200.1</i> | Symbols: AtMC9, MC9           | metacaspase 9                                            |
| <i>Migut.K00209</i> | LG11 | 969247  | <i>AT5G04200.1</i> | Symbols: AtMC9, MC9           | metacaspase 9                                            |
| <i>Migut.K00210</i> | LG11 | 972861  | <i>AT5G04200.1</i> | Symbols: AtMC9, MC9           | metacaspase 9                                            |
| <i>Migut.K00211</i> | LG11 | 977072  | <i>AT3G47510.1</i> | Symbols:                      | unknown protein; FUNCTIONS IN: molecular_function        |
| <i>Migut.K00212</i> | LG11 | 982609  | <i>AT1G50720.1</i> | Symbols:                      | Stigma-specific Stig1 family protein                     |
| <i>Migut.K00213</i> | LG11 | 985730  | <i>AT3G03680.1</i> | Symbols:                      | C2 calcium/lipid-binding plant phosphoribosyltransferase |
| <i>Migut.K00214</i> | LG11 | 991952  | <i>AT2G45100.1</i> | Symbols:                      | Cyclin/Brf1-like TBP-binding protein                     |
| <i>Migut.K00215</i> | LG11 | 998008  | <i>AT3G45400.1</i> | Symbols:                      | exostosin family protein                                 |
| <i>Migut.K00216</i> | LG11 | 1000268 | <i>AT5G17770.1</i> | Symbols: ATCBR, CBR1, CBR     | NADH:cytochrome B5 reductase 1                           |
| <i>Migut.K00217</i> | LG11 | 1003433 | <i>AT2G31270.1</i> | Symbols: ATCDT1A, CDT1A, CDT1 | homolog of yeast CDT1 A                                  |
| <i>Migut.K00218</i> | LG11 | 1007538 | <i>AT5G17780.1</i> | Symbols:                      | alpha/beta-Hydrolases superfamily protein                |
| <i>Migut.K00219</i> | LG11 | 1009621 | <i>AT5G17790.1</i> | Symbols: VAR3                 | zinc finger (Ran-binding) family protein                 |
| <i>Migut.K00220</i> | LG11 | 1012714 | <i>AT1G58030.1</i> | Symbols: CAT2                 | cationic amino acid transporter 2                        |
| <i>Migut.K00221</i> | LG11 | 1016722 | <i>AT4G01650.2</i> | Symbols:                      | Polyketide cyclase / dehydrase and lipid transport       |
| <i>Migut.K00222</i> | LG11 | 1020278 | <i>AT1G08810.1</i> | Symbols: MYB60, AtMYB60       | myb domain protein 60                                    |
| <i>Migut.K00223</i> | LG11 | 1022313 | <i>AT1G28760.1</i> | Symbols:                      | Uncharacterized conserved protein (DUF2215)              |
| <i>Migut.K00224</i> | LG11 | 1027966 | <i>AT5G44800.1</i> | Symbols: CHR4, PKR1           | chromatin remodeling 4                                   |
| <i>Migut.K00225</i> | LG11 | 1036979 | <i>AT4G30160.1</i> | Symbols: VLN4, ATVLN4         | villin 4                                                 |

|                     |      |         |                    |                                          |                                                                       |
|---------------------|------|---------|--------------------|------------------------------------------|-----------------------------------------------------------------------|
| <i>Migut.K00226</i> | LG11 | 1045167 | <i>AT5G20500.1</i> | Symbols:                                 | Glutaredoxin family protein                                           |
| <i>Migut.K00227</i> | LG11 | 1047404 | <i>AT1G50090.1</i> | Symbols:                                 | D-aminoacid aminotransferase-like PLP-dependent                       |
| <i>Migut.K00228</i> | LG11 | 1050950 | <i>AT4G16780.1</i> | Symbols: ATHB-2, HAT4,<br>ATHB2, HB-2    | homeobox protein 2                                                    |
| <i>Migut.K00229</i> | LG11 | 1052272 | <i>AT2G18910.1</i> | Symbols:                                 | hydroxyproline-rich glycoprotein family protein                       |
| <i>Migut.K00230</i> | LG11 | 1053533 | <i>AT5G57360.1</i> | Symbols: ZTL, LKP1,<br>ADO1, FKL2        | Galactose oxidase/kelch repeat                                        |
| <i>Migut.K00231</i> | LG11 | 1058365 | <i>AT2G18950.1</i> | Symbols: HPT1, TPT1,<br>ATHPT, VTE2      | homogentisate phytyltransferase                                       |
| <i>Migut.K00232</i> | LG11 | 1064669 | <i>AT4G30190.1</i> | Symbols: AHA2, PMA2,<br>HA2              | H(+)-ATPase 2                                                         |
| <i>Migut.K00233</i> | LG11 | 1070770 | <i>AT5G57330.1</i> | Symbols:                                 | Galactose mutarotase-like superfamily protein                         |
| <i>Migut.K00234</i> | LG11 | 1073390 | <i>AT5G57330.1</i> | Symbols:                                 | Galactose mutarotase-like superfamily protein                         |
| <i>Migut.K00235</i> | LG11 | 1076155 | <i>AT5G57330.1</i> | Symbols:                                 | Galactose mutarotase-like superfamily protein                         |
| <i>Migut.K00236</i> | LG11 | 1083288 | <i>AT5G57330.1</i> | Symbols:                                 | Galactose mutarotase-like superfamily protein                         |
| <i>Migut.K00237</i> | LG11 | 1086137 | <i>AT5G57330.1</i> | Symbols:                                 | Galactose mutarotase-like superfamily protein                         |
| <i>Migut.K00238</i> | LG11 | 1087870 | <i>AT5G20600.1</i> | Symbols:                                 | FUNCTIONS IN: molecular_function unknown; INVOLVED                    |
| <i>Migut.K00239</i> | LG11 | 1090697 | <i>AT4G30200.3</i> | Symbols: VEL1, VIL2                      | vernalization5/VIN3-like                                              |
| <i>Migut.K00240</i> | LG11 | 1094877 | <i>AT5G57410.1</i> | Symbols:                                 | Afadin/alpha-actinin-binding protein                                  |
| <i>Migut.K00241</i> | LG11 | 1100075 | <i>AT4G30210.2</i> | Symbols: ATR2, AR2                       | P450 reductase 2                                                      |
| <i>Migut.K00242</i> | LG11 | 1105316 | <i>AT4G30230.1</i> | Symbols:                                 | unknown protein; Has 42 Blast hits to 42 proteins                     |
| <i>Migut.K00243</i> | LG11 | 1107494 | <i>AT2G18860.1</i> | Symbols:                                 | Syntaxin/t-SNARE family protein                                       |
| <i>Migut.K00244</i> | LG11 | 1111290 | <i>AT2G18850.2</i> | Symbols:                                 | SET domain-containing protein                                         |
| <i>Migut.K00245</i> | LG11 | 1115335 | <i>AT4G30260.1</i> | Symbols:                                 | Integral membrane Yip1 family protein                                 |
| <i>Migut.K00246</i> | LG11 | 1119750 | <i>AT5G54550.1</i> | Symbols:                                 | Protein of unknown function (DUF295)                                  |
| <i>Migut.K00247</i> | LG11 | 1121413 | <i>AT5G57490.1</i> | Symbols: VDAC4,<br>ATVDAC4               | voltage dependent anion channel 4                                     |
| <i>Migut.K00248</i> | LG11 | 1127594 | <i>AT5G57510.1</i> | Symbols:                                 | unknown protein; Has 27 Blast hits to 27 proteins                     |
| <i>Migut.K00249</i> | LG11 | 1132104 | <i>AT5G57520.1</i> | Symbols: ZFP2, ATZFP2                    | zinc finger protein 2                                                 |
| <i>Migut.K00250</i> | LG11 | 1136263 | <i>AT4G25810.1</i> | Symbols: XTR6, XTH23                     | xyloglucan endotransglycosylase 6                                     |
| <i>Migut.K00251</i> | LG11 | 1139197 | <i>AT4G30270.1</i> | Symbols: MERI5B, MERI-<br>5, XTH24, SEN4 | xyloglucan endotransglucosylase/hydrolase                             |
| <i>Migut.K00252</i> | LG11 | 1142053 | <i>AT4G25810.1</i> | Symbols: XTR6, XTH23                     | xyloglucan endotransglycosylase 6                                     |
| <i>Migut.K00253</i> | LG11 | 1143906 | <i>AT5G57580.1</i> | Symbols:                                 | Calmodulin-binding protein                                            |
| <i>Migut.K00254</i> | LG11 | 1154888 | <i>AT5G57610.1</i> | Symbols:                                 | Protein kinase superfamily protein with<br>octicosapeptide/Phox/Bem1p |
| <i>Migut.K00255</i> | LG11 | 1169692 | <i>AT5G57610.1</i> | Symbols:                                 | Protein kinase superfamily protein with<br>octicosapeptide/Phox/Bem1p |
| <i>Migut.K00256</i> | LG11 | 1172933 | <i>AT5G57620.1</i> | Symbols: MYB36,<br>AtMYB36               | myb domain protein 36                                                 |
| <i>Migut.K00257</i> | LG11 | 1176828 | <i>AT5G17050.1</i> | Symbols: UGT78D2                         | UDP-glucosyl transferase 78D2                                         |
| <i>Migut.K00258</i> | LG11 | 1179523 | <i>AT4G25780.1</i> | Symbols:                                 | CAP (Cysteine-rich secretory proteins, Antigen                        |
| <i>Migut.K00259</i> | LG11 | 1182000 | <i>AT4G30320.1</i> | Symbols:                                 | CAP (Cysteine-rich secretory proteins, Antigen                        |
| <i>Migut.K00260</i> | LG11 | 1187785 | <i>AT5G57655.2</i> | Symbols:                                 | xylose isomerase family protein                                       |
| <i>Migut.K00261</i> | LG11 | 1193151 | <i>AT2G24765.1</i> | Symbols: ARF3, ARL1,<br>ATARL1           | ADP-ribosylation factor 3                                             |
| <i>Migut.K00262</i> | LG11 | 1198674 | <i>AT5G57660.1</i> | Symbols: ATCOL5, COL5                    | CONSTANS-like 5                                                       |
| <i>Migut.K00263</i> | LG11 | 1201745 | <i>AT5G57670.2</i> | Symbols:                                 | Protein kinase superfamily protein                                    |
| <i>Migut.K00264</i> | LG11 | 1208641 | <i>AT5G57685.1</i> | Symbols: ATGDU3,<br>GDU3, LSB1           | glutamine dumper 3                                                    |

|                     |      |         |                    |                                 |                                                              |
|---------------------|------|---------|--------------------|---------------------------------|--------------------------------------------------------------|
| <i>Migut.K00265</i> | LG11 | 1213439 | <i>AT2G18730.1</i> | Symbols: ATDGK3, DGK3           | diacylglycerol kinase 3                                      |
| <i>Migut.K00266</i> | LG11 | 1217910 | <i>AT4G28020.1</i> | Symbols:                        | unknown protein; CONTAINS InterPro DOMAIN/s: Uncharacterised |
| <i>Migut.K00267</i> | LG11 | 1225066 | <i>AT5G57710.1</i> | Symbols:                        | Double Clp-N motif-containing P-loop nucleoside              |
| <i>Migut.K00268</i> | LG11 | 1229982 | <i>AT2G18700.1</i> | Symbols: ATTPS11, TPS11, ATTPSB | trehalose phosphatase/synthase                               |
| <i>Migut.K00269</i> | LG11 | 1238591 | <i>AT4G28025.2</i> | Symbols:                        | unknown protein.                                             |
| <i>Migut.K00270</i> | LG11 | 1241704 | <i>AT2G18690.1</i> | Symbols:                        | unknown protein; FUNCTIONS IN: molecular_function            |
| <i>Migut.K00271</i> | LG11 | 1246349 | <i>AT2G18680.1</i> | Symbols:                        | unknown protein; FUNCTIONS IN: molecular_function            |
| <i>Migut.K00272</i> | LG11 | 1248364 | <i>AT2G18670.1</i> | Symbols:                        | RING/U-box superfamily protein                               |
| <i>Migut.K00273</i> | LG11 | 1250435 | <i>AT4G30400.1</i> | Symbols:                        | RING/U-box superfamily protein                               |
| <i>Migut.K00274</i> | LG11 | 1255974 | <i>AT5G57740.1</i> | Symbols: XBAT32                 | XB3 ortholog 2 in Arabidopsis thaliana                       |
| <i>Migut.K00275</i> | LG11 | 1260075 | <i>AT5G14850.1</i> | Symbols:                        | Alg9-like mannosyltransferase family                         |
| <i>Migut.K00276</i> | LG11 | 1263391 | <i>AT4G30410.1</i> | Symbols:                        | sequence-specific DNA binding transcription factors          |
| <i>Migut.K00277</i> | LG11 | 1270559 | <i>AT5G57800.1</i> | Symbols: FLP1, YRE, CER3, WAX2  | Fatty acid hydroxylase superfamily                           |
| <i>Migut.K00278</i> | LG11 | 1278620 | <i>AT4G30420.1</i> | Symbols:                        | nodulin MtN21 /EamA-like transporter family protein          |
| <i>Migut.K00279</i> | LG11 | 1282229 | <i>AT4G24972.1</i> | Symbols: TPD1                   | tapetum determinant 1                                        |
| <i>Migut.K00280</i> | LG11 | 1283802 | <i>AT5G57330.1</i> | Symbols:                        | Galactose mutarotase-like superfamily protein                |
| <i>Migut.K00281</i> | LG11 | 1286833 | <i>AT3G61610.1</i> | Symbols:                        | Galactose mutarotase-like superfamily protein                |
| <i>Migut.K00282</i> | LG11 | 1289015 | <i>AT1G32583.1</i> | Symbols:                        | FUNCTIONS IN: molecular_function unknown; INVOLVED           |
| <i>Migut.K00283</i> | LG11 | 1290071 | <i>AT4G24972.1</i> | Symbols: TPD1                   | tapetum determinant 1                                        |
| <i>Migut.K00284</i> | LG11 | 1291088 | <i>AT5G57815.1</i> | Symbols:                        | Cytochrome c oxidase, subunit Vib family protein             |
| <i>Migut.K00285</i> | LG11 | 1293690 | <i>AT4G30460.1</i> | Symbols:                        | glycine-rich protein                                         |
| <i>Migut.K00286</i> | LG11 | 1300155 | <i>AT4G30440.1</i> | Symbols: GAE1                   | UDP-D-glucuronate 4-epimerase 1                              |
| <i>Migut.K00287</i> | LG11 | 1302901 | <i>AT2G23890.1</i> | Symbols:                        | HAD-superfamily hydrolase, subfamily IG, 5'-nucleotidase     |
| <i>Migut.K00288</i> | LG11 | 1309507 | <i>AT4G30480.2</i> | Symbols: TPR1, AtTPR1           | Tetratricopeptide repeat (TPR)-like                          |
| <i>Migut.K00289</i> | LG11 | 1314136 | <i>AT5G35200.1</i> | Symbols:                        | ENTH/ANTH/VHS superfamily protein                            |
| <i>Migut.K00290</i> | LG11 | 1319763 | <i>AT4G30490.1</i> | Symbols:                        | AFG1-like ATPase family protein                              |
| <i>Migut.K00291</i> | LG11 | 1325691 | <i>AT2G23940.1</i> | Symbols:                        | Protein of unknown function (DUF788)                         |
| <i>Migut.K00292</i> | LG11 | 1327682 | <i>AT4G30510.1</i> | Symbols: ATATG18B, ATG18B, G18B | homolog of yeast autophagy                                   |
| <i>Migut.K00293</i> | LG11 | 1331935 | <i>AT4G12650.1</i> | Symbols:                        | Endomembrane protein 70 protein family                       |
| <i>Migut.K00294</i> | LG11 | 1336520 | <i>AT4G11120.1</i> | Symbols:                        | translation elongation factor Ts (EF-Ts), putative           |
| <i>Migut.K00295</i> | LG11 | 1340897 | <i>AT2G23950.1</i> | Symbols:                        | Leucine-rich repeat protein kinase family protein            |
| <i>Migut.K00296</i> | LG11 | 1348220 | <i>AT3G49410.1</i> | Symbols:                        | Transcription factor IIIC, subunit 5                         |
| <i>Migut.K00297</i> | LG11 | 1355566 |                    |                                 |                                                              |
| <i>Migut.K00298</i> | LG11 | 1359559 | <i>AT1G16060.1</i> | Symbols: ADAP                   | ARIA-interacting double AP2 domain protein                   |
| <i>Migut.K00299</i> | LG11 | 1365011 | <i>AT4G30850.2</i> | Symbols: HHP2                   | heptahelical transmembrane protein2                          |
| <i>Migut.K00300</i> | LG11 | 1368293 | <i>AT4G28080.1</i> | Symbols:                        | Tetratricopeptide repeat (TPR)-like superfamily              |
| <i>Migut.K00301</i> | LG11 | 1382291 | <i>AT2G24090.1</i> | Symbols:                        | Ribosomal protein L35                                        |
| <i>Migut.K00302</i> | LG11 | 1383839 | <i>AT4G30790.1</i> | Symbols:                        | INVOLVED IN: autophagy; EXPRESSED IN: 24 plant               |
| <i>Migut.K00303</i> | LG11 | 1394432 | <i>AT4G30810.1</i> | Symbols: scpl29                 | serine carboxypeptidase-like 29                              |
| <i>Migut.K00304</i> | LG11 | 1403825 | <i>AT5G63010.1</i> | Symbols:                        | Transducin/WD40 repeat-like superfamily protein              |
| <i>Migut.K00305</i> | LG11 | 1408150 | <i>AT5G57860.2</i> | Symbols:                        | Ubiquitin-like superfamily protein                           |
| <i>Migut.K00306</i> | LG11 | 1415738 | <i>AT2G24070.2</i> | Symbols: QWRF4                  | Family of unknown function (DUF566)                          |
| <i>Migut.K00307</i> | LG11 | 1420390 | <i>AT4G30700.1</i> | Symbols:                        | Pentatricopeptide repeat (PPR) superfamily protein           |

|                     |      |         |                    |                                                           |                                                    |
|---------------------|------|---------|--------------------|-----------------------------------------------------------|----------------------------------------------------|
| <i>Migut.K00308</i> | LG11 | 1423074 | <i>AT2G24060.1</i> | Symbols:                                                  | Translation initiation factor 3 protein            |
| <i>Migut.K00309</i> | LG11 | 1427288 | <i>AT1G16030.1</i> | Symbols: Hsp70b                                           | heat shock protein 70B                             |
| <i>Migut.K00310</i> | LG11 | 1430683 | <i>AT5G57870.2</i> | Symbols: eIFiso4G1                                        | MIF4G domain-containing protein / MA3              |
| <i>Migut.K00311</i> | LG11 | 1436649 |                    |                                                           |                                                    |
| <i>Migut.K00312</i> | LG11 | 1437774 |                    |                                                           |                                                    |
| <i>Migut.K00313</i> | LG11 | 1439122 |                    |                                                           |                                                    |
| <i>Migut.K00314</i> | LG11 | 1439836 | <i>AT4G28088.1</i> | Symbols:                                                  | Low temperature and salt responsive protein family |
| <i>Migut.K00315</i> | LG11 | 1442008 | <i>AT5G61750.1</i> | Symbols:                                                  | RmlC-like cupins superfamily protein               |
| <i>Migut.K00316</i> | LG11 | 1443564 | <i>AT5G57910.1</i> | Symbols:                                                  | unknown protein; BEST Arabidopsis thaliana protein |
| <i>Migut.K00317</i> | LG11 | 1448737 | <i>AT4G30620.1</i> | Symbols:                                                  | Uncharacterised BCR, YbaB family COG0718           |
| <i>Migut.K00318</i> | LG11 | 1450232 | <i>AT4G30610.1</i> | Symbols: BRS1, SCPL24                                     | alpha/beta-Hydrolases superfamily protein          |
| <i>Migut.K00319</i> | LG11 | 1459288 | <i>AT3G59500.1</i> | Symbols:                                                  | Integral membrane HRF1 family protein              |
| <i>Migut.K00320</i> | LG11 | 1475438 | <i>AT4G31830.1</i> | Symbols:                                                  | unknown protein; Has 42 Blast hits to 42 proteins  |
| <i>Migut.K00321</i> | LG11 | 1477513 | <i>AT4G30580.1</i> | Symbols: ATS2,<br>EMB1995, LPAT1                          | Phospholipid/glycerol acyltransferase              |
| <i>Migut.K00322</i> | LG11 | 1481475 | <i>AT5G57940.3</i> | Symbols: ATCNGC5,<br>CNGC5                                | cyclic nucleotide gated channel 5                  |
| <i>Migut.K00323</i> | LG11 | 1487185 | <i>AT5G57330.1</i> | Symbols:                                                  | Galactose mutarotase-like superfamily protein      |
| <i>Migut.K00324</i> | LG11 | 1489808 | <i>AT5G10840.1</i> | Symbols:                                                  | Endomembrane protein 70 protein family             |
| <i>Migut.K00325</i> | LG11 | 1497845 | <i>AT5G35770.1</i> | Symbols: SAP                                              | Transducin/WD40 repeat-like superfamily protein    |
| <i>Migut.K00326</i> | LG11 | 1501210 | <i>AT4G30900.2</i> | Symbols:                                                  | DNAse I-like superfamily protein                   |
| <i>Migut.K00327</i> | LG11 | 1505313 | <i>AT4G30920.1</i> | Symbols:                                                  | Cytosol aminopeptidase family protein              |
| <i>Migut.K00328</i> | LG11 | 1515452 | <i>AT4G30935.1</i> | Symbols: WRKY32,<br>ATWRKY32                              | WRKY DNA-binding protein 32                        |
| <i>Migut.K00329</i> | LG11 | 1522322 | <i>AT2G24230.1</i> | Symbols:                                                  | Leucine-rich repeat protein kinase family protein  |
| <i>Migut.K00330</i> | LG11 | 1526453 | <i>AT5G57990.1</i> | Symbols: UBP23                                            | ubiquitin-specific protease 23                     |
| <i>Migut.K00331</i> | LG11 | 1532790 | <i>AT1G50670.1</i> | Symbols:                                                  | OTU-like cysteine protease family protein          |
| <i>Migut.K00332</i> | LG11 | 1536816 | <i>AT2G24240.1</i> | Symbols:                                                  | BTB/POZ domain with WD40/YVTN repeat-like protein  |
| <i>Migut.K00333</i> | LG11 | 1539750 | <i>AT4G30950.1</i> | Symbols: FAD6, FADC,<br>SFD4                              | fatty acid desaturase 6                            |
| <i>Migut.K00334</i> | LG11 | 1545795 | <i>AT5G58000.1</i> | Symbols:                                                  | Reticulon family protein                           |
| <i>Migut.K00335</i> | LG11 | 1575468 | <i>AT4G30960.1</i> | Symbols: CIPK6, SIP3,<br>SNRK3.14, ATCIPK6                | SOS3-interacting                                   |
| <i>Migut.K00336</i> | LG11 | 1579498 | <i>AT2G24260.1</i> | Symbols: LRL1                                             | LJRH1-like 1                                       |
| <i>Migut.K00337</i> | LG11 | 1585099 | <i>AT5G58005.2</i> | Symbols:                                                  | Cytochrome c oxidase, subunit Vib family protein   |
| <i>Migut.K00338</i> | LG11 | 1591217 | <i>AT1G50680.1</i> | Symbols:                                                  | AP2/B3 transcription factor family protein         |
| <i>Migut.K00339</i> | LG11 | 1596686 | <i>AT2G24260.1</i> | Symbols: LRL1                                             | LJRH1-like 1                                       |
| <i>Migut.K00340</i> | LG11 | 1604344 | <i>AT5G58030.1</i> | Symbols:                                                  | Transport protein particle (TRAPP) component       |
| <i>Migut.K00341</i> | LG11 | 1607608 | <i>AT2G38350.1</i> | Symbols:                                                  | unknown protein; FUNCTIONS IN: molecular_function  |
| <i>Migut.K00342</i> | LG11 | 1610390 | <i>AT3G07010.1</i> | Symbols:                                                  | Pectin lyase-like superfamily protein              |
| <i>Migut.K00343</i> | LG11 | 1613542 | <i>AT1G19485.2</i> | Symbols:                                                  | Transducin/WD40 repeat-like superfamily protein    |
| <i>Migut.K00344</i> | LG11 | 1618611 | <i>AT5G58070.1</i> | Symbols: ATTIL, TIL                                       | temperature-induced lipocalin                      |
| <i>Migut.K00345</i> | LG11 | 1620195 | <i>AT5G58060.1</i> | Symbols: YKT61,<br>ATYKT61, ATGP1                         | SNARE-like superfamily protein                     |
| <i>Migut.K00346</i> | LG11 | 1624046 | <i>AT2G24290.1</i> | Symbols:                                                  | Protein of unknown function (DUF1068)              |
| <i>Migut.K00347</i> | LG11 | 1627163 | <i>AT2G25180.1</i> | Symbols: ARR12, RR12                                      | response regulator 12                              |
| <i>Migut.K00348</i> | LG11 | 1633566 | <i>AT5G67030.2</i> | Symbols: ABA1, LOS6,<br>NPQ2, ATABA1, ZEP, IBS3,<br>ATZEP | zeaxanthin                                         |

|                     |      |         |                    |                             |                                                                    |
|---------------------|------|---------|--------------------|-----------------------------|--------------------------------------------------------------------|
| <i>Migut.K00349</i> | LG11 | 1636366 | <i>AT2G25180.1</i> | Symbols: ARR12, RR12        | response regulator 12                                              |
| <i>Migut.K00350</i> | LG11 | 1639455 | <i>AT4G31020.1</i> | Symbols:                    | alpha/beta-Hydrolases superfamily protein                          |
| <i>Migut.K00351</i> | LG11 | 1645372 | <i>AT5G58200.2</i> | Symbols:                    | Calcineurin-like metallo-phosphoesterase superfamily               |
| <i>Migut.K00352</i> | LG11 | 1648955 | <i>AT1G17130.1</i> | Symbols:                    | Family of unknown function (DUF572)                                |
| <i>Migut.K00353</i> | LG11 | 1652725 | <i>AT5G35330.3</i> | Symbols: MBD02              | methyl-CPG-binding domain protein 02                               |
| <i>Migut.K00354</i> | LG11 | 1656769 | <i>AT5G35330.3</i> | Symbols: MBD02              | methyl-CPG-binding domain protein 02                               |
| <i>Migut.K00355</i> | LG11 | 1659530 | <i>AT4G23290.1</i> | Symbols: CRK21              | cysteine-rich RLK (RECEPTOR-like protein kinase)                   |
| <i>Migut.K00356</i> | LG11 | 1668743 | <i>AT4G19810.1</i> | Symbols:                    | Glycosyl hydrolase family protein with chitinase                   |
| <i>Migut.K00357</i> | LG11 | 1671325 | <i>AT3G42640.1</i> | Symbols: AHA8, HA8          | H(+)-ATPase 8                                                      |
| <i>Migut.K00358</i> | LG11 | 1676615 | <i>AT1G80710.1</i> | Symbols: DRS1               | DROUGHT SENSITIVE 1                                                |
| <i>Migut.K00359</i> | LG11 | 1679828 | <i>AT2G22650.1</i> | Symbols:                    | FAD-dependent oxidoreductase family protein                        |
| <i>Migut.K00360</i> | LG11 | 1683524 | <i>AT4G38500.1</i> | Symbols:                    | Protein of unknown function (DUF616)                               |
| <i>Migut.K00361</i> | LG11 | 1687337 | <i>AT2G07690.1</i> | Symbols: MCM5               | Minichromosome maintenance (MCM2/3/5) family                       |
| <i>Migut.K00362</i> | LG11 | 1693236 | <i>AT5G20320.1</i> | Symbols: DCL4, ATDCL4       | dicer-like 4                                                       |
| <i>Migut.K00363</i> | LG11 | 1706333 | <i>AT5G51350.1</i> | Symbols:                    | Leucine-rich repeat transmembrane protein kinase                   |
| <i>Migut.K00364</i> | LG11 | 1714349 | <i>AT5G35180.2</i> | Symbols:                    | Protein of unknown function (DUF1336)                              |
| <i>Migut.K00365</i> | LG11 | 1725861 | <i>AT4G02050.1</i> | Symbols: STP7               | sugar transporter protein 7                                        |
| <i>Migut.K00366</i> | LG11 | 1733256 | <i>AT5G35170.1</i> | Symbols:                    | adenylate kinase family protein                                    |
| <i>Migut.K00367</i> | LG11 | 1740740 | <i>AT5G35160.2</i> | Symbols:                    | Endomembrane protein 70 protein family                             |
| <i>Migut.K00368</i> | LG11 | 1760558 | <i>AT2G46490.1</i> | Symbols:                    | unknown protein; BEST Arabidopsis thaliana protein                 |
| <i>Migut.K00369</i> | LG11 | 1764159 | <i>AT5G35110.1</i> | Symbols:                    | unknown protein; BEST Arabidopsis thaliana protein                 |
| <i>Migut.K00370</i> | LG11 | 1765770 | <i>AT5G35110.1</i> | Symbols:                    | unknown protein; BEST Arabidopsis thaliana protein                 |
| <i>Migut.K00371</i> | LG11 | 1767296 | <i>AT2G46490.1</i> | Symbols:                    | unknown protein; BEST Arabidopsis thaliana protein                 |
| <i>Migut.K00372</i> | LG11 | 1769057 | <i>AT5G35110.1</i> | Symbols:                    | unknown protein; BEST Arabidopsis thaliana protein                 |
| <i>Migut.K00373</i> | LG11 | 1770463 | <i>AT5G35110.1</i> | Symbols:                    | unknown protein; BEST Arabidopsis thaliana protein                 |
| <i>Migut.K00374</i> | LG11 | 1772107 | <i>AT5G35110.1</i> | Symbols:                    | unknown protein; BEST Arabidopsis thaliana protein                 |
| <i>Migut.K00375</i> | LG11 | 1774359 | <i>AT5G07680.2</i> | Symbols: ANAC080,<br>NAC080 | NAC domain containing protein 80                                   |
| <i>Migut.K00376</i> | LG11 | 1784589 | <i>AT5G25220.1</i> | Symbols: KNAT3              | KNOTTED1-like homeobox gene 3                                      |
| <i>Migut.K00377</i> | LG11 | 1787889 | <i>AT5G62865.1</i> | Symbols:                    | unknown protein; BEST Arabidopsis thaliana protein                 |
| <i>Migut.K00378</i> | LG11 | 1790302 | <i>AT3G46920.1</i> | Symbols:                    | Protein kinase superfamily protein with octicosapeptide/Phox/Bem1p |
| <i>Migut.K00379</i> | LG11 | 1796183 | <i>AT5G11070.1</i> | Symbols:                    | unknown protein; Has 1807 Blast hits to 1807 proteins              |
| <i>Migut.K00380</i> | LG11 | 1798552 | <i>AT2G15580.2</i> | Symbols:                    | RING/U-box superfamily protein                                     |
| <i>Migut.K00381</i> | LG11 | 1800477 | <i>AT1G48960.1</i> | Symbols:                    | Adenine nucleotide alpha hydrolases-like superfamily               |
| <i>Migut.K00382</i> | LG11 | 1803166 | <i>AT2G15580.1</i> | Symbols:                    | RING/U-box superfamily protein                                     |
| <i>Migut.K00383</i> | LG11 | 1805864 | <i>AT5G18370.1</i> | Symbols:                    | Disease resistance protein (TIR-NBS-LRR class)                     |
| <i>Migut.K00384</i> | LG11 | 1808247 | <i>AT5G45290.1</i> | Symbols:                    | RING/U-box superfamily protein                                     |
| <i>Migut.K00385</i> | LG11 | 1815811 | <i>AT4G16515.1</i> | Symbols: RGF6               | Encodes a root meristem growth factor (RGF).                       |
| <i>Migut.K00386</i> | LG11 | 1819368 | <i>AT1G79620.1</i> | Symbols:                    | Leucine-rich repeat protein kinase family protein                  |
| <i>Migut.K00387</i> | LG11 | 1841632 | <i>AT3G04690.1</i> | Symbols: ANX1               | Malectin/receptor-like protein kinase family                       |
| <i>Migut.K00388</i> | LG11 | 1853172 | <i>AT5G54380.1</i> | Symbols: THE1               | protein kinase family protein                                      |
| <i>Migut.K00389</i> | LG11 | 1856274 | <i>AT2G41040.1</i> | Symbols:                    | S-adenosyl-L-methionine-dependent methyltransferases               |
| <i>Migut.K00390</i> | LG11 | 1859366 | <i>AT1G19250.1</i> | Symbols: FMO1               | flavin-dependent monooxygenase 1                                   |
| <i>Migut.K00391</i> | LG11 | 1864986 | <i>AT1G19250.1</i> | Symbols: FMO1               | flavin-dependent monooxygenase 1                                   |
| <i>Migut.K00392</i> | LG11 | 1874109 | <i>AT2G12646.1</i> | Symbols:                    | PLATZ transcription factor family protein                          |

|                     |      |         |                    |                                                           |                                                             |
|---------------------|------|---------|--------------------|-----------------------------------------------------------|-------------------------------------------------------------|
| <i>Migut.K00393</i> | LG11 | 1884368 | <i>AT2G41210.1</i> | Symbols: PIP5K5                                           | phosphatidylinositol- 4-phosphate 5-kinase                  |
| <i>Migut.K00394</i> | LG11 | 1885967 | <i>AT5G25280.2</i> | Symbols:                                                  | serine-rich protein-related                                 |
| <i>Migut.K00395</i> | LG11 | 1894125 | <i>AT4G35165.1</i> | Symbols:                                                  | Protein of unknown function (DUF1278)                       |
| <i>Migut.K00396</i> | LG11 | 1901582 | <i>AT5G59180.1</i> | Symbols: NRPB7                                            | DNA-directed RNA polymerase II                              |
| <i>Migut.K00397</i> | LG11 | 1905251 | <i>AT5G59180.1</i> | Symbols: NRPB7                                            | DNA-directed RNA polymerase II                              |
| <i>Migut.K00398</i> | LG11 | 1912468 | <i>AT2G25290.3</i> | Symbols: Phox1                                            | Octicosapeptide/Phox/Bem1p (PB1) domain-containing          |
| <i>Migut.K00399</i> | LG11 | 1916064 | <i>AT5G51940.1</i> | Symbols: NRPB6A,<br>NRPD6A, NRPE6A                        | RNA polymerase Rpb6                                         |
| <i>Migut.K00400</i> | LG11 | 1920173 | <i>AT5G34940.2</i> | Symbols: AtGUS3, GUS3                                     | glucuronidase 3                                             |
| <i>Migut.K00401</i> | LG11 | 1924115 | <i>AT5G20380.1</i> | Symbols: PHT4;5                                           | phosphate transporter 4;5                                   |
| <i>Migut.K00402</i> | LG11 | 1928321 |                    |                                                           |                                                             |
| <i>Migut.K00403</i> | LG11 | 1929611 | <i>AT5G20400.1</i> | Symbols:                                                  | 2-oxoglutarate (2OG) and Fe(II)-dependent oxygenase         |
| <i>Migut.K00404</i> | LG11 | 1931498 | <i>AT1G15710.1</i> | Symbols:                                                  | prephenate dehydrogenase family protein                     |
| <i>Migut.K00405</i> | LG11 | 1934545 | <i>AT1G15690.1</i> | Symbols: AVP1, ATAVP3,<br>AVP-3, AtVHP1;1                 | Inorganic H pyrophosphatase                                 |
| <i>Migut.K00406</i> | LG11 | 1941700 | <i>AT4G34990.1</i> | Symbols: AtMYB32,<br>MYB32                                | myb domain protein 32                                       |
| <i>Migut.K00407</i> | LG11 | 1943535 | <i>AT2G21500.1</i> | Symbols:                                                  | RING/U-box superfamily protein                              |
| <i>Migut.K00408</i> | LG11 | 1946388 | <i>AT1G07985.1</i> | Symbols:                                                  | Expressed protein                                           |
| <i>Migut.K00409</i> | LG11 | 1949607 | <i>AT5G20410.1</i> | Symbols: MGD2,<br>ATMGD2                                  | monogalactosyldiacylglycerol synthase                       |
| <i>Migut.K00410</i> | LG11 | 1953197 | <i>AT1G60430.2</i> | Symbols: ARPC3                                            | actin-related protein C3                                    |
| <i>Migut.K00411</i> | LG11 | 1961675 | <i>AT5G10790.1</i> | Symbols: UBP22                                            | ubiquitin-specific protease 22                              |
| <i>Migut.K00412</i> | LG11 | 1969031 | <i>AT5G20300.3</i> | Symbols:                                                  | Avirulence induced gene (AIG1) family protein               |
| <i>Migut.K00413</i> | LG11 | 1973875 | <i>AT1G23940.1</i> | Symbols:                                                  | ARM repeat superfamily protein                              |
| <i>Migut.K00414</i> | LG11 | 1975774 | <i>AT5G06130.1</i> | Symbols:                                                  | chaperone protein dnaJ-related                              |
| <i>Migut.K00415</i> | LG11 | 1977944 | <i>AT5G34850.1</i> | Symbols: ATPAP26,<br>PAP26                                | purple acid phosphatase 26                                  |
| <i>Migut.K00416</i> | LG11 | 1982053 | <i>AT1G05500.1</i> | Symbols: SYTE, ATSYTE,<br>NTMC2TYPE2.1,<br>NTMC2T.1, SYT5 | Calcium-dependent                                           |
| <i>Migut.K00417</i> | LG11 | 1992221 | <i>AT5G33280.1</i> | Symbols:                                                  | Voltage-gated chloride channel family protein               |
| <i>Migut.K00418</i> | LG11 | 1995741 | <i>AT2G11520.1</i> | Symbols: CRCK3                                            | calmodulin-binding receptor-like cytoplasmic                |
| <i>Migut.K00419</i> | LG11 | 2003563 | <i>AT5G20270.1</i> | Symbols: HHP1                                             | heptahelical transmembrane protein1                         |
| <i>Migut.K00420</i> | LG11 | 2006617 | <i>AT2G11000.1</i> | Symbols: ATMAK10,<br>MAK10                                | MAK10 homologue                                             |
| <i>Migut.K00421</i> | LG11 | 2019692 | <i>AT5G35200.1</i> | Symbols:                                                  | ENTH/ANTH/VHS superfamily protein                           |
| <i>Migut.K00422</i> | LG11 | 2027049 | <i>AT4G31080.1</i> | Symbols:                                                  | Protein of unknown function (DUF2296)                       |
| <i>Migut.K00423</i> | LG11 | 2033432 | <i>AT5G35430.1</i> | Symbols:                                                  | Tetratricopeptide repeat (TPR)-like superfamily             |
| <i>Migut.K00424</i> | LG11 | 2041700 | <i>AT5G11730.1</i> | Symbols:                                                  | Core-2/I-branching beta-1,6-N-acetylglucosaminyltransferase |
| <i>Migut.K00425</i> | LG11 | 2053768 | <i>AT5G20250.4</i> | Symbols: DIN10                                            | Raffinose synthase family protein                           |
| <i>Migut.K00426</i> | LG11 | 2057051 | <i>AT3G53270.5</i> | Symbols:                                                  | Small nuclear RNA activating complex (SNAPc), subunit       |
| <i>Migut.K00427</i> | LG11 | 2060788 | <i>AT3G42170.1</i> | Symbols:                                                  | BED zinc finger ;hAT family dimerisation domain             |
| <i>Migut.K00428</i> | LG11 | 2079258 | <i>AT3G59440.1</i> | Symbols:                                                  | Calcium-binding EF-hand family protein                      |
| <i>Migut.K00429</i> | LG11 | 2080763 | <i>AT5G32440.3</i> | Symbols:                                                  | Ubiquitin system component Cue protein                      |
| <i>Migut.K00430</i> | LG11 | 2088194 | <i>AT3G01300.1</i> | Symbols:                                                  | Protein kinase superfamily protein                          |
| <i>Migut.K00431</i> | LG11 | 2096904 | <i>AT5G52600.1</i> | Symbols: AtMYB82,<br>MYB82                                | myb domain protein 82                                       |
| <i>Migut.K00432</i> | LG11 | 2104879 | <i>AT4G32280.1</i> | Symbols: IAA29                                            | indole-3-acetic acid inducible 29                           |



|                     |      |         |                    |                                               |                                                          |
|---------------------|------|---------|--------------------|-----------------------------------------------|----------------------------------------------------------|
| <i>Migut.K00433</i> | LG11 | 2109934 | <i>AT2G13290.2</i> | Symbols:                                      | beta-1,4-N-acetylglucosaminyltransferase family          |
| <i>Migut.K00434</i> | LG11 | 2113288 | <i>AT1G03050.1</i> | Symbols:                                      | ENTH/ANTH/VHS superfamily protein                        |
| <i>Migut.K00435</i> | LG11 | 2116002 | <i>AT5G67040.1</i> | Symbols:                                      | Protein of unknown function (DUF295)                     |
| <i>Migut.K00436</i> | LG11 | 2118261 | <i>AT3G33530.2</i> | Symbols:                                      | Transducin family protein / WD-40 repeat family          |
| <i>Migut.K00437</i> | LG11 | 2121622 | <i>AT3G33530.1</i> | Symbols:                                      | Transducin family protein / WD-40 repeat family          |
| <i>Migut.K00438</i> | LG11 | 2127985 | <i>AT5G20230.1</i> | Symbols: ATBCB, BCB,<br>SAG14                 | blue-copper-binding protein                              |
| <i>Migut.K00439</i> | LG11 | 2131991 | <i>AT4G00630.1</i> | Symbols: KEA2, ATKEA2                         | K+ efflux antiporter 2                                   |
| <i>Migut.K00440</i> | LG11 | 2136228 | <i>AT5G20230.1</i> | Symbols: ATBCB, BCB,<br>SAG14                 | blue-copper-binding protein                              |
| <i>Migut.K00441</i> | LG11 | 2139290 | <i>AT2G26600.1</i> | Symbols:                                      | Glycosyl hydrolase superfamily protein                   |
| <i>Migut.K00442</i> | LG11 | 2146046 | <i>AT4G02530.1</i> | Symbols:                                      | chloroplast thylakoid lumen protein                      |
| <i>Migut.K00443</i> | LG11 | 2156478 | <i>AT2G26580.2</i> | Symbols: YAB5                                 | plant-specific transcription factor YABBY family         |
| <i>Migut.K00444</i> | LG11 | 2166960 | <i>AT5G20200.1</i> | Symbols:                                      | nucleoporin-related                                      |
| <i>Migut.K00445</i> | LG11 | 2171971 | <i>AT5G20190.1</i> | Symbols:                                      | Tetratricopeptide repeat (TPR)-like superfamily          |
| <i>Migut.K00446</i> | LG11 | 2189538 | <i>AT5G35410.1</i> | Symbols: SOS2,<br>SNRK3.11, CIPK24,<br>ATSOS2 | Protein kinase superfamily                               |
| <i>Migut.K00447</i> | LG11 | 2195567 | <i>AT2G25490.1</i> | Symbols: EBF1, FBL6                           | EIN3-binding F box protein 1                             |
| <i>Migut.K00448</i> | LG11 | 2203784 | <i>AT5G25360.2</i> | Symbols:                                      | unknown protein; FUNCTIONS IN: molecular_function        |
| <i>Migut.K00449</i> | LG11 | 2219724 | <i>AT3G15760.1</i> | Symbols:                                      | unknown protein; FUNCTIONS IN: molecular_function        |
| <i>Migut.K00450</i> | LG11 | 2222923 | <i>AT3G15730.1</i> | Symbols: PLDALPHA1,<br>PLD                    | phospholipase D alpha 1                                  |
| <i>Migut.K00451</i> | LG11 | 2227236 | <i>AT3G15730.1</i> | Symbols: PLDALPHA1,<br>PLD                    | phospholipase D alpha 1                                  |
| <i>Migut.K00452</i> | LG11 | 2235354 | <i>AT3G15730.1</i> | Symbols: PLDALPHA1,<br>PLD                    | phospholipase D alpha 1                                  |
| <i>Migut.K00453</i> | LG11 | 2242774 | <i>AT5G19650.1</i> | Symbols: ATOFP8, OFP8                         | ovate family protein 8                                   |
| <i>Migut.K00454</i> | LG11 | 2248544 | <i>AT3G18830.1</i> | Symbols: ATPLT5, PMT5,<br>ATPMT5              | polyol/monosaccharide transporter                        |
| <i>Migut.K00455</i> | LG11 | 2261529 | <i>AT5G19540.1</i> | Symbols:                                      | unknown protein; FUNCTIONS IN: molecular_function        |
| <i>Migut.K00456</i> | LG11 | 2265574 |                    | Symbols: ALDH2C4,<br>ALDH1A, REF1             | aldehyde dehydrogenase 2C4                               |
| <i>Migut.K00457</i> | LG11 | 2272028 | <i>AT3G24503.1</i> | Symbols: MSH7, MSH6-2,<br>ATMSH7              | MUTS homolog 7                                           |
| <i>Migut.K00458</i> | LG11 | 2276258 | <i>AT3G24495.1</i> | Symbols:                                      | Alcohol dehydrogenase transcription factor Myb/SANT-like |
| <i>Migut.K00459</i> | LG11 | 2295529 | <i>AT3G24490.1</i> | Symbols:                                      | ATP binding                                              |
| <i>Migut.K00460</i> | LG11 | 2297431 | <i>AT3G24430.1</i> | Symbols: HCF101                               | ATP binding                                              |
| <i>Migut.K00461</i> | LG11 | 2304651 | <i>AT5G19600.1</i> | Symbols: SULTR3;5                             | sulfate transporter 3;5                                  |
| <i>Migut.K00462</i> | LG11 | 2312793 | <i>AT4G13350.2</i> | Symbols: NIG                                  | NSP (nuclear shuttle protein)-interacting GTPase         |
| <i>Migut.K00463</i> | LG11 | 2319672 | <i>AT2G26695.1</i> | Symbols:                                      | Ran BP2/NZF zinc finger-like superfamily protein         |
| <i>Migut.K00464</i> | LG11 | 2321628 | <i>AT3G24330.1</i> | Symbols:                                      | O-Glycosyl hydrolases family 17 protein                  |
| <i>Migut.K00465</i> | LG11 | 2326226 | <i>AT3G24360.2</i> | Symbols:                                      | ATP-dependent caseinolytic (Clp) protease/crotonase      |
| <i>Migut.K00466</i> | LG11 | 2329644 | <i>AT2G26730.1</i> | Symbols:                                      | Leucine-rich repeat protein kinase family protein        |
| <i>Migut.K00467</i> | LG11 | 2335789 | <i>AT3G24740.2</i> | Symbols:                                      | Protein of unknown function (DUF1644)                    |
| <i>Migut.K00468</i> | LG11 | 2341209 | <i>AT2G26910.1</i> | Symbols: PDR4, ATPDR4                         | pleiotropic drug resistance 4                            |
| <i>Migut.K00469</i> | LG11 | 2356373 | <i>AT1G08510.1</i> | Symbols: FATB                                 | fatty acyl-ACP thioesterases B                           |
| <i>Migut.K00470</i> | LG11 | 2363219 | <i>AT1G04870.2</i> | Symbols: PRMT10,<br>ATPRMT10                  | protein arginine methyltransferase                       |
| <i>Migut.K00471</i> | LG11 | 2367162 | <i>AT3G24480.1</i> | Symbols:                                      | Leucine-rich repeat (LRR) family protein                 |

|                     |      |         |                     |                                                  |                                                       |
|---------------------|------|---------|---------------------|--------------------------------------------------|-------------------------------------------------------|
| <i>Migut.K00472</i> | LG11 | 2378836 | <i>AT2G26695.1</i>  | Symbols:                                         | Ran BP2/NZF zinc finger-like superfamily protein      |
| <i>Migut.K00473</i> | LG11 | 2380393 | <i>AT5G19460.1</i>  | Symbols: atnuds20,<br>NUDT20                     | nudix hydrolase homolog 20                            |
| <i>Migut.K00474</i> | LG11 | 2383291 | <i>AT5G20110.1</i>  | Symbols:                                         | Dynein light chain type 1 family protein              |
| <i>Migut.K00475</i> | LG11 | 2387517 | <i>AT5G25400.1</i>  | Symbols:                                         | Nucleotide-sugar transporter family protein           |
| <i>Migut.K00476</i> | LG11 | 2390506 | <i>AT2G34160.1</i>  | Symbols:                                         | Alba DNA/RNA-binding protein                          |
| <i>Migut.K00477</i> | LG11 | 2393001 | <i>AT1G80170.1</i>  | Symbols:                                         | Pectin lyase-like superfamily protein                 |
| <i>Migut.K00478</i> | LG11 | 2398906 | <i>AT3G47650.1</i>  | Symbols:                                         | DnaJ/Hsp40 cysteine-rich domain superfamily protein   |
| <i>Migut.K00479</i> | LG11 | 2400960 | <i>AT3G47650.1</i>  | Symbols:                                         | DnaJ/Hsp40 cysteine-rich domain superfamily protein   |
| <i>Migut.K00480</i> | LG11 | 2402671 | <i>AT2G41475.1</i>  | Symbols:                                         | Embryo-specific protein 3, (ATS3)                     |
| <i>Migut.K00481</i> | LG11 | 2405238 | <i>AT1G30760.1</i>  | Symbols:                                         | FAD-binding Berberine family protein                  |
| <i>Migut.K00482</i> | LG11 | 2407586 | <i>AT2G26670.1</i>  | Symbols: HY1, ATHO1,<br>HO1, TED4, GUN2, HY6     | Plant haem oxygenase                                  |
| <i>Migut.K00483</i> | LG11 | 2411527 | <i>AT2G41480.1</i>  | Symbols:                                         | Peroxidase superfamily protein                        |
| <i>Migut.K00484</i> | LG11 | 2414952 | <i>AT5G19960.1</i>  | Symbols:                                         | RNA-binding (RRM/RBD/RNP motifs) family protein       |
| <i>Migut.K00485</i> | LG11 | 2425346 | <i>AT3G57620.1</i>  | Symbols:                                         | glyoxal oxidase-related protein                       |
| <i>Migut.K00486</i> | LG11 | 2443189 | <i>AT1G70830.5</i>  | Symbols: MLP28                                   | MLP-like protein 28                                   |
| <i>Migut.K00487</i> | LG11 | 2446012 | <i>AT4G28850.1</i>  | Symbols: XTH26,<br>ATXTH26                       | xyloglucan endotransglucosylase/hydrolase             |
| <i>Migut.K00488</i> | LG11 | 2450727 | <i>AT1G70830.5</i>  | Symbols: MLP28                                   | MLP-like protein 28                                   |
| <i>Migut.K00489</i> | LG11 | 2454250 | <i>AT4G28850.1</i>  | Symbols: XTH26,<br>ATXTH26                       | xyloglucan endotransglucosylase/hydrolase             |
| <i>Migut.K00490</i> | LG11 | 2470641 | <i>AT1G67290.1</i>  | Symbols:                                         | glyoxal oxidase-related protein                       |
| <i>Migut.K00491</i> | LG11 | 2475504 | <i>AT2G20080.1</i>  | Symbols:                                         | unknown protein; FUNCTIONS IN: molecular_function     |
| <i>Migut.K00492</i> | LG11 | 2482643 | <i>AT4G29060.1</i>  | Symbols: emb2726                                 | elongation factor Ts family protein                   |
| <i>Migut.K00493</i> | LG11 | 2486650 | <i>AT4G29060.1</i>  | Symbols: emb2726                                 | elongation factor Ts family protein                   |
| <i>Migut.K00494</i> | LG11 | 2493312 | <i>AT4G14465.1</i>  | Symbols: AHL20                                   | AT-hook motif nuclear-localized protein 20            |
| <i>Migut.K00495</i> | LG11 | 2495853 | <i>AT4G29100.1</i>  | Symbols:                                         | basic helix-loop-helix (bHLH) DNA-binding superfamily |
| <i>Migut.K00496</i> | LG11 | 2499880 | <i>AT1G30910.1</i>  | Symbols:                                         | Molybdenum cofactor sulfurase family protein          |
| <i>Migut.K00497</i> | LG11 | 2506024 | <i>AT3G06880.2</i>  | Symbols:                                         | Transducin/WD40 repeat-like superfamily protein       |
| <i>Migut.K00498</i> | LG11 | 2512385 | <i>AT1G665980.1</i> | Symbols: TPX1                                    | thioredoxin-dependent peroxidase 1                    |
| <i>Migut.K00499</i> | LG11 | 2515206 | <i>AT4G28950.1</i>  | Symbols: ARAC7,<br>ATROP9, ATRAC7, RAC7,<br>ROP9 | RHO-related protein                                   |
| <i>Migut.K00500</i> | LG11 | 2518353 | <i>AT3G61610.1</i>  | Symbols:                                         | Galactose mutarotase-like superfamily protein         |
| <i>Migut.K00501</i> | LG11 | 2522890 | <i>AT4G28990.1</i>  | Symbols:                                         | RNA-binding protein-related                           |
| <i>Migut.K00502</i> | LG11 | 2530179 | <i>AT4G29000.1</i>  | Symbols:                                         | Tesmin/TSO1-like CXC domain-containing protein        |
| <i>Migut.K00503</i> | LG11 | 2535317 | <i>AT4G29010.1</i>  | Symbols: AIM1                                    | Enoyl-CoA hydratase/isomerase family                  |
| <i>Migut.K00504</i> | LG11 | 2542411 | <i>AT3G61610.1</i>  | Symbols:                                         | Galactose mutarotase-like superfamily protein         |
| <i>Migut.K00505</i> | LG11 | 2560455 | <i>AT5G57330.1</i>  | Symbols:                                         | Galactose mutarotase-like superfamily protein         |
| <i>Migut.K00506</i> | LG11 | 2564143 | <i>AT5G42030.1</i>  | Symbols: ABIL4                                   | ABL interactor-like protein 4                         |
| <i>Migut.K00507</i> | LG11 | 2567143 | <i>AT5G19550.1</i>  | Symbols: ASP2, AAT2                              | aspartate aminotransferase 2                          |
| <i>Migut.K00508</i> | LG11 | 2569507 | <i>AT3G24620.1</i>  | Symbols: ATROPGEF8,<br>ROPGEF8                   | RHO guanyl-nucleotide exchange                        |
| <i>Migut.K00509</i> | LG11 | 2579463 | <i>AT3G24600.1</i>  | Symbols:                                         | Late embryogenesis abundant protein, group 2          |
| <i>Migut.K00510</i> | LG11 | 2581447 | <i>AT1G52280.1</i>  | Symbols: AtRABG3d,<br>RABG3d                     | RAB GTPase homolog G3D                                |
| <i>Migut.K00511</i> | LG11 | 2584153 | <i>AT5G02850.1</i>  | Symbols:                                         | hydroxyproline-rich glycoprotein family protein       |
| <i>Migut.K00512</i> | LG11 | 2587243 | <i>AT3G24550.1</i>  | Symbols: ATPERK1,<br>PERK1                       | proline extensin-like receptor kinase                 |

|                     |      |         |                    |                                    |                                                                                 |
|---------------------|------|---------|--------------------|------------------------------------|---------------------------------------------------------------------------------|
| <i>Migut.K00513</i> | LG11 | 2597711 | <i>AT2G26660.1</i> | Symbols: ATPX2, SPX2               | SPX domain gene 2                                                               |
| <i>Migut.K00514</i> | LG11 | 2616063 | <i>AT1G67280.1</i> | Symbols:                           | Glyoxalase/Bleomycin resistance protein/Dioxygenase                             |
| <i>Migut.K00515</i> | LG11 | 2621009 | <i>AT4G28910.3</i> | Symbols: NINJA                     | novel interactor of JAZ                                                         |
| <i>Migut.K00516</i> | LG11 | 2627659 | <i>AT2G20030.1</i> | Symbols:                           | RING/U-box superfamily protein                                                  |
| <i>Migut.K00517</i> | LG11 | 2631660 | <i>AT2G20050.1</i> | Symbols:                           | protein serine/threonine phosphatases;protein kinases;catalytics;cAMP-dependent |
| <i>Migut.K00518</i> | LG11 | 2643749 | <i>AT5G37000.1</i> | Symbols:                           | Exostosin family protein                                                        |
| <i>Migut.K00519</i> | LG11 | 2648076 | <i>AT2G20020.1</i> | Symbols: CAF1, ATCAF1              | RNA-binding CRS1 / YhbY (CRM) domain-containing                                 |
| <i>Migut.K00520</i> | LG11 | 2651728 | <i>AT1G77210.2</i> | Symbols: STP14                     | sugar transporter 14                                                            |
| <i>Migut.K00521</i> | LG11 | 2666906 | <i>AT2G44970.1</i> | Symbols:                           | alpha/beta-Hydrolases superfamily protein                                       |
| <i>Migut.K00522</i> | LG11 | 2676720 | <i>AT5G11590.1</i> | Symbols: TINY2                     | Integrase-type DNA-binding superfamily protein                                  |
| <i>Migut.K00523</i> | LG11 | 2685601 | <i>AT5G55300.1</i> | Symbols: MGO1, TOP1ALPHA, TOP1     | DNA topoisomerase I alpha                                                       |
| <i>Migut.K00524</i> | LG11 | 2701261 | <i>AT2G25800.1</i> | Symbols:                           | Protein of unknown function (DUF810)                                            |
| <i>Migut.K00525</i> | LG11 | 2707771 | <i>AT5G42180.1</i> | Symbols:                           | Peroxidase superfamily protein                                                  |
| <i>Migut.K00526</i> | LG11 | 2709666 | <i>AT5G19690.1</i> | Symbols: STT3A                     | staurosporin and temperature sensitive 3-like                                   |
| <i>Migut.K00527</i> | LG11 | 2719226 | <i>AT1G77170.1</i> | Symbols:                           | Tetratricopeptide repeat (TPR)-like superfamily                                 |
| <i>Migut.K00528</i> | LG11 | 2732146 | <i>AT5G56369.1</i> | Symbols:                           | Defensin-like (DEFL) family protein                                             |
| <i>Migut.K00529</i> | LG11 | 2736689 | <i>AT1G33020.1</i> | Symbols:                           | F-box and associated interaction domains-containing                             |
| <i>Migut.K00530</i> | LG11 | 2738295 | <i>AT2G19950.2</i> | Symbols: GC1                       | golgin candidate 1                                                              |
| <i>Migut.K00531</i> | LG11 | 2752315 | <i>AT2G19930.1</i> | Symbols:                           | RNA-dependent RNA polymerase family protein                                     |
| <i>Migut.K00532</i> | LG11 | 2758333 | <i>AT5G25880.1</i> | Symbols: ATNADP-ME3, NADP-ME3      | NADP-malic enzyme 3                                                             |
| <i>Migut.K00533</i> | LG11 | 2763977 | <i>AT1G35190.1</i> | Symbols:                           | 2-oxoglutarate (2OG) and Fe(II)-dependent oxygenase                             |
| <i>Migut.K00534</i> | LG11 | 2768240 | <i>AT1G35190.1</i> | Symbols:                           | 2-oxoglutarate (2OG) and Fe(II)-dependent oxygenase                             |
| <i>Migut.K00535</i> | LG11 | 2773022 | <i>AT3G19950.1</i> | Symbols:                           | RING/U-box superfamily protein                                                  |
| <i>Migut.K00536</i> | LG11 | 2777960 | <i>AT3G19950.1</i> | Symbols:                           | RING/U-box superfamily protein                                                  |
| <i>Migut.K00537</i> | LG11 | 2780258 | <i>AT4G15450.1</i> | Symbols:                           | Senescence/dehydration-associated protein-related                               |
| <i>Migut.K00538</i> | LG11 | 2784016 | <i>AT2G40570.1</i> | Symbols:                           | initiator tRNA phosphoribosyl transferase family                                |
| <i>Migut.K00539</i> | LG11 | 2787696 | <i>AT1G60660.1</i> | Symbols: B5 #5, ATCB5LP, CB5LP     | cytochrome B5-like protein                                                      |
| <i>Migut.K00540</i> | LG11 | 2789533 | <i>AT2G19880.1</i> | Symbols:                           | Nucleotide-diphospho-sugar transferases superfamily                             |
| <i>Migut.K00541</i> | LG11 | 2794991 | <i>AT2G19870.1</i> | Symbols:                           | tRNA/rRNA methyltransferase (SpoU) family protein                               |
| <i>Migut.K00542</i> | LG11 | 2798610 | <i>AT2G37410.2</i> | Symbols: ATTIM17-2, TIM17, TIM17-2 | translocase inner membrane                                                      |
| <i>Migut.K00543</i> | LG11 | 2801487 | <i>AT2G37410.2</i> | Symbols: ATTIM17-2, TIM17, TIM17-2 | translocase inner membrane                                                      |
| <i>Migut.K00544</i> | LG11 | 2804409 | <i>AT5G25930.1</i> | Symbols:                           | Protein kinase family protein with leucine-rich                                 |
| <i>Migut.K00545</i> | LG11 | 2807977 | <i>AT4G14010.1</i> | Symbols: RALFL32                   | ralf-like 32                                                                    |
| <i>Migut.K00546</i> | LG11 | 2810843 | <i>AT3G16490.1</i> | Symbols: IQD26                     | IQ-domain 26                                                                    |
| <i>Migut.K00547</i> | LG11 | 2814692 | <i>AT5G19730.1</i> | Symbols:                           | Pectin lyase-like superfamily protein                                           |
| <i>Migut.K00548</i> | LG11 | 2824581 | <i>AT4G29380.1</i> | Symbols:                           | protein kinase family protein / WD-40 repeat family                             |
| <i>Migut.K00549</i> | LG11 | 2848477 | <i>AT5G56550.1</i> | Symbols: OXS3, ATOXS3              | oxidative stress 3                                                              |
| <i>Migut.K00550</i> | LG11 | 2852108 | <i>AT5G56590.1</i> | Symbols:                           | O-Glycosyl hydrolases family 17 protein                                         |
| <i>Migut.K00551</i> | LG11 | 2856530 | <i>AT2G19760.1</i> | Symbols: PFN1, PRF1                | profilin 1                                                                      |
| <i>Migut.K00552</i> | LG11 | 2861634 | <i>AT2G19770.1</i> | Symbols: PRF5                      | profilin 5                                                                      |
| <i>Migut.K00553</i> | LG11 | 2872167 | <i>AT4G29310.1</i> | Symbols:                           | Protein of unknown function (DUF1005)                                           |
| <i>Migut.K00554</i> | LG11 | 2882993 | <i>AT1G52720.1</i> | Symbols:                           | unknown protein; BEST Arabidopsis thaliana protein                              |

|                     |      |         |                    |                             |                                                  |
|---------------------|------|---------|--------------------|-----------------------------|--------------------------------------------------|
| <i>Migut.K00555</i> | LG11 | 2886506 | <i>AT4G29260.1</i> | Symbols:                    | HAD superfamily, subfamily IIIB acid phosphatase |
| <i>Migut.K00556</i> | LG11 | 2891391 | <i>AT4G29240.1</i> | Symbols:                    | Leucine-rich repeat (LRR) family protein         |
| <i>Migut.K00557</i> | LG11 | 2896561 | <i>AT2G35680.1</i> | Symbols:                    | Phosphotyrosine protein phosphatases superfamily |
| <i>Migut.K00558</i> | LG11 | 2902033 | <i>AT4G29230.1</i> | Symbols: anac075,<br>NAC075 | NAC domain containing protein 75                 |
| <i>Migut.K00559</i> | LG11 | 2911835 | <i>AT1G51980.1</i> | Symbols:                    | Insulinase (Peptidase family M16) protein        |
| <i>Migut.K00560</i> | LG11 | 2918050 | <i>AT5G47240.1</i> | Symbols: atnudt8,<br>NUDT8  | nudix hydrolase homolog 8                        |

Table S3. Amino acid sequences from the *M. guttatus* and *M. laciniatus* homologs of the leaf shape candidate genes *BAM2* (Exon 5) and *KNATM* (Exon 2). Amino acid differences between the species are highlighted in red.

| Gene         | Exon | Species              | Amino acid sequence                                                         |
|--------------|------|----------------------|-----------------------------------------------------------------------------|
| <i>BAM2</i>  | 5    | <i>M. guttatus</i>   | VYFDYMRSFRVEFDEFFEDGVITEIEIGLGPCGELRYPSYPAKHGW<br>KYPGIGEFQ                 |
|              |      | <i>M. laciniatus</i> | VYFDYMRSFRVEFDEFFEDRVITEIEIGLGPCGELRYPSYPAKHGW<br>KYPGIGEFQ                 |
| <i>KNATM</i> | 2    | <i>M. guttatus</i>   | EAYCMTLKKVKERIEEPQQESMAFIDQMYSQLGDLLIDFPSSSIHH<br>QVSLSLSLSLSYVKREIKFEMRMN* |
|              |      | <i>M. laciniatus</i> | EAYCMTLKKVKERMEEPQQESMAFIDQMYSQLGDLLIDFPSSSIH<br>HQVSLSLSLSLSYVKREIKFEMRMN* |
